# Supplementary material for: Percutaneous coronary intervention in patients with acute coronary syndrome in Chinese Military Hospitals, 2011–2014: a retrospective observational study of a national registry
Source: PubMed Central journal article supplement — BMJ Open. 2018 Oct 24;8(10):e023133. doi: 10.1136/bmjopen-2018-023133 (PMC6224757; doi:10.1136/bmjopen-2018-023133), 2018-10-24
Supplement: bmjopen-2018-023133.draft_revisions.pdf [file bmjopen-2018-023133.draft_revisions.pdf]

# BMJ Open

BMJ Open is committed to open peer review. As part of this commitment we make the peer review history of every article we publish publicly available.

When an article is published we post the peer reviewers' comments and the authors' responses online. We also post the versions of the paper that were used during peer review. These are the versions that the peer review comments apply to.

The versions of the paper that follow are the versions that were submitted during the peer review process. They are not the versions of record or the final published versions. They should not be cited or distributed as the published version of this manuscript.

BMJ Open is an open access journal and the full, final, typeset and author-corrected version of record of the manuscript is available on our site with no access controls, subscription charges or pay-per-view fees (<http://bmjopen.bmj.com>).

If you have any questions on BMJ Open's open peer review process please email [info.bmjopen@bmj.com](mailto:info.bmjopen@bmj.com)

# BMJ Open

## Percutaneous Coronary Intervention in Patients with Acute Coronary Syndrome in China, 2011-2014

|                               |                                                                                                                                                                                            |
|-------------------------------|--------------------------------------------------------------------------------------------------------------------------------------------------------------------------------------------|
| Journal:                      | <i>BMJ Open</i>                                                                                                                                                                            |
| Manuscript ID                 | bmjopen-2018-023133                                                                                                                                                                        |
| Article Type:                 | Research                                                                                                                                                                                   |
| Date Submitted by the Author: | 31-Mar-2018                                                                                                                                                                                |
| Complete List of Authors:     | Zhao, Ren; General Hospital of Shenyang Military Command<br>Xu, Kai; General Hospital of Shenyang Military Command<br>Li, Yi; General Hospital of Shenyang Military Command<br>Han, Yaling |
| Keywords:                     | Acute Coronary Syndrome, Percutaneous Coronary Intervention, Trending, Quality of care                                                                                                     |
|                               |                                                                                                                                                                                            |

SCHOLARONE™  
Manuscripts  
Peer Review Only

1  
2  
3  
4 **Percutaneous Coronary Intervention in Patients with Acute**  
5  
6 **Coronary Syndrome in China, 2011-2014**  
7

8 Ren Zhao,<sup>1</sup> Kai Xu,<sup>1</sup> Yi Li, Yaling Han, for the NRCIMH Program<sup>#</sup>.  
9

10 <sup>1</sup>Ren Zhao and Kai Xu contributed equally to this study.  
11

12  
13 Authors Affiliation: Cardiovascular Intervention Training Center of National Ministry of Health/of  
14  
15 Chinese Medical Association, National Key Department of Cardiology, Institute of Cardiovascular  
16  
17 Disease of PLA, Key Laboratory of Emergent and Severe Cardiovascular Disease Cures of PLA,  
18  
19 General Hospital of Shenyang Military Region, Shenyang, China.  
20  
21

22  
23 <sup>#</sup>The participating hospitals of the NRCIMH Program are listed in Table S1 in the Supplement.  
24

25 <sup>\*</sup>Corresponding Author: Tel: +86 24 28856 123; fax: +86 24 28897 311. *E-mail address*:  
26

27  
28 han\_yaling@163.com (Y. Han). Department of Cardiology, General Hospital of Shenyang Military  
29  
30 Region, No.83 Wenhua Road, Shenyang, 110016, China  
31

32  
33 Running head: PCI performance in ACS  
34  
35  
36  
37  
38  
39  
40  
41  
42  
43  
44  
45  
46  
47  
48  
49  
50  
51  
52  
53  
54  
55  
56  
57  
58  
59  
60

**ABSTRACT**

**Objectives** Interventional treatment of patients with ACS (Acute Coronary Syndrome) is surging dramatically in China in recent years, whereas nationwide assessments of the quality of PCI (Percutaneous Coronary Intervention) procedural performance and outcomes are scarce. We aimed to provide an updated and real-world overview of the performance of PCI in ACS patients since 2011 in China after the China PEACE study from 2001 to 2011.

**Methods** In this cross-sectional study, data were extracted from the NRCIMH (National Registry of Cardiovascular Intervention in Military Hospitals) database to create a national sample of 144 659 ACS patients undergoing PCI at 117 military hospitals in all regions of China from calendar year 2011 to 2014. Patient characteristics, procedural performance, PCI outcomes and adverse events and temporal changes were analyzed.

**Results** During 2011 to 2014, ACS patients undergoing PCI increased dramatically. Small numbers of high-volume hospitals performed the majority of PCI procedures. However, only half of these patients were adequately covered and proportions for the use of assisted devices and novel medications were relatively small. Radial artery access was still increasing with time. Primary PCIs were performed on 45.4% STEMI patients with PCI procedures. 3.8% lesion vessels involve left main artery. Implanted stents, the overall complications and in-hospital mortality were decreasing remarkably.

**Conclusions** Although interventional resources were limited with great regional disparities in China, notable improvements in the quality of care were found during the study years. Our findings can serve as an indispensable supplement to a more comprehensive understanding of the practice of contemporary cardiac intervention in China.

**Key Words:** Acute Coronary Syndrome; Percutaneous Coronary Intervention; Trending; Quality of

1  
2  
3  
4 care.

5  
6 **Strengths and limitations of this study**

7  
8 This is the first nationwide study of the performance of PCI in ACS patients covering all geographic  
9 regions of mainland China.

10  
11  
12  
13 The assessment was based on real world registry data with sequential enrollment from calendar year  
14 2011 to 2014.

15  
16  
17  
18 PCI outcomes were based on in-hospital data and no follow-up were done to evaluate the long term  
19 improvement of ACS patients undergoing PCI.

20  
21  
22  
23 Although all PCI-capable military hospitals participated in this program, patient outcomes might be  
24 differentially affected by interventionist in hospitals with various volumes of PCI procedures each year,  
25 thus may confound the overall results.  
26  
27  
28

29  
30 **INTRODUCTION**

31  
32  
33 In China, military hospitals play an indispensable role in providing health care service largely to  
34 civilian patients in peacetime.<sup>1-5</sup> The drastic increase of acute coronary syndrome (ACS) in China has  
35 also catalyzed the growth of percutaneous coronary intervention (PCI) in quantity.<sup>6</sup> However, whether  
36 the rapid growth of PCI volume has translated into good quality of care for these ACS patients treated  
37 in military hospitals remains unclear. The lack of a nationwide comprehensive assessment of  
38 interventional practice hampered the improvement of health care provided to these patients. To  
39 standardize and monitor the quality of care for patients undergoing PCI procedures, we conducted the  
40 NRCIMH (National Registry of Cardiovascular Intervention in Military Hospitals) study.<sup>7-9</sup> During  
41 calendar years 2011 to 2014, 117 PCI-capable military hospitals in all seven geographical regions of  
42 China and 11 241 ACS patients undergoing PCI procedures were included in this study. Patient  
43  
44  
45  
46  
47  
48  
49  
50  
51  
52  
53  
54  
55  
56  
57  
58  
59  
60

1  
2  
3 characteristics, quality of procedural performance, PCI outcomes, and in-hospital adverse events and  
4  
5  
6 their temporal changes were analyzed over time.  
7  
8  
9

## 10 **Methods**

11  
12  
13 This study was a cross-sectional study using a registered dataset. The original data for this study was  
14  
15 extracted from the National Registry of Cardiovascular Intervention in Military Hospitals (NRCIMH,  
16  
17 web access via <http://www.xxgjr.com>). This database collected social-demographic, medical and  
18  
19 interventional data of patients who had cardiovascular disease and underwent cardiac interventions  
20  
21 since October 2010 in all military hospitals nationwide that are qualified to perform cardiac  
22  
23 catheterization and PCI.<sup>7-9</sup> Patient demographics, clinical characteristics, and treatment patterns during  
24  
25 hospitalization were collected by physicians who were in charge of the patient, and coronary  
26  
27 catheterization or PCI related information were collected by the responsible operator or technical  
28  
29 assistant. Patient data were censored and uploaded into the database by designated medical personnel in  
30  
31 each individual hospital. The majority of patients had coronary artery disease and underwent PCI. This  
32  
33 study was approved by the ethics committee of the General Hospital of Shenyang Military Region. The  
34  
35 requirement of informed consent was waived due to the nature of the retrospective study. All  
36  
37 participating hospitals accepted the ethics committee approval.  
38  
39  
40  
41  
42  
43  
44

45 ACS Patients (with definite diagnosis of either STEMI, NSTEMI, or unstable angina pectoris)  
46  
47 undergoing interventional procedures in all 117 military hospitals (Table S1) from January 1, 2011 to  
48  
49 December 31, 2014 were included in this study. Patients with missing data were excluded in various  
50  
51 categorical analyses.  
52  
53

54 We collected data from a unified registry form abstracted from the original Database systems,  
55  
56

1  
2  
3 including baseline characteristics (diagnosis, patient category, age, gender, ethnicity, region of  
4 admission hospital, medical history), perioperative characteristics (primary PCI composition, access  
5 artery, contrast type, antiplatelet and anticoagulation medications, assisted devices), PCI outcomes  
6 (stenosis pre-PCI, lesion category, lesion vessel, target vessel), and adverse outcomes including  
7 complication and death both during PCI and post-PCI. For the convenience of calculation, anomalous  
8 artery, intermediate artery and vessel graft lesion as well as interventions done in these vessels were all  
9 merged into the individual categories. In addition, due to a systematic revision of the registry form  
10 since 2013, partial data were analyzed and summarized in the supplement, including location and Killip  
11 classification of MI history, assisted device used during 2011-2013, information regarding medical  
12 coverage, thrombolysis of STEMI patient, PCI outcomes, and stent manufacturer during 2013-2014.  
13 The sum for each measured category was listed in the column of each category unless otherwise  
14 specified.

15  
16 We used percentages to describe categorical variables and median with interquartile ranges (IQRs) to  
17 describe continuous variables unless otherwise specified.  $\chi^2$  trend tests were used to examine trends  
18 across different study years for categorical variables. For the comparison of data between 2013 and  
19 2014,  $\chi^2$  tests were used for categorical variables and Mann Whitney tests for continuous variables with  
20 non-normal distribution. All comparisons were 2-sided, with statistical significance defined as  $P < 0.05$ .  
21 Statistical analyses were performed using GraphPad Prism, version 6.01.

22  
23 *Patient and Public Involvement* Patients and public were not involved in this study.

## 24 **Results**

25  
26 A total of 144 659 ACS patients undergoing PCI in 117 military hospitals were recruited into this  
27 study from 2011 to 2014, located in all 7 geographic regions of mainland China, including North China

(n = 25), Northwest (n = 14), Northeast (n = 10), East China (n = 29), Southwest (n = 14), Central China (n = 12), and South China (n = 13). Of these, 82 hospitals provided 140 374 cases (97.0%) across all the study years (Table S1). In brief, only 20 (17.1%) hospitals performed more than 400 PCIs on ACS patients annually (Figure 1A), and these hospitals performed 71.9% PCIs (104 026 cases) during 2011-2014 (Figure 1B). Geographically, although the total number of hospitals in Northern China (North China, Northwest, Northeast regions) was less than that in Southern China (South China, East China, Central China, and Southwest regions), there were more military hospitals in Northern China performed PCI procedures > 400 cases per year than those in Southern China (Figure 1C), and northern military hospitals performed the majority of PCIs during the study years (66.5%) (Figure 1D).

Generally, the number of ACS patient undergoing PCI has increased by 27.8%, while the proportions of most comorbidities of these patients had concordant decrease over time. Hospitals in northern China (North China, Northwest, and Northeast) performed the majority of PCIs, with most patients being civilian and with Han ethnicity. There were significant increases in the proportions of patients diagnosed as UAP, of civilian identity, male gender, treated in hospitals in Northeast, East and South China, and significant decreases in the proportions of patients diagnosed as STEMI, treated in hospitals in North China, Northwest and Central China (Table 1). During 2013-2014, only half of these patients were covered by urban resident medical service (53.4% to 53.6%) (Table S2).

**Table 1. Baseline characteristics of ACS patients undergoing PCI during 2011-2014**

|            | 2011  |      | 2012  |      | 2013  |      | 2014  |      | P value for trend |
|------------|-------|------|-------|------|-------|------|-------|------|-------------------|
|            | n     | %    | n     | %    | n     | %    | n     | %    |                   |
| ACS        | 30800 |      | 34974 |      | 39524 |      | 39361 |      |                   |
| UAP        | 22038 | 71.6 | 24847 | 71.0 | 28727 | 72.7 | 28508 | 72.4 | < .0001           |
| STEMI      | 6514  | 21.1 | 7302  | 20.9 | 7889  | 20.0 | 7856  | 20.0 | < .0001           |
| NSTEMI     | 2248  | 7.3  | 2825  | 8.1  | 2908  | 7.4  | 2997  | 7.6  | .87               |
| Age, years | 30651 |      | 34872 |      | 39466 |      | 39351 |      |                   |
| 18-24      | 12    | 0.0  | 8     | 0.0  | 16    | 0.0  | 15    | 0.0  | .70               |
| 25-34      | 177   | 0.6  | 223   | 0.6  | 246   | 0.6  | 243   | 0.6  | .62               |



|                    |       |      |       |      |       |      |       |      |        |
|--------------------|-------|------|-------|------|-------|------|-------|------|--------|
| 35-44              | 1597  | 5.2  | 1930  | 5.5  | 2149  | 5.4  | 2187  | 5.6  | .09    |
| 45-54              | 5849  | 19.1 | 6663  | 19.1 | 7283  | 18.5 | 7507  | 19.1 | .52    |
| 55-64              | 10291 | 33.6 | 11990 | 34.4 | 13888 | 35.2 | 13381 | 34.0 | .11    |
| 65-74              | 8615  | 28.1 | 9510  | 27.3 | 10650 | 27.0 | 10832 | 27.5 | .09    |
| 75-84              | 3850  | 12.6 | 4227  | 12.1 | 4884  | 12.4 | 4800  | 12.2 | .33    |
| >84                | 260   | 0.8  | 321   | 0.9  | 350   | 0.9  | 386   | 1.0  | .11    |
| Gender             | 30155 |      | 34191 |      | 39189 |      | 39336 |      |        |
| Male               | 22017 | 73.0 | 25423 | 74.4 | 29104 | 74.3 | 29193 | 74.2 | <.01   |
| Female             | 8138  | 27.0 | 8768  | 25.6 | 10085 | 25.7 | 10143 | 25.8 |        |
| Ethnicity          | 30800 |      | 34974 |      | 39524 |      | 39361 |      |        |
| Han                | 30589 | 99.3 | 34691 | 99.2 | 38974 | 98.6 | 38620 | 98.1 | <.0001 |
| Others             | 211   | 0.7  | 283   | 0.8  | 550   | 1.4  | 741   | 1.9  |        |
| Region of hospital | 30783 |      | 34970 |      | 39524 |      | 39361 |      |        |
| North China        | 9156  | 29.7 | 9631  | 27.5 | 9914  | 25.1 | 11086 | 28.2 | <.0001 |
| Northwest          | 7632  | 24.8 | 7939  | 22.7 | 9728  | 24.6 | 7821  | 19.9 | <.0001 |
| Northeast          | 3924  | 12.7 | 5347  | 15.3 | 6691  | 16.9 | 7284  | 18.5 | <.0001 |
| East China         | 3742  | 12.2 | 4630  | 13.2 | 5053  | 12.8 | 5241  | 13.3 | <.001  |
| Southwest          | 3515  | 11.4 | 4346  | 12.4 | 4877  | 12.3 | 4549  | 11.6 | .96    |
| Central China      | 1977  | 6.4  | 1928  | 5.5  | 1910  | 4.8  | 1944  | 4.9  | <.0001 |
| South China        | 837   | 2.7  | 1149  | 3.3  | 1351  | 3.4  | 1436  | 3.6  | <.0001 |
| Comorbidities      | 30800 |      | 34974 |      | 39524 |      | 39361 |      |        |
| Hypertension       | 17600 | 57.1 | 19942 | 57.0 | 21260 | 53.8 | 21701 | 55.1 | <.0001 |
| Hyperlipidemia     | 6844  | 22.2 | 7774  | 22.2 | 7420  | 18.8 | 7330  | 18.6 | <.0001 |
| Diabetes Mellitus  | 6829  | 22.2 | 7817  | 22.4 | 8394  | 21.2 | 8819  | 22.4 | .75    |
| COPD               | 541   | 1.8  | 448   | 1.3  | 478   | 1.2  | 447   | 1.1  | <.0001 |
| Current smoking    | 9093  | 29.5 | 10838 | 31.0 | 11467 | 29.0 | 10568 | 26.8 | <.0001 |
| Heart failure*     | 1378  | 4.5  | 1373  | 3.9  | 1331  | 3.4  | 1122  | 2.9  | <.0001 |
| Renal failure*     | 277   | 0.9  | 297   | 0.8  | 259   | 0.7  | 276   | 0.7  | <.001  |
| Under dialysis*    | 34    | 0.1  | 52    | 0.1  | 45    | 0.1  | 45    | 0.1  | .71    |
| Prior MI           | 7560  | 24.5 | 7828  | 22.4 | 7928  | 20.1 | 5648  | 14.3 | <.0001 |
| Prior CVD          | 2014  | 6.5  | 1912  | 5.5  | 1990  | 5.0  | 2018  | 5.1  | <.0001 |
| Prior PVD          | 457   | 1.5  | 430   | 1.2  | 489   | 1.2  | 515   | 1.3  | .09    |
| Prior PCI          | 5702  | 18.5 | 6125  | 17.5 | 6467  | 16.4 | 5973  | 15.2 | <.0001 |
| Prior CVS          | 1077  | 3.5  | 1192  | 3.4  | 563   | 1.4  | 14    | 0.0  | <.0001 |
| Prior CABG         | 936   | 3.0  | 952   | 2.7  | 580   | 1.5  | 204   | 0.5  | <.0001 |
| Familial CAD       | 805   | 2.6  | 867   | 2.5  | 681   | 1.7  | 615   | 1.6  | <.0001 |

ACS, acute coronary syndrome; CABG, coronary artery bypass graft; CAD, coronary artery disease; COPD, chronic obstructive pulmonary disease; CVD, cerebrovascular disease; CVS, cardiac valve surgery; MI, myocardial infarction; NSTEMI, non-ST elevation myocardial infarction; PCI, percutaneous coronary intervention; PVD, peripheral vascular disease; STEMI, ST elevation myocardial infarction; UAP, unstable angina pectoris; \* assessed and recorded at admission.

The proportion of primary PCI dropped significantly in ACS patients in all categories. In STEMI patients, the fraction of primary PCI in all PCI performed did not change dramatically (44.0% to 47.9%,

Table 2). There is remarkable increase in the proportion of anterior myocardial infarction and significant decrease in the proportion of cardiac function defined as Killip III/IV (Table S3). There was more time delay on first medical contact to balloon dilation in 2014 than in 2013 (median 50 vs 40,  $P < .01$ ) (Table S4). PCI procedures done through the radial artery had increased markedly from 72% in 2011 to 90.4% in 2014. The use of clopidogrel and GP IIb/IIIa inhibitor dropped significantly. Proportions of novel drugs like ticagrelor and bivalirudin, and of assisted devices such as intra-aortic balloon pump (IABP), intravascular ultrasound (IVUS), optical coherence tomography (OCT), and fractional flow reserve (FFR) measurement, were low in all time periods (Table 2, Table S5, Table S7). In addition, from 2013-2014, thrombolysis in STEMI patients was not altered in terms of performance rate, thrombolytics, and time delay from angina to thrombolysis increased remarkably and the success rate dropped significantly as well (Table S6).

**Table 2. Perioperative characteristics of ACS patients undergoing PCI during 2011-2014**

|               | 2011      |      | 2012      |      | 2013      |      | 2014      |      | <i>P</i> value for trend |
|---------------|-----------|------|-----------|------|-----------|------|-----------|------|--------------------------|
|               | n         | %    | n         | %    | n         | %    | n         | %    |                          |
| pPCI          | 30800     |      | 34974     |      | 39524     |      | 39361     |      |                          |
| Yes           | 3689      | 12.0 | 4359      | 12.5 | 4263      | 10.8 | 4211      | 10.7 | < .0001                  |
| On STEMI      | 2866      | 9.3  | 3499      | 10.0 | 3505      | 8.9  | 3544      | 9.0  | < .01                    |
| pPCI/PCI      | 2866/6514 | 44.0 | 3499/7302 | 47.9 | 3505/7889 | 44.4 | 3544/7856 | 45.1 | .78                      |
| On NSTEMI     | 334       | 1.1  | 372       | 1.1  | 349       | 0.9  | 365       | 0.9  | < .01                    |
| On UAP        | 489       | 1.6  | 488       | 1.4  | 409       | 1.0  | 302       | 0.8  | < .0001                  |
| No            | 27111     | 88.0 | 30615     | 87.5 | 35261     | 89.2 | 35150     | 89.3 |                          |
| Access artery | 30800     |      | 34800     |      | 39524     |      | 39361     |      |                          |
| Radial        | 22171     | 72.0 | 28266     | 81.2 | 34520     | 87.3 | 35582     | 90.4 | < .0001                  |
| Femoral       | 8453      | 27.4 | 6527      | 18.7 | 4803      | 12.2 | 3545      | 9.0  | < .0001                  |
| Brachial      | 165       | 0.5  | 170       | 0.5  | 187       | 0.5  | 209       | 0.5  | .94                      |
| Others        | 11        | 0.0  | 11        | 0.0  | 14        | 0.0  | 25        | 0.1  | .06                      |
| Contrast type | 30080     |      | 34154     |      | 38585     |      | 39361     |      |                          |
| Nonionic      | 30027     | 99.8 | 34119     | 99.9 | 38493     | 99.8 | 39198     | 99.6 | < .0001                  |
| Iso-osmolar   | 10055     | 33.4 | 12988     | 38.0 | 16540     | 42.9 | 20034     | 50.9 | < .0001                  |
| Low-osmolar   | 19972     | 66.4 | 21131     | 61.9 | 21953     | 56.9 | 19164     | 48.7 | < .0001                  |
| Ionic         | 53        | 0.2  | 35        | 0.1  | 92        | 0.2  | 163       | 0.4  | < .0001                  |
| Antiplatelet  | 30800     |      | 34974     |      | 39524     |      | 39361     |      |                          |
| Aspirin       | 29459     | 95.6 | 34189     | 97.8 | 38267     | 96.8 | 38547     | 97.9 | < .0001                  |

|    |                       |       |      |       |      |       |      |       |      |        |
|----|-----------------------|-------|------|-------|------|-------|------|-------|------|--------|
| 1  |                       |       |      |       |      |       |      |       |      |        |
| 2  |                       |       |      |       |      |       |      |       |      |        |
| 3  | Clopidogrel           | 29486 | 95.7 | 34231 | 97.9 | 37165 | 94.0 | 36122 | 91.8 | <.0001 |
| 4  | Ticagrelor            | 30    | 0.1  | 13    | 0.0  | 222   | 0.6  | 1299  | 3.3  | <.0001 |
| 5  | Ticlopidine           | 54    | 0.2  | 50    | 0.1  | 520   | 1.3  | 1202  | 3.1  | <.0001 |
| 6  | Cilostazol            | 22    | 0.1  | 17    | 0.0  | 23    | 0.1  | 15    | 0.0  | .11    |
| 7  | GP IIb/IIIa inhibitor | 4670  | 15.2 | 6232  | 17.8 | 6135  | 15.5 | 5099  | 13.0 | <.0001 |
| 8  | Anticoagulation       | 30800 |      | 34974 |      | 39524 |      | 39361 |      |        |
| 9  | UFH                   | 18788 | 61.0 | 21343 | 61.0 | 22885 | 57.9 | 24547 | 62.4 | .19    |
| 10 | LMWH                  | 9248  | 30.0 | 10398 | 29.7 | 12622 | 31.9 | 12012 | 30.5 | <.01   |
| 11 | Fondaparinux          | 373   | 1.2  | 939   | 2.7  | 886   | 2.2  | 0     | 0.0  | <.0001 |
| 12 | Bivalirudin           | 0     | 0.0  | 0     | 0.0  | 93    | 0.2  | 395   | 1.0  | <.0001 |
| 13 | IABP                  | 30800 |      | 34974 |      | 39524 |      | 39361 |      |        |
| 14 | Yes                   | 450   | 1.5  | 579   | 1.7  | 584   | 1.5  | 432   | 1.1  | <.0001 |
| 15 | No                    | 30350 | 98.5 | 34395 | 98.3 | 38940 | 98.5 | 38929 | 98.9 |        |
| 16 | IVUS                  | 30800 |      | 34974 |      | 39524 |      | 39361 |      |        |
| 17 | Yes                   | 439   | 1.4  | 399   | 1.1  | 383   | 1.0  | 439   | 1.1  | <.0001 |
| 18 | No                    | 30361 | 98.6 | 34575 | 98.9 | 39141 | 99.0 | 38922 | 98.9 |        |

ACS, acute coronary syndrome; GP IIb/IIIa, glycoprotein IIb/IIIa; IABP, intra-aortic balloon pump; IVUS, intravascular ultrasound; LMWH, low molecular weight heparin; NSTEMI, non-ST elevation myocardial infarction; PCI, percutaneous coronary intervention; pPCI, primary percutaneous coronary intervention; STEMI, ST elevation myocardial infarction; UAP, unstable angina pectoris; UFH, unfractionated heparin.

Under catheterization, artery stenosis > 75% increased significantly in proportions during the study years. Long lesion constitutes approximately one third of the overall lesions, there were increased trends in the proportion of general lesion, total occluded lesion, and thrombus lesion, and decreased trends in long lesion, calcified lesion and bifurcation lesion. The proportion of triple-vessel lesion significantly decreased, while that of solitary vessel lesion increased dramatically. Under PCI, target vessels were primarily solitary with increased trends in proportions of all arteries, followed by double vessels with decreased proportions. Target vessels involving LM consist 3.4% to 4.2% of all PCI procedures. PCI procedures targeting triple vessels had also decreased both in amount and in proportion (Table 3). From 2013 to 2014, the mean implanted stent per patient decreased from 1.5 to 1.4 ( $P < .01$ ) (Table S7), the majorities implanted stents were made by domestic companies with a decreased proportion over time (Table S8).

**Table 3. PCI characteristics of ACS patient during 2011-2014**

|  | 2011 | 2012 | 2013 | 2014 | P value |
|--|------|------|------|------|---------|
|--|------|------|------|------|---------|

|                            | n     | %    | n     | %    | n     | %    | n     | %    | for trend |
|----------------------------|-------|------|-------|------|-------|------|-------|------|-----------|
| Artery stenosis            | 39090 |      | 42260 |      | 46915 |      | 46938 |      |           |
| 75-99%                     | 27879 | 71.3 | 31048 | 73.5 | 34976 | 74.6 | 35971 | 76.6 | <.0001    |
| 100%                       | 7228  | 18.5 | 8642  | 20.4 | 9704  | 20.7 | 9385  | 20.0 | <.0001    |
| 50-75%                     | 3557  | 9.1  | 2326  | 5.5  | 2003  | 4.3  | 1540  | 3.3  | <.0001    |
| < 50%                      | 426   | 1.1  | 244   | 0.6  | 232   | 0.5  | 42    | 0.1  | <.0001    |
| Lesion category            | 38606 |      | 41713 |      | 46292 |      | 46073 |      |           |
| Long lesion <sup>#</sup>   | 13571 | 35.2 | 14939 | 35.8 | 16375 | 35.4 | 15736 | 34.2 | <.001     |
| General lesion             | 12686 | 32.9 | 13036 | 31.3 | 14874 | 32.1 | 15878 | 34.5 | <.0001    |
| Total occluded lesion      | 4597  | 11.9 | 5532  | 13.3 | 6058  | 13.1 | 5930  | 12.9 | <.001     |
| Calcified lesion           | 3184  | 8.2  | 3006  | 7.2  | 3473  | 7.5  | 2781  | 6.0  | <.0001    |
| Bifurcation lesion         | 2545  | 6.6  | 2463  | 5.9  | 2479  | 5.4  | 2891  | 6.3  | <.01      |
| Thrombus lesion            | 1782  | 4.6  | 2469  | 5.9  | 2711  | 5.9  | 2549  | 5.5  | <.0001    |
| Small vessel <sup>##</sup> | 217   | 0.6  | 246   | 0.6  | 277   | 0.6  | 272   | 0.6  | .59       |
| Bypass graft lesion        | 24    | 0.1  | 22    | 0.1  | 45    | 0.1  | 36    | 0.1  | .12       |
| Lesion vessel <sup>*</sup> | 30457 |      | 34800 |      | 39427 |      | 39295 |      |           |
| Triple                     | 12298 | 40.4 | 12803 | 36.8 | 13253 | 33.6 | 12301 | 31.3 | <.0001    |
| Solitary                   | 8580  | 28.2 | 11567 | 33.2 | 14395 | 36.5 | 14912 | 37.9 | <.0001    |
| LAD                        | 5397  | 17.7 | 7090  | 20.4 | 8544  | 21.7 | 8599  | 21.9 | <.0001    |
| RCA                        | 2147  | 7.0  | 3111  | 8.9  | 3866  | 9.8  | 4222  | 10.7 | <.0001    |
| LCX                        | 1036  | 3.4  | 1366  | 3.9  | 1985  | 5.0  | 2038  | 5.2  | <.0001    |
| Double                     | 7308  | 24.0 | 8104  | 23.3 | 9180  | 23.3 | 9374  | 23.9 | .84       |
| LAD + RCA                  | 3694  | 12.1 | 3936  | 11.3 | 4270  | 10.8 | 4285  | 10.9 | <.0001    |
| LAD + LCX                  | 2558  | 8.4  | 2968  | 8.5  | 3475  | 8.8  | 3554  | 9.0  | <.001     |
| LCX + RCA                  | 1056  | 3.5  | 1200  | 3.4  | 1435  | 3.6  | 1535  | 3.9  | <.001     |
| Triple + LM                | 1540  | 5.1  | 1481  | 4.3  | 1638  | 4.2  | 1644  | 4.2  | <.0001    |
| Double + LM                | 489   | 1.6  | 502   | 1.4  | 574   | 1.5  | 593   | 1.5  | .41       |
| LAD + LCX + LM             | 230   | 0.8  | 247   | 0.7  | 339   | 0.9  | 315   | 0.8  | .16       |
| LAD + RCA + LM             | 195   | 0.6  | 212   | 0.6  | 198   | 0.5  | 215   | 0.5  | <.05      |
| LCX + RCA + LM             | 64    | 0.2  | 43    | 0.1  | 37    | 0.1  | 63    | 0.2  | .09       |
| Solitary + LM              | 178   | 0.6  | 253   | 0.7  | 300   | 0.8  | 367   | 0.9  | <.0001    |
| LAD + LM                   | 139   | 0.5  | 197   | 0.6  | 220   | 0.6  | 281   | 0.7  | <.0001    |
| RCA + LM                   | 26    | 0.1  | 37    | 0.1  | 51    | 0.1  | 49    | 0.1  | .09       |
| LCX + LM                   | 13    | 0.0  | 19    | 0.1  | 29    | 0.1  | 37    | 0.1  | <.01      |
| LM                         | 64    | 0.2  | 90    | 0.3  | 107   | 0.3  | 128   | 0.3  | <.01      |
| Target vessel <sup>*</sup> | 28278 |      | 32836 |      | 38176 |      | 39224 |      |           |
| Solitary                   | 20801 | 73.6 | 25513 | 77.7 | 30592 | 80.1 | 31456 | 80.2 | <.0001    |
| LAD                        | 10735 | 38.0 | 13277 | 40.4 | 15749 | 41.3 | 15960 | 40.7 | <.0001    |
| LCX                        | 3017  | 10.7 | 3563  | 10.9 | 4665  | 12.2 | 4867  | 12.4 | <.0001    |
| RCA                        | 7049  | 24.9 | 8673  | 26.4 | 10178 | 26.7 | 10629 | 27.1 | <.0001    |
| Double                     | 5713  | 20.2 | 5685  | 17.3 | 5906  | 15.5 | 5886  | 15.0 | <.0001    |
| LAD + LCX                  | 2723  | 9.6  | 2683  | 8.2  | 2865  | 7.5  | 2815  | 7.2  | <.0001    |
| LAD + RCA                  | 1978  | 7.0  | 1937  | 5.9  | 1904  | 5.0  | 1932  | 4.9  | <.0001    |
| LCX + RCA                  | 1012  | 3.6  | 1065  | 3.2  | 1137  | 3.0  | 1139  | 2.9  | <.0001    |

|                |     |     |     |     |     |     |     |     |        |
|----------------|-----|-----|-----|-----|-----|-----|-----|-----|--------|
| Solitary + LM  | 566 | 2.0 | 603 | 1.8 | 690 | 1.8 | 923 | 2.4 | <.001  |
| LAD + LM       | 482 | 1.7 | 531 | 1.6 | 600 | 1.6 | 782 | 2.0 | <.01   |
| LCX + LM       | 68  | 0.2 | 58  | 0.2 | 71  | 0.2 | 123 | 0.3 | <.05   |
| RCA + LM       | 16  | 0.1 | 14  | 0.0 | 19  | 0.0 | 18  | 0.0 | .68    |
| Double + LM    | 483 | 1.7 | 455 | 1.4 | 462 | 1.2 | 464 | 1.2 | <.0001 |
| LAD + LCX + LM | 405 | 1.4 | 375 | 1.1 | 387 | 1.0 | 382 | 1.0 | <.0001 |
| LAD + RCA + LM | 73  | 0.3 | 69  | 0.2 | 69  | 0.2 | 72  | 0.2 | <.05   |
| LCX + RCA + LM | 5   | 0.0 | 11  | 0.0 | 6   | 0.0 | 10  | 0.0 | .92    |
| Triple         | 568 | 2.0 | 433 | 1.3 | 354 | 0.9 | 298 | 0.8 | <.0001 |
| LM             | 97  | 0.3 | 113 | 0.3 | 153 | 0.4 | 173 | 0.4 | <.05   |
| Triple + LM    | 50  | 0.2 | 34  | 0.1 | 19  | 0.0 | 24  | 0.1 | <.0001 |

ACS, acute coronary syndrome; LAD, left anterior descending artery; LCX, left circumflex artery; LM, left main artery; PCI, percutaneous coronary intervention; RCA, right coronary artery; # denotes length of lesion > 20mm; ## denotes vessel diameter < 2.5mm; \* include anomalous artery, intermediate artery, and vessel graft.

In general, more complications were recorded during PCI than post-PCI, and the overall complications were significantly decreased both in amount and in proportion, either during PCI or post-PCI. During PCI procedures, slow flow, serious dissection, acute thrombosis, perforation, and cardiac tamponade had markedly decreased. As for complications after PCI, acute/subacute stent thrombosis, organ failure, major bleeding/hematoma, contrast reaction, and thromboembolism had decreased trends in proportion during the study years. There were also significantly decreased trends of death both in amount and in proportion, during/after PCI, with the majority of death found after PCI procedures due to cardiogenic triggers (Table 4).

**Table 4. In-hospital adverse events of ACS patient undergoing PCI during 2011-2014**

|                    | 2011        |      | 2012        |      | 2013        |      | 2014        |     | P value<br>for trend |
|--------------------|-------------|------|-------------|------|-------------|------|-------------|-----|----------------------|
|                    | (n = 30800) |      | (n = 34974) |      | (n = 39524) |      | (n = 39361) |     |                      |
|                    | n           | %    | n           | %    | n           | %    | n           | %   |                      |
| Complication       | 496         | 16.1 | 539         | 15.4 | 429         | 10.9 | 256         | 6.5 | <.0001               |
| During procedure*  | 342         | 11.1 | 334         | 9.5  | 269         | 6.8  | 151         | 3.8 | <.0001               |
| Slow flow          | 201         | 6.5  | 168         | 4.8  | 159         | 4.0  | 87          | 2.2 | <.0001               |
| Serious dissection | 71          | 2.3  | 75          | 2.1  | 64          | 1.6  | 32          | 0.8 | <.0001               |
| Acute thrombosis   | 54          | 1.8  | 48          | 1.4  | 36          | 0.9  | 23          | 0.6 | <.0001               |
| Perforation        | 22          | 0.7  | 32          | 0.9  | 17          | 0.4  | 17          | 0.4 | <.05                 |
| Cardiac tamponade  | 11          | 0.4  | 17          | 0.5  | 9           | 0.2  | 7           | 0.2 | <.05                 |
| Acute occlusion    | 11          | 0.4  | 24          | 0.7  | 19          | 0.5  | 12          | 0.3 | .38                  |
| Post-procedure     | 154         | 5.0  | 205         | 5.9  | 160         | 4.0  | 105         | 2.7 | <.0001               |
| Acute/subacute ST  | 46          | 1.5  | 49          | 1.4  | 37          | 0.9  | 30          | 0.8 | <.001                |

|                         |     |     |     |     |     |     |     |     |        |
|-------------------------|-----|-----|-----|-----|-----|-----|-----|-----|--------|
| Organ failure           | 37  | 1.2 | 31  | 0.9 | 29  | 0.7 | 19  | 0.5 | <.001  |
| Organ support           | 8   | 0.3 | 2   | 0.0 | 7   | 0.2 | 3   | 0.0 | .15    |
| Major bleeding/hematoma | 19  | 0.6 | 19  | 0.5 | 23  | 0.6 | 6   | 0.2 | <.01   |
| Organ bleeding          | 14  | 0.5 | 21  | 0.6 | 11  | 0.3 | 11  | 0.3 | .06    |
| Postoperative MI        | 10  | 0.3 | 20  | 0.6 | 14  | 0.4 | 7   | 0.2 | .10    |
| Contrast reaction       | 7   | 0.2 | 10  | 0.3 | 3   | 0.0 | 2   | 0.0 | <.01   |
| Postoperative infection | 5   | 0.2 | 6   | 0.2 | 8   | 0.2 | 3   | 0.0 | .40    |
| Thromboembolism         | 4   | 0.1 | 11  | 0.3 | 2   | 0.0 | 2   | 0.0 | <.05   |
| Emergent surgery        | 4   | 0.1 | 2   | 0.0 | 1   | 0.0 | 2   | 0.0 | .18    |
| Others                  | 28  | 0.9 | 56  | 1.6 | 43  | 1.1 | 26  | 0.7 | .06    |
| Death                   | 166 | 5.4 | 179 | 5.1 | 150 | 3.8 | 113 | 2.9 | <.0001 |
| During PCI              | 41  | 1.3 | 30  | 0.9 | 22  | 0.6 | 16  | 0.4 | <.0001 |
| Cardiogenic             |     |     |     |     |     |     |     |     |        |
| Yes                     | 34  | 1.1 | 25  | 0.7 | 16  | 0.4 | 16  | 0.4 | <.0001 |
| No                      | 1   | 0.0 | 1   | 0.0 | 2   | 0.0 | 0   | 0.0 | .52    |
| Uncertain               | 6   | 0.2 | 4   | 0.1 | 4   | 0.1 | 0   | 0.0 | <.05   |
| PCI related             |     |     |     |     |     |     |     |     |        |
| Yes                     | 4   | 0.1 | 1   | 0.0 | 1   | 0.0 | 4   | 0.1 | .76    |
| No                      | 23  | 0.7 | 15  | 0.4 | 11  | 0.3 | 11  | 0.3 | <.01   |
| Uncertain               | 14  | 0.5 | 14  | 0.4 | 10  | 0.3 | 1   | 0.0 | <.001  |
| Post-PCI                | 125 | 4.1 | 149 | 4.3 | 128 | 3.2 | 97  | 2.5 | <.0001 |
| Cardiogenic             |     |     |     |     |     |     |     |     |        |
| Yes                     | 102 | 3.3 | 108 | 3.1 | 108 | 2.7 | 82  | 2.1 | <.01   |
| No                      | 10  | 0.3 | 22  | 0.6 | 8   | 0.2 | 9   | 0.2 | .08    |
| Uncertain               | 13  | 0.4 | 19  | 0.5 | 12  | 0.3 | 6   | 0.2 | <.05   |
| PCI related             |     |     |     |     |     |     |     |     |        |
| Yes                     | 4   | 0.1 | 5   | 0.1 | 7   | 0.2 | 8   | 0.2 | .40    |
| No                      | 88  | 2.9 | 120 | 3.4 | 100 | 2.5 | 80  | 2.0 | <.01   |
| Uncertain               | 33  | 1.1 | 24  | 0.7 | 21  | 0.6 | 9   | 0.2 | <.0001 |

ACS, acute coronary syndrome; MI, myocardial infarction; PCI, percutaneous coronary intervention; ST, stent thrombosis.

## Discussion

To the best of our knowledge, this is the first large, nationwide study of ACS patients undergoing PCI in Chinese military hospitals. Compared with contemporary developed country such as the U.S., the proportion of hospitals capable of performing PCIs more than 400 cases was substantially low (17.1% vs 41.5% in U.S.).<sup>10</sup> Accordingly, the application rates of assisted devices were also low, such as IABP (1.1% to 1.7%), temporary pacemaker (1.9% to 2.4%), IVUS (1.0% to 1.4%), OCT (0.1%), and FFR measurement (0.1% to 0.5%), as these support is available with experienced interventional

1  
2  
3 cardiologists and skilled support staff in high-volume well-equipped facilities. Our data also suggest  
4  
5  
6 great regional disparities of PCI procedures performed on ACS patients, with patients in the north  
7  
8 region of China (North China, Northwest, and Northeast) consumed the majority of interventional  
9  
10 resources (65.5% of all PCI cases). This also reflects pandemic state of unstable coronary artery disease  
11  
12 in these regions.<sup>11-13</sup> In this regard, medical resources shall be prioritized to better serve disparate needs  
13  
14 in different regions, especially the north region of China. Furthermore, the health care coverage system  
15  
16 in contemporary China is also concerning, as during 2013-2014 only 53.4% to 53.6% ACS patients  
17  
18 were covered under urban resident medical service with high reimbursement rate, while 20.1% to 22.1%  
19  
20 patients were covered under new rural cooperative medical service with low reimbursement rate, and  
21  
22 16.3% to 17.2% patients were uncovered.<sup>14-16</sup> Given the great economic burdens ACS patients bear on  
23  
24 PCI procedures and medications during hospitalization and thereafter,<sup>17-19</sup> the current medical coverage  
25  
26 patterns shall be optimized to improve the quality of life for these patients as well as their families.  
27  
28 Nevertheless, the overall decreased trends in proportions of comorbidities suggest the effectiveness of  
29  
30 cardiovascular related disease control during 2011-2014 in China.  
31  
32  
33  
34  
35  
36  
37

38 Primary PCI was performed with high prevalence in hospitals of developed countries. For example,  
39  
40 in a recent nationwide Belgian STEMI registry during 2009-2013, 89.6% of STEMI patients underwent  
41  
42 primary PCI.<sup>20</sup> In the U.S. NCDR 2010-2011 report, the primary PCI consisted 84.8% of all PCI  
43  
44 performed for STEMI patients.<sup>21</sup> However, the proportion of primary PCI performed on STEMI  
45  
46 patients was still very low in this study, and this proportion did not change significantly over time (44.0%  
47  
48 in 2011 to 45.1% in 2014). This could be explained by the low proportion of high-volume PCI-capable  
49  
50 hospitals in China, as these hospitals are well-equipped with experienced interventional cardiologists  
51  
52 and skilled support staff, which are all required for the successful implementation of primary PCI.  
53  
54  
55  
56  
57  
58  
59  
60

1  
2  
3  
4 Nevertheless, median time delay of first medical contract (FMC) to balloon dilation for primary PCIs  
5  
6 done with STEMI patients during 2013-2014 were 50 minutes, which were far below the  
7  
8 guideline-recommended threshold of 90 minutes.<sup>22</sup> This important quality improvement might be  
9  
10 catalyzed by the awareness of the performance metric for participating hospitals, as study demonstrated  
11  
12 that patients treated in hospitals that had been enrolled in the D2B Alliance for > 3 months were  
13  
14 significantly more likely to have D2B times of < 90 minutes than patients treated in non-enrolled  
15  
16 hospitals.<sup>23</sup> In this regard, the scenario of D2B time in real world practice might be less satisfying, as  
17  
18 performance metrics were largely unmonitored. Furthermore, given that time delay of angina onset to  
19  
20 FMC was still huge (median 270 minutes), great efforts are still needed to promote broader initiatives  
21  
22 at a systems level to reduce total ischemic time, which was shown as the principal determinant of  
23  
24 outcome.<sup>24,25</sup> These efforts might include patient education, improvements in emergent medical service  
25  
26 and emergent department care, establishment of networks of non-PCI-capable and PCI-capable  
27  
28 hospitals, and work with policy makers to implement healthcare system reform.<sup>26-32</sup>

29  
30  
31 In a recent large retrospective study, Xin Zheng and colleagues reported dramatic increase of the  
32  
33 adoption of radial artery access from 3.5% to 79.0% in the practice of interventional cardiology in  
34  
35 China during 2001-2011.<sup>6</sup> In this study of ACS patients, the trend is still rising, with 72.0% PCI  
36  
37 procedures accessed via radial artery in 2011 to 90.4% in 2014, compared with 10.9% cases/procedures  
38  
39 performed by means of a radial approach in 2011 to 25.2% in 2014 in the United States [NCDR]. In a  
40  
41 recent meta-analysis of large, high-quality, contemporary randomized studies comparing radial and  
42  
43 femoral access in invasively managed patients with ACS, radial access was found to reduce mortality,  
44  
45 major adverse cardiovascular events, and major bleeding.<sup>33</sup> Similarly, with the rising adoption of radial  
46  
47 access from 2011 to 2014 in this study, the proportion of major bleeding or hematoma after PCI and  
48  
49  
50  
51  
52  
53  
54  
55  
56  
57  
58  
59  
60



1  
2  
3 in-hospital mortality were both significantly decreased over time. In this regard, transradial access shall  
4  
5  
6 be advocated in countries that use it less frequently.  
7

8  
9 Compared with data reported from the NCDR (National Cardiovascular Data Registry) in the U.S.  
10  
11 during 2010-2011,<sup>21</sup> uses of ticagrelor and bivalirudin were extremely low for ACS patients undergoing  
12  
13 PCI during 2011-2014 (less than 3.3% and 1.0%, respectively), although their proportions were rising.  
14  
15 This might be explained by the delayed introduction of these drugs into Chinese pharmaceutical market,  
16  
17 as well as uncovered status under the drug list of Medical Service in China. Given the great  
18  
19 superiorities of these novel antiplatelet and anticoagulation drugs,<sup>1,34</sup> coordinated advocacy efforts are  
20  
21 needed to work with policy makers to include these drugs into the list for coverage, to improve the  
22  
23 quality of care for ACS patients and the outcomes of PCI procedures. The China PEACE-Retrospective  
24  
25 CathPCI Study group recently reported that the proportions of patients who received a glycoprotein  
26  
27 IIb/IIIa inhibitor and clopidogrel both increased from 2001 to 2011 in non-military hospitals in China.<sup>6</sup>  
28  
29 Unlike their findings, in this nationwide study of ACS patients undergoing PCI in military hospitals  
30  
31 from 2011 to 2014, the proportions of clopidogrel and glycoprotein IIb/IIIa inhibitor both decreased  
32  
33 significantly (95.7% to 91.8% and 15.2% to 13.0%, respectively), it might suggest different patterns of  
34  
35 medications between non-military hospitals and military hospitals in the field of interventional  
36  
37 cardiology, or just be a result of rapidly evolved medical practice in all hospitals in contemporary  
38  
39 China, possibly due to the emergence of novel P2Y12 inhibitor ticagrelor and novel anticoagulant  
40  
41 bivalirudin in China.  
42  
43  
44  
45  
46  
47  
48  
49

50  
51 Nevertheless, our data demonstrated great improvement in the quality metrics of PCI procedures  
52  
53 during the study years. The proportion of non-obstructive CAD (stenosis < 50%) was 1.1% in 2011.  
54  
55 Although the proportion is much higher than that reported in NCDR during 2010 to 2011 (0.2%), it has  
56  
57

1  
2  
3  
4 dropped substantially to 0.1% in 2014. Our study also revealed dramatic changes in the pattern of the  
5  
6 extent of CAD, with the dominance of 3-vessel disease in 2011 (40.4%) shifted to the dominance of  
7  
8 1-vessel disease in 2014 (37.9%) and no obvious change in 2-vessel disease (23.3% to 24.0%). This  
9  
10 trend was quite different with distributions found in patients undergoing PCI in the U.S. during  
11  
12 2010-2011 (38.1%, 32.6%, and 39.1% for 1-, 2-, and 3-vessel disease, respectively).<sup>21</sup> In treated lesion  
13  
14 vessels, although there were remarkable increase of 1-vessel disease and significant decreases of 2- and  
15  
16 3-vessel diseases in proportions, interventional operators in Chinese military hospitals still treated  
17  
18 lower proportion of 1-vessel disease and higher proportion of 2-vessel disease in 2014 than peers in the  
19  
20 U.S. during 2010-2011 (80.2% vs 86.2% and 15.0% vs 12.8%, respectively).<sup>21</sup> Meanwhile, operators  
21  
22 implanted less stents per patient in 2014 than in 2013 (mean 1.4 vs 1.5), which was also remarkably  
23  
24 less than those implanted during 2001-2011 in China PEACE study (mean 1.4 in 2001, 1.7 in 2006, and  
25  
26 1.8 in 2011).<sup>6</sup> Of note, the proportion of treated vessels involving left main artery (3.4% to 4.2%) was  
27  
28 significantly higher than proportions reported in the U.S. during 2010-2011 (1.8%)<sup>21</sup> as well as in  
29  
30 Chinese non-military hospitals during 2001-2011 (0.4%-2.1%).<sup>6</sup> The facts that considerable amount of  
31  
32 grade 0-2 TIMI flow before PCI almost disappeared after PCI suggest high quality of performance of  
33  
34 PCI procedures. Especially, compared with data in 2013, higher proportions of grade 0 and 1 TIMI  
35  
36 flow before PCI turned to higher proportion of grade 3 TIMI flow after PCI in 2014, suggesting the  
37  
38 quality of performance was still improving. The relatively low and decreasing rate of overall  
39  
40 complications (1.6% in 2011 to 0.7% in 2014) and death (0.5% in 2011 to 0.3% in 2014) for PCI  
41  
42 procedures might be attributable to the decrease of worse cardiac function over time (patients with  
43  
44 Killip III-IV grades decreased significantly from 2011-2013, Table S3). On the other hand, the  
45  
46 consistent low rates are also suggestive of good performance of cardiac intervention on these patients.  
47  
48  
49  
50  
51  
52  
53  
54  
55  
56

1  
2  
3  
4 Finally, although domestic-made stents consist the majority of stents used during PCI procedures,  
5  
6 their proportion dropped significantly (65.1% in 2013 to 61.8% in 2014), which was quite different  
7  
8 from the scenario of dramatic increase of domestic stents used in non-military hospitals in China during  
9  
10 2001-2011 (1.6% in 2001 to 74.8% in 2011).<sup>6</sup>  
11  
12

13 Some limitations of this study should be noted. First, the partial revision of the registry form in 2013  
14  
15 has made comparisons of some critical measures impossible during 2011-2014 consecutively. However,  
16  
17 the purpose of the necessary revision was to reflect contemporary changes in the practice of cardiac  
18  
19 intervention during the study years. And we analyzed all critical measures provided they were available.  
20  
21 Second, due to the gigantic number of nationwide enrolled patients and limit of sufficient funding and  
22  
23 other resources, we only compared the in-hospital outcomes for the patients. However, it's possible to  
24  
25 follow up the long-term outcomes for these patients, given that contact information of most patients  
26  
27 were collected. Third, in this study comparisons of data with other studies were not matched exactly  
28  
29 both temporally and categorically, as to the best of our knowledge, the same large scale, nationwide  
30  
31 registries of acute coronary syndromes during the same study period were not available. Nevertheless,  
32  
33 we believe this study has given an updated and comprehensive overview of contemporary practice of  
34  
35 interventional cardiology in military hospitals in China.  
36  
37  
38  
39  
40  
41

## 42 **CONCLUSION**

43  
44  
45 This study outlined the general profiles of cardiac intervention practice in contemporary military  
46  
47 hospital in China. Our data revealed the overall interventional resources were still limited, with great  
48  
49 disparities of interventional resources and consumptions in different geographical regions of China, and  
50  
51 major gaps still exist in medical coverage for ACS patients. Nonetheless, our study also demonstrated  
52  
53 notable improvements in the quality of care and major differences in the characteristics of PCI practice  
54  
55  
56  
57

1  
2  
3 compared with contemporary developed countries as well as non-military hospitals in China. Our  
4  
5 findings can serve as an indispensable addition to a comprehensive overview of the practice of cardiac  
6  
7 intervention in China.  
8  
9

10  
11  
12  
13 **Contributors** RZ participated in the data collection and drafted the manuscript. KX participated in the  
14  
15 data collection and design of the study. YL and YH participated in the design of the study and  
16  
17 undertook statistical analyses. All authors were involved in writing the paper and had final approval of  
18  
19 the submitted and published versions.  
20  
21

22  
23 **Funding** The NRCIMH program was supported by the Ministry of Health of the General Logistics  
24  
25 Department of PLA. RZ is funded by a project grant from the Liaoning Office of Science and  
26  
27 Technology of China (Shenyang, China, No.20170540928).  
28  
29

30  
31 **Competing interests** None declared.  
32

33 **Ethics approval** This study was approved by the ethics committee of the General Hospital of  
34  
35 Shenyang Military Region. The requirement of informed consent was waived due to the nature of the  
36  
37 retrospective study. All participating hospitals accepted the ethics committee approval.  
38  
39

40  
41 **Data sharing statement** No additional data are available.  
42  
43

## 44 45 REFERENCES

- 46  
47 1. Han Y, Guo J, Zheng Y, et al. Bivalirudin vs heparin with or without tirofiban during primary  
48  
49 percutaneous coronary intervention in acute myocardial infarction: the BRIGHT randomized  
50  
51 clinical trial. *JAMA*. 2015;313(13):1336-1346.  
52  
53  
54 2. Li Y, Gu J, Zhou J, et al. The epidemiology of traumatic brain injury in civilian inpatients of  
55  
56  
57

- 1  
2  
3 Chinese Military Hospitals 2001-2007. *Brain Inj.* 2015;29(7-8):981-988.  
4  
5  
6 3. Xu J, Qiu J, Zhou J, et al. Pediatric burns in military hospitals of China from 2001 to 2007: a  
7  
8 retrospective study. *Burns.* 2014;40(8):1780-1788.  
9  
10  
11 4. Zhu X, Zhang DZ, et al. Interventional therapy for structural heart diseases in People's Liberation  
12  
13 Army hospitals between 2005 and 2006 [in Chinese]. *Zhonghua Xin Xue Guan Bing Za Zhi.*  
14  
15 2008;36(7):608-612.  
16  
17  
18 5. Rankings of Top Hospitals and Top Specialties in China: Reports from the Institute of Hospital  
19  
20 Administration of Fudan University [in Chinese] 2009-2015.  
21  
22 <http://www.fudanmed.com/institute/news222.aspx#/>. Accessed March 22, 2018.  
23  
24  
25 6. Zheng X, Curtis JP, Hu S, et al. Coronary catheterization and percutaneous coronary intervention  
26  
27 in China: 10-year results from the China PEACE-Retrospective CathPCI Study. *JAMA Intern Med.*  
28  
29 2016;176(4):512-521.  
30  
31  
32 7. Sun Y, Xu K, Jiang TM, et al. Relationship between the degree of target vessel occlusion and the  
33  
34 in-hospital mortality in patients with acute ST-elevated myocardial infarction [in Chinese]. *Med J*  
35  
36 *Chin PLA.* 2016;(6):456-460.  
37  
38  
39 8. Bao D, Xu K, Qiu J, et al. Effect of gender on in-hospital mortality in patients with acute  
40  
41 ST-elevation myocardial infarction undergoing primary percutaneous coronary intervention [in  
42  
43 Chinese]. *Med J Chin PLA.* 2016;41(6):446-451.  
44  
45  
46 9. Zhao R, Xu K, Sun Y, et al. Characteristics of STEMI patients undergoing primary PCI with  
47  
48 different medical insurance coverage from the database of cardiovascular intervention diagnosis  
49  
50 and treatment of PLA [in Chinese]. *Chin J Health Care Med.* 2016;18(5).  
51  
52  
53 10. Masoudi FA, Ponirakis A, de Lemos JA, et al. Trends in U.S. cardiovascular care: 2016 report  
54  
55  
56  
57  
58  
59  
60

- 1  
2  
3 from 4 ACC National Cardiovascular Data Registries. *J Am Coll Cardiol*.  
4  
5  
6 2016;S0735-1097(16):37338-7.  
7
- 8 11. Guo Y, Barnett AG, Pan X, Yu W, Tong S. The impact of temperature on mortality in Tianjin,  
9  
10 China: a case-crossover design with a distributed lag nonlinear model. *Environ Health Perspect*.  
11  
12 2011;119:1719-1725.  
13
- 14 12. Tian Z, Li S, Zhang J, Jaakkola JJ, Guo Y. Ambient temperature and coronary heart disease  
15  
16 mortality in Beijing, China: a time series study. *Environ Health*. 2012;11:11-56.  
17
- 18 13. Yang L, Li L, Lewington S, et al. Outdoor temperature, blood pressure, and cardiovascular disease  
19  
20 mortality among 23000 individuals with diagnosed cardiovascular diseases from China. *Eur Heart*  
21  
22 *J*. 2015;36(19):1178-1185.  
23
- 24 14. Jin Y, Hou Z, Zhang D. Determinants of health insurance coverage among people aged 45 and over  
25  
26 in China: who buys public, private and multiple insurance. *PLoS One*. 2016;11(8):e0161774.  
27
- 28 15. Marten R, McIntyre D, Travassos C, et al. An assessment of progress towards universal health  
29  
30 coverage in Brazil, Russia, India, China, and South Africa (BRICS). *The*  
31  
32 *Lancet*. 2014;384(9960):2164-2171.  
33
- 34 16. Shi L, Zhang D. China's new rural cooperative medical scheme and underutilization of medical  
35  
36 care among adults over 45: evidence from CHARLS pilot data. *The Journal of Rural Health*. 2013;  
37  
38 29(s1):s51-s61.  
39
- 40 17. Ben-Yehuda O, Kazi DS, Bonafede M, et al. Angina and associated healthcare costs following  
41  
42 percutaneous coronary intervention: a real-world analysis from a multi-payer database. *Catheter*  
43  
44 *Cardiovasc Interv*. 2016;88(7):1017-1024.  
45
- 46 18. Hyun KK, Essue BM, Woodward M, et al. The household economic burden for acute coronary  
47  
48  
49  
50  
51  
52  
53  
54  
55  
56

- 1  
2  
3 syndrome survivors in Australia. *BMC Health Serv Res.* 2016;16(1):636.  
4  
5  
6 19. Kim J, Lee E, Lee T, Sohn A. Economic burden of acute coronary syndrome in South Korea: a  
7  
8 national survey. *BMC Cardiovasc Disord.* 2013;13:55.  
9  
10  
11 20. Argacha JF, Collart P, Wauters A, et al. Air pollution and ST-elevation myocardial infarction: a  
12  
13 case-crossover study of the Belgian STEMI registry 2009-2013. *Int J Cardiol.* 2016;223:300-305.  
14  
15  
16 21. Dehmer GJ, Weaver D, Roe MT, et al. A contemporary view of diagnostic cardiac catheterization  
17  
18 and percutaneous coronary intervention in the United States: a report from the CathPCI Registry of  
19  
20 the National Cardiovascular Data Registry, 2010 through June 2011. *J Am Coll Cardiol.*  
21  
22 2012;60(20):2017-2031.  
23  
24  
25 22. O’Gara PT, Kushner FG, Ascheim DD, et al. 2013 ACCF/AHA guideline for the management of  
26  
27 ST-elevation myocardial infarction: a report of the American College of Cardiology  
28  
29 Foundation/American Heart Association Task Force on Practice Guidelines. *Circulation.*  
30  
31 2013;127(4):e362-425.  
32  
33  
34  
35 23. Bradley EH, Nallamothu BK, Stern AF, et al. The Door-to-Balloon Alliance for Quality: who joins  
36  
37 national collaborative efforts and why? *Jt Comm J Qual Patient Saf.* 2009;35:93-9.  
38  
39  
40 24. Armstrong PW, Boden WE. Reperfusion paradox in ST-segment elevation myocardial infarction.  
41  
42 *Ann Intern Med.* 2011;155:389-391.  
43  
44  
45 25. Bates ER, Nallamothu BK. Commentary: the role of percutaneous coronary intervention in  
46  
47 ST-segment-elevation myocardial infarction. *Circulation.* 2008;118:567-573.  
48  
49  
50 26. Henry TD, Sharkey SW, Burke MN, et al. A regional system to provide timely access to  
51  
52 percutaneous coronary intervention for ST-elevation myocardial infarction. *Circulation.*  
53  
54 2007;116:721-728.  
55  
56  
57  
58  
59  
60

- 1  
2  
3  
4 27. Jollis JG, Roettig ML, Aluko AO, et al. Implementation of a statewide system for coronary  
5  
6 reperfusion for ST-segment elevation myocardial infarction. *JAMA*. 2007;298:2371-80.  
7  
8  
9 28. Jacobs AK. Primary percutaneous coronary intervention without cardiac surgery on-site: coming to  
10  
11 a hospital near you? *Am Heart J*. 2008;155:585-588.  
12  
13 29. Jollis JG, Mehta RH, Roettig ML, et al. Reperfusion of acute myocardial infarction in North  
14  
15 Carolina emergency departments (RACE): study design. *Am Heart J*. 2006;152:851.e1-11.  
16  
17  
18 30. Kalla K, Christ G, Karnik R, et al. Implementation of guidelines improves the standard of care: the  
19  
20 Viennese registry on reperfusion strategies in ST-elevation myocardial infarction (Vienna STEMI  
21  
22 registry). *Circulation*. 2006;113:2398-2405.  
23  
24  
25 31. Rokos IC, Larson DM, Henry TD, et al. Rationale for establishing regional ST-elevation  
26  
27 myocardial infarction receiving center (SRC) networks. *Am Heart J*. 2006;152:661-667.  
28  
29  
30 32. Ting HH, Rihal CS, Gersh BJ, et al. Regional systems of care to optimize timeliness of reperfusion  
31  
32 therapy for ST-elevation myocardial infarction: the Mayo Clinic STEMI Protocol. *Circulation*.  
33  
34 2007;116:729-36.  
35  
36  
37 33. Ando G, Capodanno D. Radial versus femoral access in invasively managed patients with acute  
38  
39 coronary syndrome. *Ann Intern Med*. 2015;163:932-940.  
40  
41  
42 34. Wallentin L, Becker RC, Budaj A, et al. Ticagrelor versus clopidogrel in patients with acute  
43  
44 coronary syndromes. *N Engl J Med*. 2009;361:1045-57.  
45  
46  
47  
48  
49

## 50 **Figure Legends**

51  
52 **Figure 1. Overall and regional distributions of PCI-capable military hospitals and PCI**  
53  
54 **procedures performed.**  
55



1  
2  
3 Military hospitals were divided by their annual PCI volume with a threshold of 400 cases per year (A),  
4  
5  
6 as well as further by geographical regions (C); The overall PCI procedures performed during  
7  
8 2011-2014 were also grouped by annual PCI volumes of hospitals (B), and by regions (D). Northern  
9  
10 China include North China, Northwest China and Northeast China, Southern China include South  
11  
12 China, East China, Central China, and Southwest China.  
13  
14  
15  
16  
17  
18  
19  
20  
21  
22  
23  
24  
25  
26  
27  
28  
29  
30  
31  
32  
33  
34  
35  
36  
37  
38  
39  
40  
41  
42  
43  
44  
45  
46  
47  
48  
49  
50  
51  
52  
53  
54  
55  
56  
57  
58  
59  
60

For peer review only

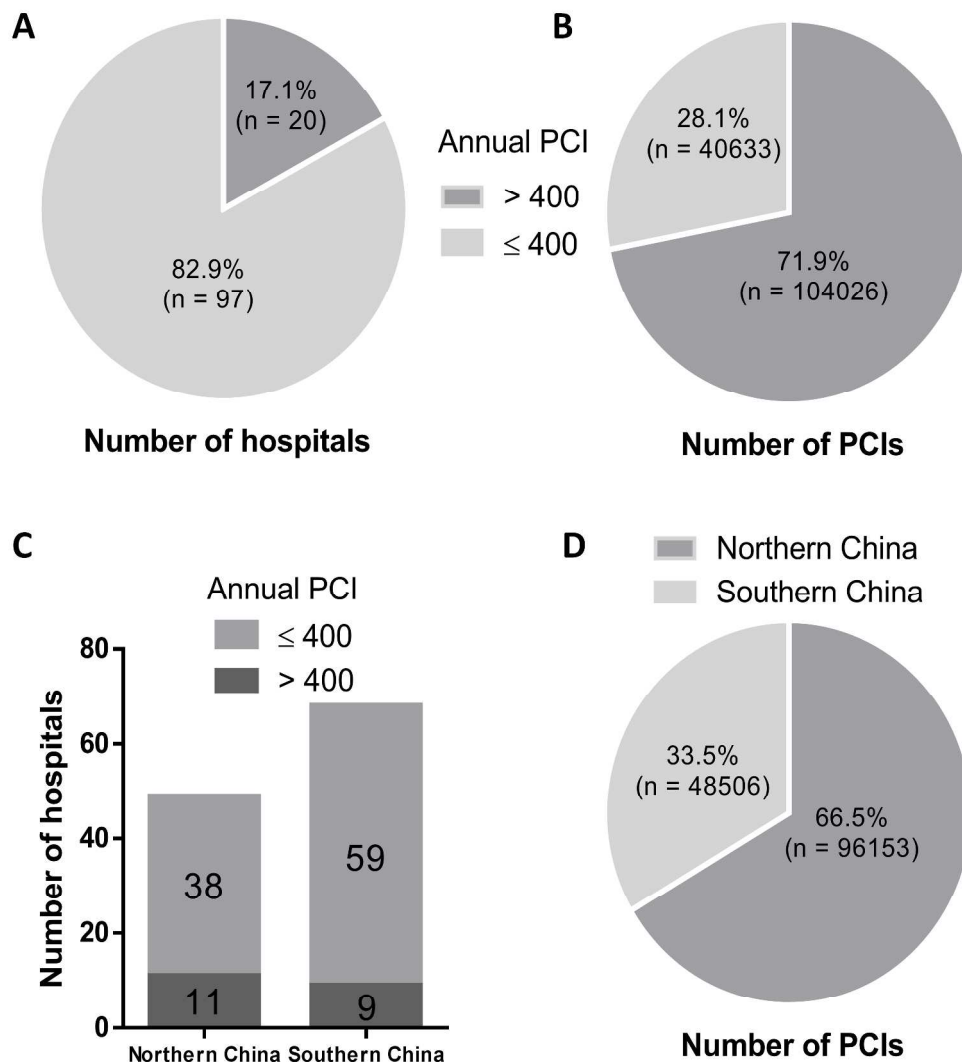

Figure 1. Overall and regional distributions of PCI-capable military hospitals and PCI procedures performed. Military hospitals were divided by their annual PCI volume with a threshold of 400 cases per year (A), as well as further by geographical regions (C); The overall PCI procedures performed during 2011-2014 were also grouped by annual PCI volumes of hospitals (B), and by regions (D). Northern China include North China, Northwest China and Northeast China, Southern China include South China, East China, Central China, and Southwest China.

868x961mm (96 x 96 DPI)

**Table S1. Distribution of ACS patients undergoing PCI in participated hospitals during 2011-2014**

| Hospital                                            | Region      | 2011 | 2012 | 2013 | 2014 |
|-----------------------------------------------------|-------------|------|------|------|------|
| General Hospital of Shenyang Military Region        | Northeast   | 3118 | 4198 | 5597 | 6103 |
| The 463 Hospital                                    | Northeast   | 224  | 332  | 250  | 374  |
| The 210 Hospital                                    | Northeast   | 190  | 197  | 211  | 207  |
| The 313 Hospital                                    | Northeast   | 130  | 237  | 305  | 277  |
| The 202 Hospital                                    | Northeast   | 115  | 139  | 111  | 154  |
| The 208 Hospital                                    | Northeast   | 80   | 113  | 77   | 48   |
| The 211 Hospital                                    | Northeast   | 59   | 73   | 71   | 50   |
| The 201 Hospital                                    | Northeast   | 7    | 33   | 20   | 10   |
| The 205 Hospital                                    | Northeast   | 1    | 25   | 47   | 61   |
| General Hospital of Jilin PAP Corps                 | Northeast   | 0    | 0    | 2    | 0    |
| General Hospital of PLA                             | North China | 2094 | 1993 | 1782 | 2562 |
| The Affiliated Hospital of PAP College of Logistics | North China | 1602 | 1324 | 1355 | 1391 |
| Bethune International Peace Hospital                | North China | 927  | 855  | 1009 | 950  |
| General Hospital of PAP                             | North China | 859  | 753  | 757  | 974  |
| The 252 Hospital                                    | North China | 675  | 749  | 848  | 933  |
| General Hospital of Navy                            | North China | 482  | 667  | 623  | 791  |
| The 304 Hospital                                    | North China | 398  | 502  | 263  | 254  |
| The 254 Hospital                                    | North China | 391  | 166  | 158  | 258  |
| The 309 Hospital                                    | North China | 312  | 376  | 435  | 295  |
| The General Hospital of Beijing Military Region     | North China | 240  | 372  | 408  | 488  |
| The Second Artillery General Hospital               | North China | 236  | 188  | 215  | 181  |
| General Hospital of Air Force                       | North China | 218  | 221  | 293  | 407  |
| The 305 Hospital                                    | North China | 213  | 257  | 429  | 492  |
| The 306 Hospital                                    | North China | 192  | 367  | 386  | 368  |
| The 307 Hospital                                    | North China | 125  | 137  | 126  | 102  |
| The 264 Hospital                                    | North China | 75   | 101  | 142  | 177  |
| The 261 Hospital                                    | North China | 68   | 59   | 43   | 48   |
| The 251 Hospital                                    | North China | 49   | 5    | 97   | 0    |
| The 263 Hospital                                    | North China | 0    | 0    | 21   | 48   |
| The 285 Hospital                                    | North China | 0    | 59   | 100  | 67   |
| The 464 Hospital                                    | North China | 0    | 86   | 139  | 70   |
| The Second Hospital of Beijing PAP Corps            | North China | 0    | 34   | 13   | 30   |
| General Hospital of Beijing PAP Corps               | North China | 0    | 35   | 37   | 33   |
| General Hospital of Hebei PAP Corps                 | North China | 0    | 89   | 56   | 5    |
| General Hospital of Shanxi PAP Corps                | North China | 0    | 236  | 179  | 162  |
| Changhai Hospital of SMMU                           | East China  | 750  | 1206 | 1320 | 1828 |
| General Hospital of Nanjing Military Region         | East China  | 581  | 621  | 470  | 486  |
| General Hospital of Jinan Military Region           | East China  | 472  | 393  | 267  | 335  |
| Changzheng Hospital of SMMU                         | East China  | 337  | 362  | 499  | 375  |
| The 88 Hospital                                     | East China  | 209  | 193  | 168  | 135  |
| The 148 Hospital                                    | East China  | 186  | 203  | 166  | 165  |

|    |                                               |               |     |     |     |     |
|----|-----------------------------------------------|---------------|-----|-----|-----|-----|
| 1  |                                               |               |     |     |     |     |
| 2  |                                               |               |     |     |     |     |
| 3  |                                               |               |     |     |     |     |
| 4  | The 105 Hospital                              | East China    | 164 | 70  | 64  | 152 |
| 5  | The 401 Hospital                              | East China    | 162 | 144 | 92  | 33  |
| 6  | The 97 Hospital                               | East China    | 162 | 197 | 260 | 194 |
| 7  | Fuzhou General Hospital of PLA                | East China    | 158 | 196 | 344 | 272 |
| 8  | Anqing Hospital of Navy                       | East China    | 91  | 62  | 59  | 74  |
| 9  |                                               |               |     |     |     |     |
| 10 | The 101 Hospital                              | East China    | 71  | 96  | 107 | 114 |
| 11 | The 89 Hospital                               | East China    | 67  | 46  | 68  | 62  |
| 12 | The 107 Hospital                              | East China    | 65  | 113 | 181 | 40  |
| 13 | The 171 Hospital                              | East China    | 59  | 70  | 105 | 72  |
| 14 | The 404 Hospital                              | East China    | 50  | 98  | 73  | 78  |
| 15 | The 94 Hospital                               | East China    | 41  | 68  | 84  | 116 |
| 16 | The 411 Hospital                              | East China    | 37  | 38  | 53  | 64  |
| 17 | The 174 Hospital                              | East China    | 24  | 120 | 91  | 88  |
| 18 |                                               |               |     |     |     |     |
| 19 | The 180 Hospital                              | East China    | 19  | 65  | 122 | 136 |
| 20 | The 85 Hospital                               | East China    | 11  | 45  | 52  | 24  |
| 21 | The 98 Hospital                               | East China    | 10  | 9   | 10  | 42  |
| 22 | The 117 Hospital                              | East China    | 9   | 18  | 16  | 20  |
| 23 | General Hospital of Zhejiang PAP Corps        | East China    | 7   | 71  | 70  | 47  |
| 24 | The 123 Hospital                              | East China    | 0   | 42  | 70  | 54  |
| 25 | The 175 Hospital                              | East China    | 0   | 18  | 117 | 91  |
| 26 | The 456 Hospital                              | East China    | 0   | 6   | 6   | 10  |
| 27 | The 92 Hospital                               | East China    | 0   | 49  | 102 | 112 |
| 28 | General Hospital of Fujian PAP Corps          | East China    | 0   | 11  | 17  | 22  |
| 29 | General Hospital of Guangzhou Military Region | South China   | 685 | 830 | 830 | 713 |
| 30 | The 181 Hospital                              | South China   | 54  | 55  | 56  | 44  |
| 31 | The 303 Hospital                              | South China   | 49  | 7   | 48  | 62  |
| 32 | The 458 Hospital                              | South China   | 32  | 32  | 97  | 78  |
| 33 | The 163 Hospital                              | South China   | 17  | 57  | 42  | 13  |
| 34 | The 169 Hospital                              | South China   | 0   | 7   | 5   | 3   |
| 35 | General Hospital of Guangdong PAP Corps       | South China   | 0   | 112 | 211 | 195 |
| 36 | General Hospital of Hunan PAP Corps           | South China   | 0   | 49  | 44  | 22  |
| 37 | The 425 Hospital                              | South China   | 0   | 0   | 18  | 0   |
| 38 | The 187 Hospital                              | South China   | 0   | 0   | 0   | 40  |
| 39 | The 422 Hospital                              | South China   | 0   | 0   | 0   | 104 |
| 40 | The 425 Hospital                              | South China   | 0   | 0   | 0   | 16  |
| 41 | Hainan Hospital of General Hospital of PLA    | South China   | 0   | 0   | 0   | 146 |
| 42 | Wuhan General Hospital of PLA                 | Central China | 482 | 394 | 482 | 462 |
| 43 | The 150 Hospital                              | Central China | 460 | 244 | 124 | 484 |
| 44 | The 91 Hospital                               | Central China | 371 | 479 | 465 | 270 |
| 45 | The 153 Hospital                              | Central China | 183 | 180 | 76  | 93  |
| 46 | The 371 Hospital                              | Central China | 153 | 170 | 216 | 48  |
| 47 | General Hospital of Henan PAP Corps           | Central China | 145 | 91  | 142 | 52  |
| 48 | The 152 Hospital                              | Central China | 70  | 62  | 39  | 89  |
| 49 | The 155 Hospital                              | Central China | 47  | 132 | 132 | 147 |
| 50 |                                               |               |     |     |     |     |
| 51 |                                               |               |     |     |     |     |
| 52 |                                               |               |     |     |     |     |
| 53 |                                               |               |     |     |     |     |
| 54 |                                               |               |     |     |     |     |
| 55 |                                               |               |     |     |     |     |
| 56 |                                               |               |     |     |     |     |
| 57 |                                               |               |     |     |     |     |
| 58 |                                               |               |     |     |     |     |
| 59 |                                               |               |     |     |     |     |
| 60 |                                               |               |     |     |     |     |

|    |                                                 |               |      |      |      |      |
|----|-------------------------------------------------|---------------|------|------|------|------|
| 1  |                                                 |               |      |      |      |      |
| 2  |                                                 |               |      |      |      |      |
| 3  |                                                 |               |      |      |      |      |
| 4  | The 161 Hospital                                | Central China | 47   | 77   | 66   | 76   |
| 5  | The 159 Hospital                                | Central China | 19   | 38   | 67   | 23   |
| 6  | General Hospital of Hubei PAP Corps             | Central China | 0    | 61   | 101  | 75   |
| 7  | The 477 Hospital                                | Central China | 0    | 0    | 0    | 125  |
| 8  | Xijing Hospital of FMMU                         | Northwest     | 4438 | 4514 | 5456 | 5326 |
| 9  | Tangdu Hospital of FMMU                         | Northwest     | 998  | 1287 | 1749 | 325  |
| 10 | General Hospital of Lanzhou Military Region     | Northwest     | 762  | 685  | 784  | 749  |
| 11 | Urumchi General Hospital of PLA                 | Northwest     | 469  | 489  | 623  | 617  |
| 12 | General Hospital of Shannxi PAP Corps           | Northwest     | 452  | 362  | 415  | 166  |
| 13 | The 451 Hospital                                | Northwest     | 182  | 157  | 181  | 125  |
| 14 | The 3 Hospital                                  | Northwest     | 105  | 86   | 84   | 47   |
| 15 | The 474 Hospital                                | Northwest     | 94   | 113  | 157  | 175  |
| 16 | The 323 Hospital                                | Northwest     | 74   | 105  | 109  | 97   |
| 17 | The 273 Hospital                                | Northwest     | 58   | 57   | 95   | 113  |
| 18 | The 18 Hospital                                 | Northwest     | 0    | 4    | 9    | 20   |
| 19 | General Hospital of Ningxia PAP Corps           | Northwest     | 0    | 48   | 38   | 9    |
| 20 | General Hospital of Xinjiang PAP Corps          | Northwest     | 0    | 32   | 28   | 33   |
| 21 | The 1 Hospital                                  | Northwest     | 0    | 0    | 0    | 19   |
| 22 | Kunming General Hospital of PLA                 | Southwest     | 926  | 878  | 1102 | 993  |
| 23 | Xinqiao Hospital of TMMU                        | Southwest     | 816  | 1130 | 1125 | 1393 |
| 24 | Southwest Hospital of TMMU                      | Southwest     | 790  | 903  | 863  | 364  |
| 25 | Daping Hospital of TMMU                         | Southwest     | 602  | 742  | 846  | 820  |
| 26 | The General Hospital of Chengdu Military Region | Southwest     | 237  | 543  | 748  | 733  |
| 27 | The 452 Hospital                                | Southwest     | 79   | 53   | 42   | 81   |
| 28 | The 59 Hospital                                 | Southwest     | 42   | 47   | 44   | 34   |
| 29 | Tibet General Hospital of PLA                   | Southwest     | 23   | 0    | 0    | 0    |
| 30 | The 324 Hospital                                | Southwest     | 0    | 0    | 21   | 29   |
| 31 | The 37 Hospital                                 | Southwest     | 0    | 15   | 4    | 19   |
| 32 | The 44 Hospital                                 | Southwest     | 0    | 4    | 21   | 15   |
| 33 | Chengdu Hospital of Sichuan PAP Corps           | Southwest     | 0    | 0    | 4    | 0    |
| 34 | General Hospital of Sichuan PAP Corps           | Southwest     | 0    | 27   | 57   | 68   |
| 35 | Leshan Hospital of Sichuan PAP Corps            | Southwest     | 0    | 4    | 0    | 0    |

ACS, acute coronary syndrome; PAP, people's armed police; PCI, percutaneous coronary intervention; PLA, people's liberty army; FMMU, fourth military medical university; SMMU, second military medical university; TMMU, third military medical university.

**Table S2. Medical coverage of ACS patients undergoing PCI during 2013-2014**

|                          | 2013* |      | 2014  |      | <i>P</i> |
|--------------------------|-------|------|-------|------|----------|
|                          | n     | %    | n     | %    |          |
| Medical coverage         | 18217 |      | 39361 |      |          |
| Urban resident MS        | 9728  | 53.4 | 21083 | 53.6 | .72      |
| New rural cooperative MS | 3665  | 20.1 | 8714  | 22.1 | < .0001  |
| Self-paid                | 3136  | 17.2 | 6401  | 16.3 | < .01    |
| Free MS                  | 572   | 3.1  | 915   | 2.3  | < .0001  |

|                      |     |     |      |     |         |
|----------------------|-----|-----|------|-----|---------|
| Commercial insurance | 518 | 2.8 | 911  | 2.3 | .0001   |
| Others               | 793 | 4.4 | 2043 | 5.2 | < .0001 |

ACS, acute coronary syndrome; MS, medical service; PCI, percutaneous coronary intervention;

\*Data were from part of 2013, not from the calendar year due to a systematic revision of the registry form since 2013.

**Table S3. Distribution of location of prior MI and Killip classification of ACS patients undergoing PCI during 2011-2013**

|                       | 2011 |      | 2012 |      | 2013* |      | P value for trend |
|-----------------------|------|------|------|------|-------|------|-------------------|
|                       | n    | %    | n    | %    | n     | %    |                   |
| <b>Prior MI</b>       |      |      |      |      |       |      |                   |
| Location              | 5306 |      | 5355 |      | 3255  |      |                   |
| Inferior              | 2449 | 46.2 | 2520 | 47.1 | 1458  | 44.8 | .33               |
| Anterior              | 2189 | 41.3 | 2261 | 42.2 | 1450  | 44.5 | < .01             |
| Anteroseptal          | 424  | 8.0  | 361  | 6.7  | 176   | 5.4  | < .0001           |
| Posterior             | 114  | 2.1  | 99   | 1.8  | 85    | 2.6  | .26               |
| Anterolateral         | 103  | 1.9  | 85   | 1.6  | 47    | 1.4  | .07               |
| Right ventricular     | 27   | 0.5  | 29   | 0.5  | 39    | 1.2  | < .001            |
| Killip classification | 5497 |      | 5897 |      | 4035  |      |                   |
| I                     | 2034 | 37.0 | 2382 | 40.4 | 1499  | 37.1 | .59               |
| II                    | 2405 | 43.8 | 2454 | 41.6 | 1986  | 49.2 | < .0001           |
| III                   | 768  | 14.0 | 792  | 13.4 | 437   | 10.8 | < .0001           |
| IV                    | 290  | 5.3  | 269  | 4.6  | 113   | 2.8  | < .0001           |

ACS, acute coronary syndrome; MI, myocardial infarction; PCI, percutaneous coronary intervention; \* Data

were from part of 2013, not from the calendar year due to a systematic revision of the registry form since 2013.

**Table S4. Time delay of STEMI patients undergoing primary PCI during 2013-2014**

|                         | 2013*         |  | 2014          |  | P     |
|-------------------------|---------------|--|---------------|--|-------|
|                         | Median (IQR)  |  | Median (IQR)  |  |       |
|                         | (n = 1495)    |  | (n = 3484)    |  |       |
| <b>Time delay, mins</b> |               |  |               |  |       |
| Angina to Balloon       | 270 (190-415) |  | 270 (190-421) |  | .65   |
| Angina to FMC           | 225 (130-350) |  | 220 (121-360) |  | .53   |
| FMC to Balloon          | 40 (30-70)    |  | 50 (30-75)    |  | < .01 |

FMC, first medical contact; IQR, interquartile range; MS, medical service; PCI, percutaneous coronary intervention;

STEMI, ST elevation myocardial infarction; \* Data were from part of 2013, not from the calendar

year due to a systematic revision of the registry form since 2013.

**Table S5. Assisted device applied perioperatively in ACS patients undergoing PCI during 2011-2013**

|                     | 2011  |     | 2012  |     | 2013* |     | P value for trend |
|---------------------|-------|-----|-------|-----|-------|-----|-------------------|
|                     | n     | %   | n     | %   | n     | %   |                   |
| Assisted device     | 30800 |     | 34974 |     | 21307 |     |                   |
| Temporary pacemaker | 730   | 2.4 | 797   | 2.3 | 395   | 1.9 | < .001            |
| OCT                 | 19    | 0.1 | 43    | 0.1 | 30    | 0.1 | < .01             |

ACS, acute coronary syndrome; OCT, optical coherence tomography; PCI, percutaneous coronary intervention;

\*Data were from part of 2013, not from the calendar year due to a systematic revision of the registry form since 2013.

**Table S6. Thrombolysis of STEMI patients during 2013-2014**

|                               | 2013*        |      | 2014          |      | <i>P</i> |
|-------------------------------|--------------|------|---------------|------|----------|
|                               | n            | %    | n             | %    |          |
| Thrombolysis                  | 3564         |      | 7856          |      |          |
| Yes                           | 52           | 1.5  | 118           | 1.5  | .86      |
| No                            | 3512         | 98.5 | 7738          | 98.5 |          |
| Thrombolytic                  | 52           |      | 118           |      |          |
| Urokinase                     | 33           | 63.5 | 67            | 56.8 | .41      |
| Reteplase                     | 8            | 15.4 | 17            | 14.4 | .87      |
| Alteplase                     | 4            | 7.7  | 17            | 14.4 | .31      |
| Prourokinase                  | 3            | 5.8  | 12            | 10.2 | .56      |
| Others                        | 4            | 7.7  | 5             | 4.2  | .46      |
| Time delay, mins <sup>#</sup> |              |      |               |      |          |
| Angina to thrombolysis        | 150 (89-223) |      | 190 (130-301) |      | < .05    |
| Angina to FMC                 | 120 (60-210) |      | 160 (80-270)  |      | .08      |
| FMC to thrombolysis           | 30 (20-33)   |      | 30 (20-40)    |      | .64      |
| Thrombolysis success          | 52           |      | 118           |      |          |
| Yes                           | 44           | 84.6 | 73            | 61.9 | < .01    |
| No                            | 8            | 15.4 | 45            | 38.1 |          |

FMC, first medical contact; STEMI, ST elevation myocardial infarction; \*Data were from part of 2013, not from all of the calendar year due to a systematic revision of the registry form since 2013;

<sup>#</sup> data in the subitems were shown as median (interquartile).

**Table S7. PCI outcomes of ACS patients during 2013-2014**

|                               | 2013* |      | 2014  |      | <i>P</i> |
|-------------------------------|-------|------|-------|------|----------|
|                               | n     | %    | n     | %    |          |
| TIMI flow pre-PCI             | 21710 |      | 46928 |      |          |
| 0                             | 4254  | 19.6 | 10840 | 23.1 | < .0001  |
| 1                             | 2139  | 9.9  | 6763  | 14.4 | < .0001  |
| 2                             | 2850  | 13.1 | 4909  | 10.5 | < .0001  |
| 3                             | 12467 | 57.4 | 24416 | 52.0 | < .0001  |
| TIMI flow post-PCI            | 21705 |      | 46922 |      |          |
| 0                             | 347   | 1.6  | 645   | 1.4  | < .05    |
| 1                             | 82    | 0.4  | 183   | 0.4  | .81      |
| 2                             | 283   | 1.3  | 374   | 0.8  | < .0001  |
| 3                             | 20993 | 96.7 | 45720 | 97.4 | < .0001  |
| Guiding wire through lesion   | 21670 |      | 46890 |      |          |
| Yes                           | 21322 | 98.4 | 46184 | 98.5 | .32      |
| No                            | 348   | 1.6  | 706   | 1.5  |          |
| Stent restenosis <sup>#</sup> | 21734 |      | 46930 |      |          |
| Yes                           | 354   | 1.6  | 857   | 1.8  | .07      |
| No                            | 21380 | 98.4 | 46073 | 98.2 |          |
| Residual stenosis of lesion   | 21660 |      | 46892 |      |          |

|                                       |                  |      |                  |      |         |
|---------------------------------------|------------------|------|------------------|------|---------|
| < 10%                                 | 19912            | 91.9 | 45367            | 96.7 | < .0001 |
| 10-50%                                | 763              | 3.5  | 537              | 1.1  | < .0001 |
| > 50%                                 | 985              | 4.5  | 988              | 2.1  | < .0001 |
| FFR applied                           | 21756            |      | 46938            |      |         |
| Yes                                   | 107              | 0.5  | 189              | 0.4  | .10     |
| No                                    | 21649            | 99.5 | 46749            | 99.6 |         |
| Luminal stenosis by IVUS              | 178              |      | 439              |      |         |
| Percentage, %                         | 76 (70-85)       |      | 77 (71-83)       |      | .52     |
| Minimal luminal area, mm <sup>2</sup> | 3.04 (2.68-4.00) |      | 3.25 (2.60-4.00) |      | .59     |
| Implanted stent per patient**         | 1.5 ±0.7         |      | 1.4 ±0.7         |      | < .01   |

ACS, acute coronary syndrome; IVUS, intravascular ultrasound; FFR, fractional flow reserve; PCI, percutaneous coronary intervention; TIMI, thrombolysis in myocardial infarction; \* Data were from part of 2013, not from the calendar year due to a systematic revision of the registry form since 2013; # within lesion categories; \*\* Mean ±SD, n = 19363, 42299 in 2013-2014, respectively.

**Table S8. Stent manufacturer of ACS patients undergoing PCI during 2013-2014**

|                    | 2013* |      | 2014  |      | P       |
|--------------------|-------|------|-------|------|---------|
|                    | n     | %    | n     | %    |         |
| Stent manufacturer | 28181 |      | 60847 |      |         |
| Domestic           | 18345 | 65.1 | 37591 | 61.8 | < .0001 |
| MicroPort          | 6855  | 24.3 | 13862 | 22.8 | < .0001 |
| JW Medical         | 6678  | 23.7 | 13214 | 21.7 | < .0001 |
| Lepu Medical       | 4503  | 16.0 | 9868  | 16.2 | .37     |
| Yinyi Biotech      | 309   | 1.1  | 647   | 1.1  | .66     |
| Foreign            | 6550  | 23.2 | 14931 | 24.5 | < .0001 |
| Abbott             | 3164  | 11.2 | 6943  | 11.4 | .42     |
| Medtronic          | 2464  | 8.7  | 5514  | 9.1  | .12     |
| Boston scientific  | 922   | 3.3  | 2474  | 4.1  | < .0001 |
| Others             | 3286  | 11.7 | 8325  | 13.7 | < .0001 |

ACS, acute coronary syndrome; PCI, percutaneous coronary intervention; \* Data were from part of 2013, not from the calendar year due to a systematic revision of the registry form since 2013.



**STROBE 2007 (v4) Statement—Checklist of items that should be included in reports of *cross-sectional studies***

| Section/Topic                | Item # | Recommendation                                                                                                                                                                       | Reported on page # |
|------------------------------|--------|--------------------------------------------------------------------------------------------------------------------------------------------------------------------------------------|--------------------|
| <b>Title and abstract</b>    | 1      | (a) Indicate the study’s design with a commonly used term in the title or the abstract                                                                                               | 2                  |
|                              |        | (b) Provide in the abstract an informative and balanced summary of what was done and what was found                                                                                  | 2                  |
| <b>Introduction</b>          |        |                                                                                                                                                                                      |                    |
| Background/rationale         | 2      | Explain the scientific background and rationale for the investigation being reported                                                                                                 | 3                  |
| Objectives                   | 3      | State specific objectives, including any prespecified hypotheses                                                                                                                     | 3                  |
| <b>Methods</b>               |        |                                                                                                                                                                                      |                    |
| Study design                 | 4      | Present key elements of study design early in the paper                                                                                                                              | 4                  |
| Setting                      | 5      | Describe the setting, locations, and relevant dates, including periods of recruitment, exposure, follow-up, and data collection                                                      | 4                  |
| Participants                 | 6      | (a) Give the eligibility criteria, and the sources and methods of selection of participants                                                                                          | 4                  |
| Variables                    | 7      | Clearly define all outcomes, exposures, predictors, potential confounders, and effect modifiers. Give diagnostic criteria, if applicable                                             | 4,5                |
| Data sources/<br>measurement | 8*     | For each variable of interest, give sources of data and details of methods of assessment (measurement). Describe comparability of assessment methods if there is more than one group | 5                  |
| Bias                         | 9      | Describe any efforts to address potential sources of bias                                                                                                                            | 5                  |
| Study size                   | 10     | Explain how the study size was arrived at                                                                                                                                            | 4                  |
| Quantitative variables       | 11     | Explain how quantitative variables were handled in the analyses. If applicable, describe which groupings were chosen and why                                                         | 5                  |
| Statistical methods          | 12     | (a) Describe all statistical methods, including those used to control for confounding                                                                                                | 5                  |
|                              |        | (b) Describe any methods used to examine subgroups and interactions                                                                                                                  | 5                  |
|                              |        | (c) Explain how missing data were addressed                                                                                                                                          | 5                  |
|                              |        | (d) If applicable, describe analytical methods taking account of sampling strategy                                                                                                   |                    |
|                              |        | (e) Describe any sensitivity analyses                                                                                                                                                |                    |
| <b>Results</b>               |        |                                                                                                                                                                                      |                    |

|                          |     |                                                                                                                                                                                                                                                                                                                                                                                                               |                                |
|--------------------------|-----|---------------------------------------------------------------------------------------------------------------------------------------------------------------------------------------------------------------------------------------------------------------------------------------------------------------------------------------------------------------------------------------------------------------|--------------------------------|
| Participants             | 13* | (a) Report numbers of individuals at each stage of study—eg numbers potentially eligible, examined for eligibility, confirmed eligible, included in the study, completing follow-up, and analysed<br>(b) Give reasons for non-participation at each stage<br>(c) Consider use of a flow diagram                                                                                                               | 6                              |
| Descriptive data         | 14* | (a) Give characteristics of study participants (eg demographic, clinical, social) and information on exposures and potential confounders<br>(b) Indicate number of participants with missing data for each variable of interest                                                                                                                                                                               | 6,7,8,9,10,11                  |
| Outcome data             | 15* | Report numbers of outcome events or summary measures                                                                                                                                                                                                                                                                                                                                                          | 11,12                          |
| Main results             | 16  | (a) Give unadjusted estimates and, if applicable, confounder-adjusted estimates and their precision (eg, 95% confidence interval). Make clear which confounders were adjusted for and why they were included<br>(b) Report category boundaries when continuous variables were categorized<br>(c) If relevant, consider translating estimates of relative risk into absolute risk for a meaningful time period | In Supplementary tables.<br>11 |
| Other analyses           | 17  | Report other analyses done—eg analyses of subgroups and interactions, and sensitivity analyses                                                                                                                                                                                                                                                                                                                |                                |
| <b>Discussion</b>        |     |                                                                                                                                                                                                                                                                                                                                                                                                               |                                |
| Key results              | 18  | Summarise key results with reference to study objectives                                                                                                                                                                                                                                                                                                                                                      | 12,13                          |
| Limitations              | 19  | Discuss limitations of the study, taking into account sources of potential bias or imprecision. Discuss both direction and magnitude of any potential bias                                                                                                                                                                                                                                                    | 17                             |
| Interpretation           | 20  | Give a cautious overall interpretation of results considering objectives, limitations, multiplicity of analyses, results from similar studies, and other relevant evidence                                                                                                                                                                                                                                    | 17                             |
| Generalisability         | 21  | Discuss the generalisability (external validity) of the study results                                                                                                                                                                                                                                                                                                                                         | 17                             |
| <b>Other information</b> |     |                                                                                                                                                                                                                                                                                                                                                                                                               |                                |
| Funding                  | 22  | Give the source of funding and the role of the funders for the present study and, if applicable, for the original study on which the present article is based                                                                                                                                                                                                                                                 | 18                             |

\*Give information separately for cases and controls in case-control studies and, if applicable, for exposed and unexposed groups in cohort and cross-sectional studies.

**Note:** An Explanation and Elaboration article discusses each checklist item and gives methodological background and published examples of transparent reporting. The STROBE checklist is best used in conjunction with this article (freely available on the Web sites of PLoS Medicine at <http://www.plosmedicine.org/>, Annals of Internal Medicine at <http://www.annals.org/>, and Epidemiology at <http://www.epidem.com/>). Information on the STROBE Initiative is available at [www.strobe-statement.org](http://www.strobe-statement.org).

# BMJ Open

## **Percutaneous Coronary Intervention in Patients with Acute Coronary Syndrome in Chinese Military Hospitals, 2011-2014, a retrospective observational study of a national registry.**

|                                 |                                                                                                                                                                                                                                                                                                                                    |
|---------------------------------|------------------------------------------------------------------------------------------------------------------------------------------------------------------------------------------------------------------------------------------------------------------------------------------------------------------------------------|
| Journal:                        | <i>BMJ Open</i>                                                                                                                                                                                                                                                                                                                    |
| Manuscript ID                   | bmjopen-2018-023133.R1                                                                                                                                                                                                                                                                                                             |
| Article Type:                   | Research                                                                                                                                                                                                                                                                                                                           |
| Date Submitted by the Author:   | 09-Jul-2018                                                                                                                                                                                                                                                                                                                        |
| Complete List of Authors:       | Zhao, Ren; General Hospital of Shenyang Military Command<br>Xu, Kai; General Hospital of Shenyang Military Command<br>Li, Yi; General Hospital of Shenyang Military Command<br>Qiu, Miaohan; General Hospital of Shenyang Military Command<br>Han, Yaling; General Hospital of Shenyang Military Command, Department of Cardiology |
| <b>Primary Subject Heading</b>: | Cardiovascular medicine                                                                                                                                                                                                                                                                                                            |
| Secondary Subject Heading:      | Health services research                                                                                                                                                                                                                                                                                                           |
| Keywords:                       | Acute Coronary Syndrome, Percutaneous Coronary Intervention, Trending, Quality of care                                                                                                                                                                                                                                             |
|                                 |                                                                                                                                                                                                                                                                                                                                    |

SCHOLARONE™  
Manuscripts

Only

1  
2  
3  
4 **Percutaneous Coronary Intervention in Patients with Acute**  
5 **Coronary Syndrome in Chinese Military Hospitals, 2011-2014, a**  
6 **retrospective observational study of a national registry.**  
7  
8  
9

10 Ren Zhao,<sup>1</sup> Kai Xu,<sup>1</sup> Yi Li, Miaohan Qiu, Yaling Han, for the NRCIMH Program<sup>#</sup>.

11  
12  
13 <sup>1</sup>Ren Zhao and Kai Xu contributed equally to this study.

14  
15 Authors Affiliation: Cardiovascular Intervention Training Center of National Ministry of Health/of  
16 Chinese Medical Association, National Key Department of Cardiology, Institute of Cardiovascular  
17 Disease of PLA, Key Laboratory of Emergent and Severe Cardiovascular Disease Cures of PLA,  
18 General Hospital of Shenyang Military Region, Shenyang, China.  
19  
20  
21  
22  
23

24  
25 <sup>#</sup>The participating hospitals of the NRCIMH Program are listed in Table S1 in the Supplement.

26  
27  
28 \*Corresponding Author: Tel: +86 24 28856 123; fax: +86 24 28897 311. *E-mail address:*  
29  
30 han\_yaling@163.com (Y. Han). Department of Cardiology, General Hospital of Shenyang Military  
31 Region, No.83 Wenhua Road, Shenyang, 110016, China  
32  
33

34  
35 Running head: PCI performance in ACS  
36  
37  
38  
39  
40  
41  
42  
43  
44  
45  
46  
47  
48  
49  
50  
51  
52  
53  
54  
55  
56  
57  
58  
59  
60

**ABSTRACT**

**Objectives** Interventional treatment of patients with ACS (Acute Coronary Syndrome) is surging dramatically in China in recent years, whereas nationwide assessments of the quality of PCI (Percutaneous Coronary Intervention) procedural performance and outcomes are scarce. We aimed to provide an updated and real-world overview of the performance of PCI in ACS patients since 2011 in China after the China PEACE study from 2001 to 2011.

**Methods** In this cross-sectional study, data were extracted from the NRCIMH (National Registry of Cardiovascular Intervention in Military Hospitals) database to create a national sample of 144 659 ACS patients undergoing PCI at 117 military hospitals in all regions of China from calendar year 2011 to 2014. Patient characteristics, procedural performance, PCI outcomes and adverse events and temporal changes were analyzed.

**Results** During 2011 to 2014, ACS patients undergoing PCI increased dramatically. Small numbers of high-volume hospitals performed the majority of PCI procedures. However, only half of these patients were adequately covered and proportions for the use of assisted devices and novel medications were relatively small. Radial artery access was still increasing with time. Primary PCIs were performed on 45.4% STEMI patients with PCI procedures. 3.8% lesion vessels involve left main artery. Implanted stents, the overall complications and in-hospital mortality were decreasing remarkably.

**Conclusions** In Chinese military hospitals, interventional resources were limited with great regional disparities, there are still gaps to be filled to better serve ACS patients. Our findings can serve as an indispensable supplement to a more comprehensive understanding of the practice of contemporary cardiac intervention in China.

**Key Words:** Acute Coronary Syndrome; Percutaneous Coronary Intervention; Trending; Quality of

1  
2  
3  
4 care.

5  
6 **Strengths and limitations of this study**

- 7  
8 ▶ This is the first nationwide retrospective observational study of the performance of PCI in ACS  
9  
10 patients covering all geographic regions of mainland China.  
11  
12  
13 ▶ The assessment was based on real world registry data with sequential enrollment from calendar  
14  
15 year 2011 to 2014.  
16  
17  
18 ▶ PCI outcomes were based on in-hospital data and no follow-up were done to evaluate the long  
19  
20 term improvement of ACS patients undergoing PCI.  
21  
22  
23 ▶ Although all PCI-capable military hospitals participated in this program, patient outcomes might  
24  
25 be differentially affected by interventionist in hospitals with various volumes of PCI procedures  
26  
27 each year, thus may confound the overall results.  
28  
29

30 **INTRODUCTION**

31  
32  
33 Due to an aging population and increasing prevalence of cardiovascular risk factors, China is facing  
34  
35 an epidemic of acute coronary syndrome (ACS). In China, military hospitals play an indispensable role  
36  
37 in providing health care service largely to civilian patients in peacetime<sup>1-5</sup>, yet their performance of  
38  
39 care were underinvestigated. The drastic increase of acute coronary syndrome (ACS) in China has also  
40  
41 catalyzed the growth of percutaneous coronary intervention (PCI) in quantity.<sup>6</sup> However, whether the  
42  
43 rapid growth of PCI volume has translated into good quality of care for these ACS patients treated in  
44  
45 military hospitals remains unclear. The adoption of emerging technologies varies substantially across  
46  
47 different areas of China. The lack of a nationwide comprehensive assessment of interventional practice  
48  
49 hampered the improvement of health care provided to these patients. Understand these barriers within  
50  
51 the healthcare system of China is imperative to implement change.  
52  
53  
54  
55  
56

1  
2  
3  
4 The China PEACE (Patient-Centered Evaluative Assessment of Cardiac Event) study was a  
5  
6 nationally representative, retrospective study of patients undergoing coronary catheterization and PCI  
7  
8 at 55 urban Chinese non-military hospitals in calendar years 2001, 2006, and 2011.<sup>6</sup> This study found  
9  
10 that there were notable changes in practice, including use of radial PCI and medicated stents, yet  
11  
12 persistent gaps still existed to improve care.<sup>6</sup> Military hospitals are independently administered by the  
13  
14 Joint Logistic Support Center (the former General Logistics Department) of PLA (People's Liberation  
15  
16 Army) in China. To facilitate the management of cardiovascular intervention in military hospitals, the  
17  
18 Quality Control Center of Intervention for Cardiovascular Diseases was founded in 2009 by the Bureau  
19  
20 of Healthcare of the General Logistics Department.<sup>7</sup> Quality Improvement Initiatives were launched  
21  
22 thereafter to standardize the care of acute myocardial infarction nationwide in military hospitals,  
23  
24 including the establishment of Chest Pain Center in qualified cardiac centers.<sup>8</sup> To standardize and  
25  
26 monitor the quality of care for patients undergoing PCI procedures, we conducted the NRCIMH  
27  
28 (National Registry of Cardiovascular Intervention in Military Hospitals) study.<sup>9-11</sup> During calendar  
29  
30 years 2011 to 2014, 117 PCI-capable military hospitals in all seven geographical regions of China and  
31  
32 144 659 ACS patients undergoing PCI procedures were included in this study. Patient characteristics,  
33  
34 quality of procedural performance, PCI outcomes, and in-hospital adverse events and their temporal  
35  
36 changes were analyzed over time.  
37  
38  
39  
40  
41  
42  
43  
44

## 45 **Methods**

### 46 **Study Design**

47  
48 This study was a cross-sectional study using a registered dataset. The original data for this study was  
49  
50 extracted from the National Registry of Cardiovascular Intervention in Military Hospitals (NRCIMH,  
51  
52 web access via <http://www.xxgjr.com>). This database collected social-demographic, medical and  
53  
54  
55  
56  
57

1  
2  
3 interventional data of patients who had cardiovascular disease and underwent cardiac interventions  
4  
5 since October 2010 in all military hospitals nationwide that are qualified to perform cardiac  
6  
7 catheterization and PCI.<sup>9-11</sup> Patient demographics, clinical characteristics, and treatment patterns during  
8  
9 hospitalization were collected by physicians who were in charge of the patient, and coronary  
10  
11 catheterization or PCI related information were collected by the responsible operator or technical  
12  
13 assistant. Patient data were censored and uploaded into the database by designated medical personnel in  
14  
15 each individual hospital. The majority of patients had coronary artery disease and underwent PCI. This  
16  
17 study was approved by the ethics committee of the General Hospital of Shenyang Military Region. The  
18  
19 requirement of informed consent was waived due to the nature of the retrospective study. All  
20  
21 participating hospitals accepted the ethics committee approval.  
22  
23  
24  
25  
26

### 27 28 **Study Population**

29  
30 ACS Patients (with definite discharge diagnosis of either STEMI [ST-segment elevation myocardial  
31  
32 infarction], NSTEMI [non-ST-segment elevation myocardial infarction], or unstable angina)  
33  
34 undergoing interventional procedures in all 117 military hospitals (Table S1) from January 1, 2011 to  
35  
36 December 31, 2014 were included in this study. Diagnoses were made according to the China National  
37  
38 Guidelines for ACS,<sup>12,13</sup> which are consistent with guidelines in the US.<sup>14,15</sup> Due to the large-volume  
39  
40 information inputted into this Registry, patients with missing data were excluded in specific categorical  
41  
42 analyses, including age, gender, region of hospital, access artery, contrast type, lesion vessel, target  
43  
44 vessel. For measured categories like artery stenosis and lesion category, their sum exceed the total  
45  
46 number of patients enrolled in each study year is because each patient usually had more than one  
47  
48 stenosed/lesioned vessel. For the sake of clarity, the sum for each measured variable category was  
49  
50 listed in the column of each category unless otherwise specified. Data integrity for each measure  
51  
52  
53  
54  
55  
56



category was not less than 91.8% in this study.

### **Variables and Definitions**

We collected data from a unified registry form abstracted from the original Database systems, including baseline characteristics (diagnosis, patient category, age, gender, ethnicity, region of admission hospital, medical history), perioperative characteristics (primary PCI composition, access artery, contrast type, antiplatelet and anticoagulation medications, assisted devices), PCI outcomes (stenosis pre-PCI, lesion category, lesion vessel, target vessel), and adverse outcomes including complication and death both during PCI and post-PCI. Medical histories including histories of myocardial infarction, cerebrovascular disease, peripheral vascular disease, cardiac valve surgery, CABG, and PCI were collected by physicians in charge of that patient (mainly via patient's own statement and further verified, if any, by documentation in previous admission notes, discharge diagnoses, or corroborating laboratory test results) and were uploaded into the registry database. For the convenience of calculation, anomalous artery, intermediate artery and vessel graft lesion as well as interventions done in these vessels were all merged into the individual categories. In addition, due to a systematic revision of the registry form since 2013, partial data were analyzed and summarized in the supplement, including location and Killip classification of MI history, assisted device used during 2011-2013, information regarding medical coverage, thrombolysis of STEMI patient, PCI outcomes, and stent manufacturer during 2013-2014.

Patients with corrected TIMI frame count (cTFC) values exceeding the thresholds by greater than 2 SD (standard deviations) for the particular vessel were recognized as having coronary slow flow.<sup>16</sup> Major bleeding was defined as any intracranial bleeding, absolute hemoglobin decrease of at least 50 g/L, bleeding resulting in hypovolemic shock, or fatal bleeding (bleeding that resulted directly in death

1  
2  
3 within 7 days). Acute/subacute stent thrombosis was defined according to the Academic Research  
4  
5 Consortium criteria.<sup>17</sup> Postoperative myocardial infarction was diagnosed in accordance with the  
6  
7 universal definition of type 4 myocardial infarction.<sup>18</sup> The cause of death was adjudicated as  
8  
9 cardiogenic death, PCI-related death, or uncertain.  
10  
11

### 12 13 **Statistical Analysis**

14  
15 We used percentages to describe categorical variables and median with interquartile ranges (IQRs) to  
16  
17 describe continuous variables unless otherwise specified.  $\chi^2$  trend tests were used to examine trends  
18  
19 across different study years for categorical variables. For the comparison of data between 2013 and  
20  
21 2014,  $\chi^2$  tests were used for categorical variables and Mann Whitney tests for continuous variables with  
22  
23 non-normal distribution. We constructed three indicator variables representing years 2012, 2013, and  
24  
25 2014, leaving 2011 as the reference. We did logistic regressions including these indicators for time as  
26  
27 key explanatory variables, while adjusting for patients' ACS types (unstable angina, NSTEMI, STEMI),  
28  
29 demographics (age and sex), comorbidities (hypertension, hyperlipidemia, diabetes mellitus, COPD,  
30  
31 current smoking, heart failure, renal failure, under dialysis, prior cerebrovascular disease, prior  
32  
33 peripheral vascular disease, prior PCI, prior cardiac valve surgery, prior CABG). The dependent variable  
34  
35 was in-hospital death. We also tested the linear trend over time in the models. We report odds ratios  
36  
37 (ORs) and 95% CIs from the multilevel logistic regression related to the year indicators. All  
38  
39 comparisons were 2-sided, with statistical significance defined as  $P < 0.05$ . Statistical analyses were  
40  
41 performed using GraphPad Prism, version 6.01 and SAS software, version 9.3.  
42  
43  
44  
45  
46  
47  
48  
49

50 *Patient and Public Involvement* Patients and public were not involved in this study.

### 51 52 **Results**

53  
54 A total of 144 659 ACS patients undergoing PCI in 117 military hospitals were recruited into this  
55  
56

study from 2011 to 2014, located in all 7 geographic regions of mainland China, including North China (n = 25), Northwest (n = 14), Northeast (n = 10), East China (n = 29), Southwest (n = 14), Central China (n = 12), and South China (n = 13). Of these, 82 hospitals provided 140 374 cases (97.0%) across all the study years (Table S1). In brief, only 20 (17.1%) hospitals performed more than 400 PCIs on ACS patients annually (Figure 1A), and these hospitals performed 71.9% PCIs (104 026 cases) during 2011-2014 (Figure 1B). Geographically, although the total number of hospitals in Northern China (North China, Northwest, Northeast regions) was less than that in Southern China (South China, East China, Central China, and Southwest regions), there were more military hospitals in Northern China performed PCI procedures > 400 cases per year than those in Southern China (Figure 1C), and northern military hospitals performed the majority of PCIs during the study years (66.5%) (Figure 1D).

Generally, the number of ACS patient undergoing PCI has increased by 27.8%, while the proportions of most comorbidities of these patients had concordant decrease over time. Hospitals in northern China (North China, Northwest, and Northeast) performed the majority of PCIs, with most patients being civilian and with Han ethnicity. There were significant increases in the proportions of patients diagnosed as UAP, of civilian identity, male gender, treated in hospitals in Northeast, East and South China, and significant decreases in the proportions of patients diagnosed as STEMI, treated in hospitals in North China, Northwest and Central China (Table 1). During 2013-2014, only half of these patients were covered by urban resident medical service (53.4% to 53.6%) (Table S2).

**Table 1. Baseline characteristics of ACS patients undergoing PCI during 2011-2014**

|            | 2011  |      | 2012  |      | 2013  |      | 2014  |      | P value for trend |
|------------|-------|------|-------|------|-------|------|-------|------|-------------------|
|            | n     | %    | n     | %    | n     | %    | n     | %    |                   |
| ACS        | 30800 |      | 34974 |      | 39524 |      | 39361 |      |                   |
| UAP        | 22038 | 71.6 | 24847 | 71.0 | 28727 | 72.7 | 28508 | 72.4 | < .0001           |
| STEMI      | 6514  | 21.1 | 7302  | 20.9 | 7889  | 20.0 | 7856  | 20.0 | < .0001           |
| NSTEMI     | 2248  | 7.3  | 2825  | 8.1  | 2908  | 7.4  | 2997  | 7.6  | .87               |
| Age, years | 30651 |      | 34872 |      | 39466 |      | 39351 |      |                   |

|    |                    |       |      |       |      |       |      |       |      |        |
|----|--------------------|-------|------|-------|------|-------|------|-------|------|--------|
| 1  |                    |       |      |       |      |       |      |       |      |        |
| 2  |                    |       |      |       |      |       |      |       |      |        |
| 3  | 18-24              | 12    | 0.0  | 8     | 0.0  | 16    | 0.0  | 15    | 0.0  | .70    |
| 4  | 25-34              | 177   | 0.6  | 223   | 0.6  | 246   | 0.6  | 243   | 0.6  | .62    |
| 5  | 35-44              | 1597  | 5.2  | 1930  | 5.5  | 2149  | 5.4  | 2187  | 5.6  | .09    |
| 6  | 45-54              | 5849  | 19.1 | 6663  | 19.1 | 7283  | 18.5 | 7507  | 19.1 | .52    |
| 7  | 55-64              | 10291 | 33.6 | 11990 | 34.4 | 13888 | 35.2 | 13381 | 34.0 | .11    |
| 8  | 65-74              | 8615  | 28.1 | 9510  | 27.3 | 10650 | 27.0 | 10832 | 27.5 | .09    |
| 9  | 75-84              | 3850  | 12.6 | 4227  | 12.1 | 4884  | 12.4 | 4800  | 12.2 | .33    |
| 10 | >84                | 260   | 0.8  | 321   | 0.9  | 350   | 0.9  | 386   | 1.0  | .11    |
| 11 |                    |       |      |       |      |       |      |       |      |        |
| 12 |                    |       |      |       |      |       |      |       |      |        |
| 13 | Gender             | 30155 |      | 34191 |      | 39189 |      | 39336 |      |        |
| 14 | Male               | 22017 | 73.0 | 25423 | 74.4 | 29104 | 74.3 | 29193 | 74.2 | <.01   |
| 15 | Female             | 8138  | 27.0 | 8768  | 25.6 | 10085 | 25.7 | 10143 | 25.8 |        |
| 16 | Ethnicity          | 30800 |      | 34974 |      | 39524 |      | 39361 |      |        |
| 17 | Han                | 30589 | 99.3 | 34691 | 99.2 | 38974 | 98.6 | 38620 | 98.1 | <.0001 |
| 18 | Others             | 211   | 0.7  | 283   | 0.8  | 550   | 1.4  | 741   | 1.9  |        |
| 19 |                    |       |      |       |      |       |      |       |      |        |
| 20 | Region of hospital | 30783 |      | 34970 |      | 39524 |      | 39361 |      |        |
| 21 | North China        | 9156  | 29.7 | 9631  | 27.5 | 9914  | 25.1 | 11086 | 28.2 | <.0001 |
| 22 | Northwest          | 7632  | 24.8 | 7939  | 22.7 | 9728  | 24.6 | 7821  | 19.9 | <.0001 |
| 23 | Northeast          | 3924  | 12.7 | 5347  | 15.3 | 6691  | 16.9 | 7284  | 18.5 | <.0001 |
| 24 | East China         | 3742  | 12.2 | 4630  | 13.2 | 5053  | 12.8 | 5241  | 13.3 | <.001  |
| 25 | Southwest          | 3515  | 11.4 | 4346  | 12.4 | 4877  | 12.3 | 4549  | 11.6 | .96    |
| 26 | Central China      | 1977  | 6.4  | 1928  | 5.5  | 1910  | 4.8  | 1944  | 4.9  | <.0001 |
| 27 | South China        | 837   | 2.7  | 1149  | 3.3  | 1351  | 3.4  | 1436  | 3.6  | <.0001 |
| 28 |                    |       |      |       |      |       |      |       |      |        |
| 29 |                    |       |      |       |      |       |      |       |      |        |
| 30 | Comorbidities      | 30800 |      | 34974 |      | 39524 |      | 39361 |      |        |
| 31 | Hypertension       | 17600 | 57.1 | 19942 | 57.0 | 21260 | 53.8 | 21701 | 55.1 | <.0001 |
| 32 | Hyperlipidemia     | 6844  | 22.2 | 7774  | 22.2 | 7420  | 18.8 | 7330  | 18.6 | <.0001 |
| 33 | Diabetes Mellitus  | 6829  | 22.2 | 7817  | 22.4 | 8394  | 21.2 | 8819  | 22.4 | .75    |
| 34 | COPD               | 541   | 1.8  | 448   | 1.3  | 478   | 1.2  | 447   | 1.1  | <.0001 |
| 35 | Current smoking    | 9093  | 29.5 | 10838 | 31.0 | 11467 | 29.0 | 10568 | 26.8 | <.0001 |
| 36 | Heart failure*     | 1378  | 4.5  | 1373  | 3.9  | 1331  | 3.4  | 1122  | 2.9  | <.0001 |
| 37 | Renal failure*     | 277   | 0.9  | 297   | 0.8  | 259   | 0.7  | 276   | 0.7  | <.001  |
| 38 | Under dialysis*    | 34    | 0.1  | 52    | 0.1  | 45    | 0.1  | 45    | 0.1  | .71    |
| 39 |                    |       |      |       |      |       |      |       |      |        |
| 40 | Prior MI           | 7560  | 24.5 | 7828  | 22.4 | 7928  | 20.1 | 5648  | 14.3 | <.0001 |
| 41 | Prior CVD          | 2014  | 6.5  | 1912  | 5.5  | 1990  | 5.0  | 2018  | 5.1  | <.0001 |
| 42 | Prior PVD          | 457   | 1.5  | 430   | 1.2  | 489   | 1.2  | 515   | 1.3  | .09    |
| 43 | Prior PCI          | 5702  | 18.5 | 6125  | 17.5 | 6467  | 16.4 | 5973  | 15.2 | <.0001 |
| 44 | Prior CVS          | 1077  | 3.5  | 1192  | 3.4  | 563   | 1.4  | 14    | 0.0  | <.0001 |
| 45 | Prior CABG         | 936   | 3.0  | 952   | 2.7  | 580   | 1.5  | 204   | 0.5  | <.0001 |
| 46 | Familial CAD       | 805   | 2.6  | 867   | 2.5  | 681   | 1.7  | 615   | 1.6  | <.0001 |
| 47 |                    |       |      |       |      |       |      |       |      |        |
| 48 |                    |       |      |       |      |       |      |       |      |        |
| 49 |                    |       |      |       |      |       |      |       |      |        |

ACS, acute coronary syndrome; CABG, coronary artery bypass graft; CAD, coronary artery disease; COPD, chronic obstructive pulmonary disease; CVD, cerebrovascular disease; CVS, cardiac valve surgery; MI, myocardial infarction; NSTEMI, non-ST elevation myocardial infarction; PCI, percutaneous coronary intervention; PVD, peripheral vascular disease; STEMI, ST elevation myocardial infarction; UAP, unstable angina pectoris; \* assessed and recorded at admission.

The proportion of primary PCI dropped significantly in ACS patients in all categories. In STEMI

patients, the fraction of primary PCI in all PCI performed did not change dramatically (44.0% to 47.9%, Table 2). There is remarkable increase in the proportion of anterior myocardial infarction and significant decrease in the proportion of cardiac function defined as Killip III/IV (Table S3). There was more time delay on first medical contact to balloon dilation in 2014 than in 2013 (median 50 vs 40,  $P < .01$ ) (Table S4). PCI procedures done through the radial artery had increased markedly from 72% in 2011 to 90.4% in 2014. The use of clopidogrel and GP IIb/IIIa inhibitor dropped significantly. Proportions of novel drugs like ticagrelor and bivalirudin, and of assisted devices such as intra-aortic balloon pump (IABP), intravascular ultrasound (IVUS), optical coherence tomography (OCT), and fractional flow reserve (FFR) measurement, were low in all time periods (Table 2, Table S5). In addition, from 2013-2014, thrombolysis in STEMI patients was not altered in terms of performance rate, thrombolytics, and time delay from angina to thrombolysis increased remarkably and the success rate dropped significantly as well (Table S6).

**Table 2. Perioperative characteristics of ACS patients undergoing PCI during 2011-2014**

|               | 2011      |      | 2012      |      | 2013      |      | 2014      |      | P value<br>for trend |
|---------------|-----------|------|-----------|------|-----------|------|-----------|------|----------------------|
|               | n         | %    | n         | %    | n         | %    | n         | %    |                      |
| pPCI          | 30800     |      | 34974     |      | 39524     |      | 39361     |      |                      |
| Yes           | 3689      | 12.0 | 4359      | 12.5 | 4263      | 10.8 | 4211      | 10.7 | <.0001               |
| On STEMI      | 2866      | 9.3  | 3499      | 10.0 | 3505      | 8.9  | 3544      | 9.0  | <.01                 |
| pPCI/PCI      | 2866/6514 | 44.0 | 3499/7302 | 47.9 | 3505/7889 | 44.4 | 3544/7856 | 45.1 | .78                  |
| On NSTEMI     | 334       | 1.1  | 372       | 1.1  | 349       | 0.9  | 365       | 0.9  | <.01                 |
| On UAP        | 489       | 1.6  | 488       | 1.4  | 409       | 1.0  | 302       | 0.8  | <.0001               |
| No            | 27111     | 88.0 | 30615     | 87.5 | 35261     | 89.2 | 35150     | 89.3 |                      |
| Access artery | 30800     |      | 34800     |      | 39524     |      | 39361     |      |                      |
| Radial        | 22171     | 72.0 | 28266     | 81.2 | 34520     | 87.3 | 35582     | 90.4 | <.0001               |
| Femoral       | 8453      | 27.4 | 6527      | 18.7 | 4803      | 12.2 | 3545      | 9.0  | <.0001               |
| Brachial      | 165       | 0.5  | 170       | 0.5  | 187       | 0.5  | 209       | 0.5  | .94                  |
| Others        | 11        | 0.0  | 11        | 0.0  | 14        | 0.0  | 25        | 0.1  | .06                  |
| Contrast type | 30080     |      | 34154     |      | 38585     |      | 39361     |      |                      |
| Nonionic      | 30027     | 99.8 | 34119     | 99.9 | 38493     | 99.8 | 39198     | 99.6 | <.0001               |
| Iso-osmolar   | 10055     | 33.4 | 12988     | 38.0 | 16540     | 42.9 | 20034     | 50.9 | <.0001               |
| Low-osmolar   | 19972     | 66.4 | 21131     | 61.9 | 21953     | 56.9 | 19164     | 48.7 | <.0001               |
| Ionic         | 53        | 0.2  | 35        | 0.1  | 92        | 0.2  | 163       | 0.4  | <.0001               |

|                       |       |      |       |      |       |      |       |      |        |    |    |    |    |    |    |    |    |    |    |    |    |    |    |
|-----------------------|-------|------|-------|------|-------|------|-------|------|--------|----|----|----|----|----|----|----|----|----|----|----|----|----|----|
| 1                     | 2     | 3    | 4     | 5    | 6     | 7    | 8     | 9    | 10     | 11 | 12 | 13 | 14 | 15 | 16 | 17 | 18 | 19 | 20 | 21 | 22 | 23 | 24 |
| Antiplatelet          | 30800 |      | 34974 |      | 39524 |      | 39361 |      |        |    |    |    |    |    |    |    |    |    |    |    |    |    |    |
| Aspirin               | 29459 | 95.6 | 34189 | 97.8 | 38267 | 96.8 | 38547 | 97.9 | <.0001 |    |    |    |    |    |    |    |    |    |    |    |    |    |    |
| Clopidogrel           | 29486 | 95.7 | 34231 | 97.9 | 37165 | 94.0 | 36122 | 91.8 | <.0001 |    |    |    |    |    |    |    |    |    |    |    |    |    |    |
| Ticagrelor            | 30    | 0.1  | 13    | 0.0  | 222   | 0.6  | 1299  | 3.3  | <.0001 |    |    |    |    |    |    |    |    |    |    |    |    |    |    |
| Ticlopidine           | 54    | 0.2  | 50    | 0.1  | 520   | 1.3  | 1202  | 3.1  | <.0001 |    |    |    |    |    |    |    |    |    |    |    |    |    |    |
| Cilostazol            | 22    | 0.1  | 17    | 0.0  | 23    | 0.1  | 15    | 0.0  | .11    |    |    |    |    |    |    |    |    |    |    |    |    |    |    |
| GP IIb/IIIa inhibitor | 4670  | 15.2 | 6232  | 17.8 | 6135  | 15.5 | 5099  | 13.0 | <.0001 |    |    |    |    |    |    |    |    |    |    |    |    |    |    |
| Anticoagulation       | 30800 |      | 34974 |      | 39524 |      | 39361 |      |        |    |    |    |    |    |    |    |    |    |    |    |    |    |    |
| UFH                   | 18788 | 61.0 | 21343 | 61.0 | 22885 | 57.9 | 24547 | 62.4 | .19    |    |    |    |    |    |    |    |    |    |    |    |    |    |    |
| LMWH                  | 9248  | 30.0 | 10398 | 29.7 | 12622 | 31.9 | 12012 | 30.5 | <.01   |    |    |    |    |    |    |    |    |    |    |    |    |    |    |
| Fondaparinux          | 373   | 1.2  | 939   | 2.7  | 886   | 2.2  | 0     | 0.0  | <.0001 |    |    |    |    |    |    |    |    |    |    |    |    |    |    |
| Bivalirudin           | 0     | 0.0  | 0     | 0.0  | 93    | 0.2  | 395   | 1.0  | <.0001 |    |    |    |    |    |    |    |    |    |    |    |    |    |    |
| IABP                  | 30800 |      | 34974 |      | 39524 |      | 39361 |      |        |    |    |    |    |    |    |    |    |    |    |    |    |    |    |
| Yes                   | 450   | 1.5  | 579   | 1.7  | 584   | 1.5  | 432   | 1.1  | <.0001 |    |    |    |    |    |    |    |    |    |    |    |    |    |    |
| No                    | 30350 | 98.5 | 34395 | 98.3 | 38940 | 98.5 | 38929 | 98.9 |        |    |    |    |    |    |    |    |    |    |    |    |    |    |    |
| IVUS                  | 30800 |      | 34974 |      | 39524 |      | 39361 |      |        |    |    |    |    |    |    |    |    |    |    |    |    |    |    |
| Yes                   | 439   | 1.4  | 399   | 1.1  | 383   | 1.0  | 439   | 1.1  | <.0001 |    |    |    |    |    |    |    |    |    |    |    |    |    |    |
| No                    | 30361 | 98.6 | 34575 | 98.9 | 39141 | 99.0 | 38922 | 98.9 |        |    |    |    |    |    |    |    |    |    |    |    |    |    |    |

ACS, acute coronary syndrome; GP IIb/IIIa, glycoprotein IIb/IIIa; IABP, intra-aortic balloon pump; IVUS, intravascular ultrasound; LMWH, low molecular weight heparin; NSTEMI, non-ST elevation myocardial infarction; PCI, percutaneous coronary intervention; pPCI, primary percutaneous coronary intervention; STEMI, ST elevation myocardial infarction; UAP, unstable angina pectoris; UFH, unfractionated heparin.

Under catheterization, artery stenosis > 75% increased significantly in proportions during the study years. Long lesion constitutes approximately one third of the overall lesions, there were increased trends in the proportion of general lesion, total occluded lesion, and thrombus lesion, and decreased trends in long lesion, calcified lesion and bifurcation lesion. The proportion of triple-vessel lesion significantly decreased, while that of solitary vessel lesion increased dramatically. Under PCI, target vessels were primarily solitary with increased trends in proportions of all arteries, followed by double vessels with decreased proportions. Target vessels involving LM consist 3.4% to 4.2% of all PCI procedures. PCI procedures targeting triple vessels had also decreased both in amount and in proportion (Table 3). From 2013 to 2014, the mean implanted stent per patient decreased from 1.5 to 1.4 ( $P < .01$ ) (Table S7), the majorities implanted stents were made by domestic companies with a decreased proportion over time (Table S8).

**Table 3. PCI characteristics of ACS patient during 2011-2014**

|                            | 2011  |      | 2012  |      | 2013  |      | 2014  |      | <i>P</i> value<br>for trend |
|----------------------------|-------|------|-------|------|-------|------|-------|------|-----------------------------|
|                            | n     | %    | n     | %    | n     | %    | n     | %    |                             |
| Artery stenosis            | 39090 |      | 42260 |      | 46915 |      | 46938 |      |                             |
| 75-99%                     | 27879 | 71.3 | 31048 | 73.5 | 34976 | 74.6 | 35971 | 76.6 | < .0001                     |
| 100%                       | 7228  | 18.5 | 8642  | 20.4 | 9704  | 20.7 | 9385  | 20.0 | < .0001                     |
| 50-75%                     | 3557  | 9.1  | 2326  | 5.5  | 2003  | 4.3  | 1540  | 3.3  | < .0001                     |
| < 50%                      | 426   | 1.1  | 244   | 0.6  | 232   | 0.5  | 42    | 0.1  | < .0001                     |
| Lesion category            | 38606 |      | 41713 |      | 46292 |      | 46073 |      |                             |
| Long lesion <sup>#</sup>   | 13571 | 35.2 | 14939 | 35.8 | 16375 | 35.4 | 15736 | 34.2 | < .001                      |
| General lesion             | 12686 | 32.9 | 13036 | 31.3 | 14874 | 32.1 | 15878 | 34.5 | < .0001                     |
| Total occluded lesion      | 4597  | 11.9 | 5532  | 13.3 | 6058  | 13.1 | 5930  | 12.9 | < .001                      |
| Calcified lesion           | 3184  | 8.2  | 3006  | 7.2  | 3473  | 7.5  | 2781  | 6.0  | < .0001                     |
| Bifurcation lesion         | 2545  | 6.6  | 2463  | 5.9  | 2479  | 5.4  | 2891  | 6.3  | < .01                       |
| Thrombus lesion            | 1782  | 4.6  | 2469  | 5.9  | 2711  | 5.9  | 2549  | 5.5  | < .0001                     |
| Small vessel <sup>##</sup> | 217   | 0.6  | 246   | 0.6  | 277   | 0.6  | 272   | 0.6  | .59                         |
| Bypass graft lesion        | 24    | 0.1  | 22    | 0.1  | 45    | 0.1  | 36    | 0.1  | .12                         |
| Lesion vessel <sup>*</sup> | 30457 |      | 34800 |      | 39427 |      | 39295 |      |                             |
| Triple                     | 12298 | 40.4 | 12803 | 36.8 | 13253 | 33.6 | 12301 | 31.3 | < .0001                     |
| Solitary                   | 8580  | 28.2 | 11567 | 33.2 | 14395 | 36.5 | 14912 | 37.9 | < .0001                     |
| LAD                        | 5397  | 17.7 | 7090  | 20.4 | 8544  | 21.7 | 8599  | 21.9 | < .0001                     |
| RCA                        | 2147  | 7.0  | 3111  | 8.9  | 3866  | 9.8  | 4222  | 10.7 | < .0001                     |
| LCX                        | 1036  | 3.4  | 1366  | 3.9  | 1985  | 5.0  | 2038  | 5.2  | < .0001                     |
| Double                     | 7308  | 24.0 | 8104  | 23.3 | 9180  | 23.3 | 9374  | 23.9 | .84                         |
| LAD + RCA                  | 3694  | 12.1 | 3936  | 11.3 | 4270  | 10.8 | 4285  | 10.9 | < .0001                     |
| LAD + LCX                  | 2558  | 8.4  | 2968  | 8.5  | 3475  | 8.8  | 3554  | 9.0  | < .001                      |
| LCX + RCA                  | 1056  | 3.5  | 1200  | 3.4  | 1435  | 3.6  | 1535  | 3.9  | < .001                      |
| Triple + LM                | 1540  | 5.1  | 1481  | 4.3  | 1638  | 4.2  | 1644  | 4.2  | < .0001                     |
| Double + LM                | 489   | 1.6  | 502   | 1.4  | 574   | 1.5  | 593   | 1.5  | .41                         |
| LAD + LCX + LM             | 230   | 0.8  | 247   | 0.7  | 339   | 0.9  | 315   | 0.8  | .16                         |
| LAD + RCA + LM             | 195   | 0.6  | 212   | 0.6  | 198   | 0.5  | 215   | 0.5  | < .05                       |
| LCX + RCA + LM             | 64    | 0.2  | 43    | 0.1  | 37    | 0.1  | 63    | 0.2  | .09                         |
| Solitary + LM              | 178   | 0.6  | 253   | 0.7  | 300   | 0.8  | 367   | 0.9  | < .0001                     |
| LAD + LM                   | 139   | 0.5  | 197   | 0.6  | 220   | 0.6  | 281   | 0.7  | < .0001                     |
| RCA + LM                   | 26    | 0.1  | 37    | 0.1  | 51    | 0.1  | 49    | 0.1  | .09                         |
| LCX + LM                   | 13    | 0.0  | 19    | 0.1  | 29    | 0.1  | 37    | 0.1  | < .01                       |
| LM                         | 64    | 0.2  | 90    | 0.3  | 107   | 0.3  | 128   | 0.3  | < .01                       |
| Target vessel <sup>*</sup> | 28278 |      | 32836 |      | 38176 |      | 39224 |      |                             |
| Solitary                   | 20801 | 73.6 | 25513 | 77.7 | 30592 | 80.1 | 31456 | 80.2 | < .0001                     |
| LAD                        | 10735 | 38.0 | 13277 | 40.4 | 15749 | 41.3 | 15960 | 40.7 | < .0001                     |
| LCX                        | 3017  | 10.7 | 3563  | 10.9 | 4665  | 12.2 | 4867  | 12.4 | < .0001                     |
| RCA                        | 7049  | 24.9 | 8673  | 26.4 | 10178 | 26.7 | 10629 | 27.1 | < .0001                     |
| Double                     | 5713  | 20.2 | 5685  | 17.3 | 5906  | 15.5 | 5886  | 15.0 | < .0001                     |
| LAD + LCX                  | 2723  | 9.6  | 2683  | 8.2  | 2865  | 7.5  | 2815  | 7.2  | < .0001                     |

|                |      |     |      |     |      |     |      |     |        |
|----------------|------|-----|------|-----|------|-----|------|-----|--------|
| LAD + RCA      | 1978 | 7.0 | 1937 | 5.9 | 1904 | 5.0 | 1932 | 4.9 | <.0001 |
| LCX + RCA      | 1012 | 3.6 | 1065 | 3.2 | 1137 | 3.0 | 1139 | 2.9 | <.0001 |
| Solitary + LM  | 566  | 2.0 | 603  | 1.8 | 690  | 1.8 | 923  | 2.4 | <.001  |
| LAD + LM       | 482  | 1.7 | 531  | 1.6 | 600  | 1.6 | 782  | 2.0 | <.01   |
| LCX + LM       | 68   | 0.2 | 58   | 0.2 | 71   | 0.2 | 123  | 0.3 | <.05   |
| RCA + LM       | 16   | 0.1 | 14   | 0.0 | 19   | 0.0 | 18   | 0.0 | .68    |
| Double + LM    | 483  | 1.7 | 455  | 1.4 | 462  | 1.2 | 464  | 1.2 | <.0001 |
| LAD + LCX + LM | 405  | 1.4 | 375  | 1.1 | 387  | 1.0 | 382  | 1.0 | <.0001 |
| LAD + RCA + LM | 73   | 0.3 | 69   | 0.2 | 69   | 0.2 | 72   | 0.2 | <.05   |
| LCX + RCA + LM | 5    | 0.0 | 11   | 0.0 | 6    | 0.0 | 10   | 0.0 | .92    |
| Triple         | 568  | 2.0 | 433  | 1.3 | 354  | 0.9 | 298  | 0.8 | <.0001 |
| LM             | 97   | 0.3 | 113  | 0.3 | 153  | 0.4 | 173  | 0.4 | <.05   |
| Triple + LM    | 50   | 0.2 | 34   | 0.1 | 19   | 0.0 | 24   | 0.1 | <.0001 |

ACS, acute coronary syndrome; LAD, left anterior descending artery; LCX, left circumflex artery; LM, left main artery; PCI, percutaneous coronary intervention; RCA, right coronary artery; # denotes length of lesion > 20mm; ## denotes vessel diameter < 2.5mm; \* include anomalous artery, intermediate artery, and vessel graft.

In general, more complications were recorded during PCI than post-PCI, and the overall complications were significantly decreased both in amount and in proportion, either during PCI or post-PCI. During PCI procedures, slow flow, serious dissection, acute thrombosis, perforation, and cardiac tamponade had markedly decreased. As for complications after PCI, acute/subacute stent thrombosis, organ failure, major bleeding/hematoma, contrast reaction, and thromboembolism had decreased trends in proportion during the study years. There were also significantly decreased trends of death both in amount and in proportion, during/after PCI, with the majority of death found after PCI procedures due to cardiogenic triggers (Table 4). After adjustment for patient demographic and clinical characteristics in the multilevel logistic regression, the risk of in-hospital mortality also significantly decreased over time (Figure 2).

**Table 4. In-hospital adverse events of ACS patient undergoing PCI during 2011-2014**

| Complication       | 2011        |      | 2012        |      | 2013        |      | 2014        |     | P value for trend |
|--------------------|-------------|------|-------------|------|-------------|------|-------------|-----|-------------------|
|                    | (n = 30800) |      | (n = 34974) |      | (n = 39524) |      | (n = 39361) |     |                   |
|                    | n           | %    | n           | %    | n           | %    | n           | %   |                   |
| Complication       | 496         | 16.1 | 539         | 15.4 | 429         | 10.9 | 256         | 6.5 | <.0001            |
| During procedure*  | 342         | 11.1 | 334         | 9.5  | 269         | 6.8  | 151         | 3.8 | <.0001            |
| Slow flow          | 201         | 6.5  | 168         | 4.8  | 159         | 4.0  | 87          | 2.2 | <.0001            |
| Serious dissection | 71          | 2.3  | 75          | 2.1  | 64          | 1.6  | 32          | 0.8 | <.0001            |



|                         |     |     |     |     |     |     |     |     |         |
|-------------------------|-----|-----|-----|-----|-----|-----|-----|-----|---------|
| Acute thrombosis        | 54  | 1.8 | 48  | 1.4 | 36  | 0.9 | 23  | 0.6 | < .0001 |
| Perforation             | 22  | 0.7 | 32  | 0.9 | 17  | 0.4 | 17  | 0.4 | < .05   |
| Cardiac tamponade       | 11  | 0.4 | 17  | 0.5 | 9   | 0.2 | 7   | 0.2 | < .05   |
| Acute occlusion         | 11  | 0.4 | 24  | 0.7 | 19  | 0.5 | 12  | 0.3 | .38     |
| Post-procedure          | 154 | 5.0 | 205 | 5.9 | 160 | 4.0 | 105 | 2.7 | < .0001 |
| Acute/subacute ST       | 46  | 1.5 | 49  | 1.4 | 37  | 0.9 | 30  | 0.8 | < .001  |
| Organ failure           | 37  | 1.2 | 31  | 0.9 | 29  | 0.7 | 19  | 0.5 | < .001  |
| Organ support           | 8   | 0.3 | 2   | 0.0 | 7   | 0.2 | 3   | 0.0 | .15     |
| Major bleeding/hematoma | 19  | 0.6 | 19  | 0.5 | 23  | 0.6 | 6   | 0.2 | < .01   |
| Organ bleeding          | 14  | 0.5 | 21  | 0.6 | 11  | 0.3 | 11  | 0.3 | .06     |
| Postoperative MI        | 10  | 0.3 | 20  | 0.6 | 14  | 0.4 | 7   | 0.2 | .10     |
| Contrast reaction       | 7   | 0.2 | 10  | 0.3 | 3   | 0.0 | 2   | 0.0 | < .01   |
| Postoperative infection | 5   | 0.2 | 6   | 0.2 | 8   | 0.2 | 3   | 0.0 | .40     |
| Thromboembolism         | 4   | 0.1 | 11  | 0.3 | 2   | 0.0 | 2   | 0.0 | < .05   |
| Emergent surgery        | 4   | 0.1 | 2   | 0.0 | 1   | 0.0 | 2   | 0.0 | .18     |
| Others                  | 28  | 0.9 | 56  | 1.6 | 43  | 1.1 | 26  | 0.7 | .06     |
| Death                   | 166 | 5.4 | 179 | 5.1 | 150 | 3.8 | 113 | 2.9 | < .0001 |
| During PCI              | 41  | 1.3 | 30  | 0.9 | 22  | 0.6 | 16  | 0.4 | < .0001 |
| Cardiogenic             |     |     |     |     |     |     |     |     |         |
| Yes                     | 34  | 1.1 | 25  | 0.7 | 16  | 0.4 | 16  | 0.4 | < .0001 |
| No                      | 1   | 0.0 | 1   | 0.0 | 2   | 0.0 | 0   | 0.0 | .52     |
| Uncertain               | 6   | 0.2 | 4   | 0.1 | 4   | 0.1 | 0   | 0.0 | < .05   |
| PCI related             |     |     |     |     |     |     |     |     |         |
| Yes                     | 4   | 0.1 | 1   | 0.0 | 1   | 0.0 | 4   | 0.1 | .76     |
| No                      | 23  | 0.7 | 15  | 0.4 | 11  | 0.3 | 11  | 0.3 | < .01   |
| Uncertain               | 14  | 0.5 | 14  | 0.4 | 10  | 0.3 | 1   | 0.0 | < .001  |
| Post-PCI                | 125 | 4.1 | 149 | 4.3 | 128 | 3.2 | 97  | 2.5 | < .0001 |
| Cardiogenic             |     |     |     |     |     |     |     |     |         |
| Yes                     | 102 | 3.3 | 108 | 3.1 | 108 | 2.7 | 82  | 2.1 | < .01   |
| No                      | 10  | 0.3 | 22  | 0.6 | 8   | 0.2 | 9   | 0.2 | .08     |
| Uncertain               | 13  | 0.4 | 19  | 0.5 | 12  | 0.3 | 6   | 0.2 | < .05   |
| PCI related             |     |     |     |     |     |     |     |     |         |
| Yes                     | 4   | 0.1 | 5   | 0.1 | 7   | 0.2 | 8   | 0.2 | .40     |
| No                      | 88  | 2.9 | 120 | 3.4 | 100 | 2.5 | 80  | 2.0 | < .01   |
| Uncertain               | 33  | 1.1 | 24  | 0.7 | 21  | 0.6 | 9   | 0.2 | < .0001 |

ACS, acute coronary syndrome; MI, myocardial infarction; PCI, percutaneous coronary intervention; ST, stent thrombosis.

## Discussion

To the best of our knowledge, this is the first large, nationwide study of ACS patients undergoing PCI in Chinese military hospitals. Compared with contemporary developed country such as the U.S., the proportion of hospitals capable of performing PCIs more than 400 cases was substantially low (17.1%

1  
2  
3 vs 41.5% in U.S.).<sup>19</sup> Accordingly, the application rates of assisted devices were also low, such as IABP  
4  
5  
6 (1.1% to 1.7%), temporary pacemaker (1.9% to 2.4%), IVUS (1.0% to 1.4%), OCT (0.1%), and FFR  
7  
8 measurement (0.1% to 0.5%), as these support is available with experienced interventional  
9  
10 cardiologists and skilled support staff in high-volume well-equipped facilities. Out data also suggest  
11  
12 great regional disparities of PCI procedures performed on ACS patients, with patients in the north  
13  
14 region of China (North China, Northwest, and Northeast) consumed the majority of interventional  
15  
16 resources (65.5%-67.2% of all PCI cases for ACS patients, Table1). This also reflects pandemic state of  
17  
18 unstable coronary artery disease in these regions.<sup>20-22</sup> In this regard, medical resources shall be  
19  
20 prioritized to better serve disparate needs in different regions, especially the north region of China.  
21  
22 Furthermore, the health care coverage system in contemporary China is also concerning, as during  
23  
24 2013-2014 only 53.4% to 53.6% ACS patients were covered under urban resident medical service with  
25  
26 high reimbursement rate, while 20.1% to 22.1% patients were covered under new rural cooperative  
27  
28 medical service with low reimbursement rate, and 16.3% to 17.2% patients were uncovered.<sup>23-25</sup> Given  
29  
30 the great economic burdens ACS patients bear on PCI procedures and medications during  
31  
32 hospitalization and thereafter,<sup>26-28</sup> the current medical coverage patterns shall be optimized to improve  
33  
34 the quality of life for these patients as well as their families. Nevertheless, the overall decreased trends  
35  
36 in proportions of comorbidities suggest the effectiveness of cardiovascular related disease control  
37  
38 during 2011-2014 in China.  
39  
40  
41  
42  
43  
44  
45  
46

47 Primary PCI was performed with high prevalence in hospitals of developed countries. For example,  
48  
49 in a recent nationwide Belgian STEMI registry during 2009-2013, 89.6% of STEMI patients underwent  
50  
51 primary PCI.<sup>29</sup> In the U.S. NCDR 2010-2011 report, the primary PCI consisted 84.8% of all PCI  
52  
53 performed for STEMI patients.<sup>30</sup> However, the proportion of primary PCI performed on STEMI  
54  
55  
56  
57  
58  
59  
60

1  
2  
3 patients was still very low in this study, and this proportion did not change significantly over time (44.0%  
4  
5  
6 in 2011 to 45.1% in 2014). This could be explained by the low proportion of high-volume PCI-capable  
7  
8 hospitals in China, as these hospitals are well-equipped with experienced interventional cardiologists  
9  
10 and skilled support staff, which are all required for the successful implementation of primary PCI.  
11  
12 Nevertheless, median time delay of first medical contact (FMC) to balloon dilation for primary PCIs  
13  
14 done with STEMI patients during 2013-2014 were 50 minutes, which were far below the  
15  
16 guideline-recommended threshold of 90 minutes.<sup>31</sup> This important quality improvement might be  
17  
18 catalyzed by the awareness of the performance metric for participating hospitals, as study demonstrated  
19  
20 that patients treated in hospitals that had been enrolled in the D2B Alliance for > 3 months were  
21  
22 significantly more likely to have D2B times of < 90 minutes than patients treated in non-enrolled  
23  
24 hospitals.<sup>32</sup> In this regard, the scenario of D2B time in real world practice might be less satisfying, as  
25  
26 performance metrics were largely unmonitored. Furthermore, given that time delay of angina onset to  
27  
28 FMC was still huge (median 270 minutes), great efforts are still needed to promote broader initiatives  
29  
30 at a systems level to reduce total ischemic time, which was shown as the principal determinant of  
31  
32 outcome.<sup>33,34</sup> These efforts might include patient education, improvements in emergent medical service  
33  
34 and emergent department care, establishment of networks of non-PCI-capable and PCI-capable  
35  
36 hospitals, and work with policy makers to implement healthcare system reform.<sup>35-41</sup>  
37  
38  
39  
40  
41  
42  
43  
44

45 The current study depicted several notable changes as compared with the former China PEACE  
46  
47 study. In their study, Xin Zheng and colleagues reported dramatic increase of the adoption of radial  
48  
49 artery access from 3.5% to 79.0% in the practice of interventional cardiology in China during  
50  
51 2001-2011.<sup>6</sup> In this study of ACS patients, the trend is still rising, with 72.0% PCI procedures accessed  
52  
53 via radial artery in 2011 to 90.4% in 2014, compared with 10.9% cases/procedures performed by means  
54  
55  
56  
57  
58  
59  
60

1  
2  
3 of a radial approach in 2011 to 25.2% in 2014 in the United States [NCDR]. Also, the China  
4  
5 PEACE-Retrospective CathPCI Study group reported that the proportions of patients who received a  
6  
7 glycoprotein IIb/IIIa inhibitor and clopidogrel both increased from 2001 to 2011 in non-military  
8  
9 hospitals in China.<sup>6</sup> Unlike their findings, in our study, the proportions of clopidogrel and glycoprotein  
10  
11 IIb/IIIa inhibitor both decreased significantly (95.7% to 91.8% and 15.2% to 13.0%, respectively), it  
12  
13 might suggest different patterns of medications between non-military hospitals and military hospitals in  
14  
15 the field of interventional cardiology, or just be a result of rapidly evolved medical practice in all  
16  
17 hospitals in contemporary China, possibly due to the emergence of novel P2Y12 inhibitor ticagrelor  
18  
19 and novel anticoagulant bivalirudin in China. Meanwhile, operators implanted less stents per patient in  
20  
21 2014 than in 2013 (mean 1.4 vs 1.5), which was also remarkably less than those implanted during  
22  
23 2001-2011 in China PEACE study (mean 1.4 in 2001, 1.7 in 2006, and 1.8 in 2011).<sup>6</sup> This may be as a  
24  
25 result of the enforcement of quality improvement initiatives during 2011-2014 by the Quality Control  
26  
27 Center of Intervention for Cardiovascular Diseases.<sup>7</sup> Finally, although domestic-made stents consist the  
28  
29 majority of stents used during PCI procedures, their proportion dropped significantly (65.1% in 2013 to  
30  
31 61.8% in 2014), which was quite different from the scenario of dramatic increase of domestic stents  
32  
33 used in non-military hospitals in China PEACE study during 2001-2011 (1.6% in 2001 to 74.8% in  
34  
35 2011).<sup>6</sup>

36  
37  
38  
39  
40 In a recent meta-analysis of large, high-quality, contemporary randomized studies comparing radial  
41  
42 and femoral access in invasively managed patients with ACS, radial access was found to reduce  
43  
44 mortality, major adverse cardiovascular events, and major bleeding.<sup>42</sup> Similarly, with the rising  
45  
46 adoption of radial access from 2011 to 2014 in this study, the proportion of major bleeding or  
47  
48 hematoma after PCI and in-hospital mortality were both significantly decreased over time. In this  
49  
50  
51  
52  
53  
54  
55  
56  
57  
58  
59  
60

1  
2  
3 regard, transradial access shall be advocated in countries that use it less frequently.  
4  
5

6 Compared with data reported from the NCDR (National Cardiovascular Data Registry) in the U.S.  
7  
8 during 2010-2011,<sup>30</sup> uses of ticagrelor and bivalirudin were extremely low for ACS patients undergoing  
9  
10 PCI during 2011-2014 (less than 3.3% and 1.0%, respectively), although their proportions were rising.  
11  
12 This might be explained by the delayed introduction of these drugs into Chinese pharmaceutical market,  
13  
14 as well as uncovered status under the drug list of Medical Service in China. Given the great  
15  
16 superiorities of these novel antiplatelet and anticoagulation drugs,<sup>1,43</sup> coordinated advocacy efforts are  
17  
18 needed to work with policy makers to include these drugs into the list for coverage, to improve the  
19  
20 quality of care for ACS patients and the outcomes of PCI procedures. Nevertheless, our data  
21  
22 demonstrated great improvement in the quality metrics of PCI procedures during the study years. The  
23  
24 proportion of non-obstructive CAD (stenosis < 50%) was 1.1% in 2011. Although the proportion is  
25  
26 much higher than that reported in NCDR during 2010 to 2011 (0.2%), it has dropped substantially to  
27  
28 0.1% in 2014. Our study also revealed dramatic changes in the pattern of the extent of CAD, with the  
29  
30 dominance of 3-vessel disease in 2011 (40.4%) shifted to the dominance of 1-vessel disease in 2014  
31  
32 (37.9%) and no obvious change in 2-vessel disease (23.3% to 24.0%). This trend was quite different  
33  
34 with distributions found in patients undergoing PCI in the U.S. during 2010-2011 (38.1%, 32.6%, and  
35  
36 39.1% for 1-, 2-, and 3-vessel disease, respectively).<sup>30</sup> In treated lesion vessels, although there were  
37  
38 remarkable increase of 1-vessel disease and significant decreases of 2- and 3-vessel diseases in  
39  
40 proportions, interventional operators in Chinese military hospitals still treated lower proportion of  
41  
42 1-vessel disease and higher proportion of 2-vessel disease in 2014 than peers in the U.S. during  
43  
44 2010-2011 (80.2% vs 86.2% and 15.0% vs 12.8%, respectively).<sup>30</sup> Of note, the proportion of treated  
45  
46 vessels involving left main artery (3.4% to 4.2%) was significantly higher than proportions reported in  
47  
48  
49  
50  
51  
52  
53  
54  
55  
56  
57  
58  
59  
60

1  
2  
3 the U.S. during 2010-2011(1.8%)<sup>21</sup> as well as in Chinese non-military hospitals during 2001-2011  
4  
5  
6 (0.4%-2.1%) in China PEACE study.<sup>6</sup> The facts that considerable amount of grade 0-2 TIMI flow  
7  
8 before PCI almost disappeared after PCI suggest high quality of performance of PCI procedures.  
9  
10  
11 Especially, compared with data in 2013, higher proportions of grade 0 and 1 TIMI flow before PCI  
12  
13 turned to higher proportion of grade 3 TIMI flow after PCI in 2014, suggesting the quality of  
14  
15 performance was still improving. The relatively low and decreasing rate of overall complications (1.6%  
16  
17 in 2011 to 0.7% in 2014) and death (0.5% in 2011 to 0.3% in 2014) for PCI procedures might be  
18  
19 attributable to the decrease of worse cardiac function over time (patients with Killip III-IV grades  
20  
21 decreased significantly from 2011-2013, Table S3). On the other hand, the consistent low rates are also  
22  
23 suggestive of good performance of cardiac intervention on these patients.  
24  
25  
26

27  
28 Some limitations of this study should be noted. First, the partial revision of the registry form in 2013  
29  
30 has made comparisons of some critical measures impossible during 2011-2014 consecutively. However,  
31  
32 the purpose of the necessary revision was to reflect contemporary changes in the practice of cardiac  
33  
34 intervention during the study years. And we analyzed all critical measures provided they were available.  
35  
36  
37 Second, due to the gigantic number of nationwide enrolled patients and limit of sufficient funding and  
38  
39 other resources, we only compared the in-hospital outcomes for the patients. However, it's possible to  
40  
41 follow up the long-term outcomes for these patients, given that contact information of most patients  
42  
43 were collected. Third, in this study comparisons of data with other studies were not matched exactly  
44  
45 both temporally and categorically, as to the best of our knowledge, the same large scale, nationwide  
46  
47 registries of acute coronary syndromes during the same study period were not available. Nevertheless,  
48  
49 we believe this study has given an updated and comprehensive overview of contemporary practice of  
50  
51 interventional cardiology in military hospitals in China.  
52  
53  
54  
55  
56

## CONCLUSION

This study outlined the general profiles of cardiac intervention practice in contemporary military hospital in China. Our data revealed the overall interventional resources were still limited in military hospitals, with great disparities of resources and consumptions in different geographical regions across China, and major gaps still exist in optimal medical coverage for ACS patients. Other than data from non-military hospitals, our findings can serve as an indispensable addition to a comprehensive overview of the practice of cardiac intervention in China.

**Contributors** RZ participated in the data collection and drafted the manuscript. KX participated in the data collection and design of the study. YL, QM and YH participated in the design of the study and undertook statistical analyses. All authors were involved in writing the paper and had final approval of the submitted and published versions.

**Funding** The NRCIMH program was supported by the Ministry of Health of the General Logistics Department of PLA. RZ is funded by a project grant from the Liaoning Office of Science and Technology of China (Shenyang, China, No.20170540928).

**Competing interests** None declared.

**Ethics approval** This study was approved by the ethics committee of the General Hospital of Shenyang Military Region. The requirement of informed consent was waived due to the nature of the retrospective study. All participating hospitals accepted the ethics committee approval.

**Data sharing statement** No additional data are available.

## REFERENCES

1. Han Y, Guo J, Zheng Y, et al. Bivalirudin vs heparin with or without tirofiban during primary percutaneous coronary intervention in acute myocardial infarction: the BRIGHT randomized clinical trial. *JAMA*. 2015;313(13):1336-1346.
2. Li Y, Gu J, Zhou J, et al. The epidemiology of traumatic brain injury in civilian inpatients of Chinese Military Hospitals 2001-2007. *Brain Inj*. 2015;29(7-8):981-988.
3. Xu J, Qiu J, Zhou J, et al. Pediatric burns in military hospitals of China from 2001 to 2007: a retrospective study. *Burns*. 2014;40(8):1780-1788.
4. Zhu X, Zhang DZ, et al. Interventional therapy for structural heart diseases in People's Liberation Army hospitals between 2005 and 2006 [in Chinese]. *Zhonghua Xin Xue Guan Bing Za Zhi*. 2008;36(7):608-612.
5. Rankings of Top Hospitals and Top Specialties in China: Reports from the Institute of Hospital Administration of Fudan University [in Chinese] 2009-2015.  
<http://www.fudanmed.com/institute/news222.aspx#/>. Accessed March 22, 2018.
6. Zheng X, Curtis JP, Hu S, et al. Coronary catheterization and percutaneous coronary intervention in China: 10-year results from the China PEACE-Retrospective CathPCI Study. *JAMA Intern Med*. 2016;176(4):512-521.
7. Yao TM, Chen SL, Bai SY, et al. Establishment of Quality Control System for Angiocardiopathy Interventional Therapy in Military Hospitals [in Chinese]. *Hosp Adm J Chin PLA*. 2014;21(2):133-134.
8. The initiation of facilitated authentication of China Chest Pain Centers [in Chinese].  
<http://www.chinacpc.org/home/aview/22>[in Chinese]. Accessed Jun 30, 2018.



- 1  
2  
3  
4 9. Sun Y, Xu K, Jiang TM, et al. Relationship between the degree of target vessel occlusion and the  
5  
6 in-hospital mortality in patients with acute ST-elevated myocardial infarction [in Chinese]. *Med J*  
7  
8 *Chin PLA*. 2016;(6):456-460.  
9
- 10  
11 10. Bao D, Xu K, Qiu J, et al. Effect of gender on in-hospital mortality in patients with acute  
12  
13 ST-elevation myocardial infarction undergoing primary percutaneous coronary intervention [in  
14  
15 Chinese]. *Med J Chin PLA*. 2016;41(6):446-451.  
16
- 17  
18 11. Zhao R, Xu K, Sun Y, et al. Characteristics of STEMI patients undergoing primary PCI with  
19  
20 different medical insurance coverage from the database of cardiovascular intervention diagnosis  
21  
22 and treatment of PLA [in Chinese]. *Chin J Health Care Med*. 2016;18(5).  
23
- 24  
25 12. China Society of Cardiology of Chinese Medical Association, Editorial Board of Chinese Journal  
26  
27 of Cardiology. Guideline for diagnosis and treatment of patients with unstable angina and  
28  
29 non-ST-elevation myocardial infarction [in Chinese]. *Zhonghua Xin Xue Guan Bing Za Zhi* 2007;  
30  
31 35: 295-304.  
32
- 33  
34 13. China Society of Cardiology of Chinese Medical Association, Editorial Board of Chinese Journal  
35  
36 of Cardiology. Guideline for diagnosis and treatment of patients with ST-elevation myocardial  
37  
38 infarction [in Chinese]. *Zhonghua Xin Xue Guan Bing Za Zhi* 2010; 38: 675-90.  
39
- 40  
41 14. Wright RS, Anderson JL, Adams CD, et al. 2011 ACCF/AHA Focused Update of the Guidelines  
42  
43 for the Management of Patients With Unstable Angina/ Non-ST-Elevation Myocardial Infarction  
44  
45 (Updating the 2007 Guideline): a report of the American College of Cardiology  
46  
47 Foundation/American Heart Association Task Force on Practice Guidelines.  
48  
49 *Circulation*. 2011;123(18):2022-60.  
50  
51
- 52  
53 15. Antman EM, Hand M, Armstrong PW, et al. 2007 focused update of the ACC/AHA 2004  
54  
55

- 1  
2  
3  
4 Guidelines for the Management of Patients With ST-Elevation Myocardial Infarction: a report of  
5  
6 the American College of Cardiology/American Heart Association Task Force on Practice  
7  
8 Guidelines (Writing Group to Review New Evidence and Update the ACC/AHA 2004 Guidelines  
9  
10 for the Management of Patients With ST-Elevation Myocardial Infarction). *Circulation* 2008; 117:  
11  
12 296 - 329.  
13  
14  
15  
16 16. Gibson CM, Cannon CP, Daley WL, et al. TIMI frame count: a quantitative method of assessing  
17  
18 coronary artery flow. *Circulation*. 1996;93:879-888.  
19  
20  
21 17. Cutlip DE, Windecker S, Mehran R, et al; Academic Research Consortium. Clinical end points in  
22  
23 coronary stent trials: a case for standardized definitions. *Circulation*. 2007;115(17):2344-2351.  
24  
25  
26 18. Thygesen K, Alpert JS, White HD. Universal definition of myocardial infarction. *Eur Heart J*.  
27  
28 2007;28(20):2525-2538.  
29  
30  
31 19. Masoudi FA, Ponirakis A, de Lemos JA, et al. Trends in U.S. cardiovascular care: 2016 report  
32  
33 from 4 ACC National Cardiovascular Data Registries. *J Am Coll Cardiol*.  
34  
35 2016;S0735-1097(16):37338-7.  
36  
37  
38 20. Guo Y, Barnett AG, Pan X, Yu W, Tong S. The impact of temperature on mortality in Tianjin,  
39  
40 China: a case-crossover design with a distributed lag nonlinear model. *Environ Health Perspect*.  
41  
42 2011;119:1719-1725.  
43  
44  
45 21. Tian Z, Li S, Zhang J, Jaakkola JJ, Guo Y. Ambient temperature and coronary heart disease  
46  
47 mortality in Beijing, China: a time series study. *Environ Health*. 2012;11:11-56.  
48  
49  
50 22. Yang L, Li L, Lewington S, et al. Outdoor temperature, blood pressure, and cardiovascular disease  
51  
52 mortality among 23000 individuals with diagnosed cardiovascular diseases from China. *Eur Heart*  
53  
54 *J*. 2015;36(19):1178-1185.  
55  
56  
57  
58  
59  
60

- 1  
2  
3  
4 23. Jin Y, Hou Z, Zhang D. Determinants of health insurance coverage among people aged 45 and over  
5  
6 in China: who buys public, private and multiple insurance. *PLoS One*. 2016;11(8):e0161774.  
7  
8  
9 24. Marten R, McIntyre D, Travassos C, et al. An assessment of progress towards universal health  
10  
11 coverage in Brazil, Russia, India, China, and South Africa (BRICS). *The*  
12  
13 *Lancet*. 2014;384(9960):2164-2171.  
14  
15  
16 25. Shi L, Zhang D. China's new rural cooperative medical scheme and underutilization of medical  
17  
18 care among adults over 45: evidence from CHARLS pilot data. *The Journal of Rural Health*. 2013;  
19  
20 29(s1):s51-s61.  
21  
22  
23 26. Ben-Yehuda O, Kazi DS, Bonafede M, et al. Angina and associated healthcare costs following  
24  
25 percutaneous coronary intervention: a real-world analysis from a multi-payer database. *Catheter*  
26  
27 *Cardiovasc Interv*. 2016;88(7):1017-1024.  
28  
29  
30 27. Hyun KK, Essue BM, Woodward M, et al. The household economic burden for acute coronary  
31  
32 syndrome survivors in Australia. *BMC Health Serv Res*. 2016;16(1):636.  
33  
34  
35 28. Kim J, Lee E, Lee T, Sohn A. Economic burden of acute coronary syndrome in South Korea: a  
36  
37 national survey. *BMC Cardiovasc Disord*. 2013;13:55.  
38  
39  
40 29. Argacha JF, Collart P, Wauters A, et al. Air pollution and ST-elevation myocardial infarction: a  
41  
42 case-crossover study of the Belgian STEMI registry 2009-2013. *Int J Cardiol*. 2016;223:300-305.  
43  
44  
45 30. Dehmer GJ, Weaver D, Roe MT, et al. A contemporary view of diagnostic cardiac catheterization  
46  
47 and percutaneous coronary intervention in the United States: a report from the CathPCI Registry of  
48  
49 the National Cardiovascular Data Registry, 2010 through June 2011. *J Am Coll Cardiol*.  
50  
51 2012;60(20):2017-2031.  
52  
53  
54  
55 31. O'Gara PT, Kushner FG, Ascheim DD, et al. 2013 ACCF/AHA guideline for the management of  
56  
57  
58  
59  
60

- 1  
2  
3 ST-elevation myocardial infarction: a report of the American College of Cardiology  
4  
5  
6 Foundation/American Heart Association Task Force on Practice Guidelines. *Circulation*.  
7  
8 2013;127(4):e362-425.  
9
- 10 32. Bradley EH, Nallamothu BK, Stern AF, et al. The Door-to-Balloon Alliance for Quality: who joins  
11  
12 national collaborative efforts and why? *Jt Comm J Qual Patient Saf*. 2009;35:93-9.  
13  
14
- 15 33. Armstrong PW, Boden WE. Reperfusion paradox in ST-segment elevation myocardial infarction.  
16  
17 *Ann Intern Med*. 2011;155:389-391.  
18  
19
- 20 34. Bates ER, Nallamothu BK. Commentary: the role of percutaneous coronary intervention in  
21  
22 ST-segment-elevation myocardial infarction. *Circulation*. 2008;118:567-573.  
23  
24
- 25 35. Henry TD, Sharkey SW, Burke MN, et al. A regional system to provide timely access to  
26  
27 percutaneous coronary intervention for ST-elevation myocardial infarction. *Circulation*.  
28  
29 2007;116:721-728.  
30  
31
- 32 36. Jollis JG, Roettig ML, Aluko AO, et al. Implementation of a statewide system for coronary  
33  
34 reperfusion for ST-segment elevation myocardial infarction. *JAMA*. 2007;298:2371-80.  
35  
36
- 37 37. Jacobs AK. Primary percutaneous coronary intervention without cardiac surgery on-site: coming to  
38  
39 a hospital near you? *Am Heart J*. 2008;155:585-588.  
40  
41
- 42 38. Jollis JG, Mehta RH, Roettig ML, et al. Reperfusion of acute myocardial infarction in North  
43  
44 Carolina emergency departments (RACE): study design. *Am Heart J*. 2006;152:851.e1-11.  
45  
46
- 47 39. Kalla K, Christ G, Karnik R, et al. Implementation of guidelines improves the standard of care: the  
48  
49 Viennese registry on reperfusion strategies in ST-elevation myocardial infarction (Vienna STEMI  
50  
51 registry). *Circulation*. 2006;113:2398-2405.  
52  
53
- 54 40. Rokos IC, Larson DM, Henry TD, et al. Rationale for establishing regional ST-elevation  
55  
56

- 1  
2  
3 myocardial infarction receiving center (SRC) networks. *Am Heart J.* 2006;152:661-667.  
4  
5  
6 41. Ting HH, Rihal CS, Gersh BJ, et al. Regional systems of care to optimize timeliness of reperfusion  
7  
8 therapy for ST-elevation myocardial infarction: the Mayo Clinic STEMI Protocol. *Circulation.*  
9  
10 2007;116:729-36.  
11  
12  
13 42. Ando G, Capodanno D. Radial versus femoral access in invasively managed patients with acute  
14  
15 coronary syndrome. *Ann Intern Med.* 2015;163:932-940.  
16  
17  
18 43. Wallentin L, Becker RC, Budaj A, et al. Ticagrelor versus clopidogrel in patients with acute  
19  
20 coronary syndromes. *N Engl J Med.* 2009;361:1045-57.  
21  
22  
23  
24  
25  
26  
27  
28  
29  
30  
31  
32  
33  
34  
35  
36  
37  
38  
39  
40  
41  
42  
43  
44  
45  
46  
47  
48  
49  
50  
51  
52  
53  
54  
55  
56  
57  
58  
59  
60

## Figure Legends

### **Figure 1. Overall and regional distributions of PCI-capable military hospitals and PCI procedures performed.**

Military hospitals were divided by their annual PCI volume with a threshold of 400 cases per year (A), as well as further by geographical regions (C); The overall PCI procedures performed during 2011-2014 were also grouped by annual PCI volumes of hospitals (B), and by regions (D). Northern China include North China, Northwest China and Northeast China, Southern China include South China, East China, Central China, and Southwest China.

### **Figure 2. Adjusted in-hospital mortality for ACS patients undergoing PCI.**

Adjusted odds ratio of 1 shows no difference from year 2011. We included 143063 patients (30202 in 2011, 34304 in 2012, 39206 in 2013, and 39351 in 2014).

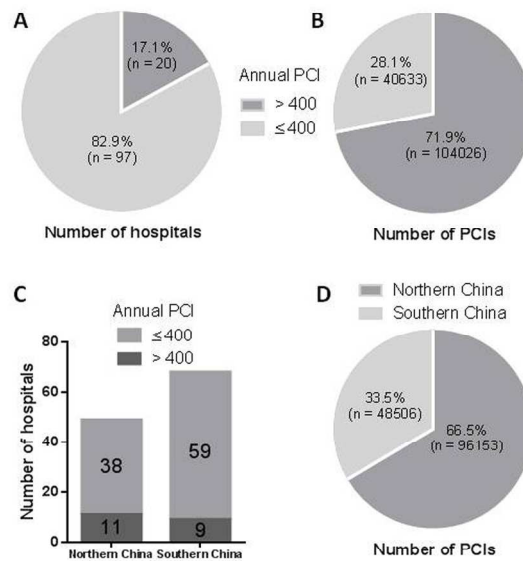

Figure 1. Overall and regional distributions of PCI-capable military hospitals and PCI procedures performed. Military hospitals were divided by their annual PCI volume with a threshold of 400 cases per year (A), as well as further by geographical regions (C); The overall PCI procedures performed during 2011-2014 were also grouped by annual PCI volumes of hospitals (B), and by regions (D). Northern China include North China, Northwest China and Northeast China, Southern China include South China, East China, Central China, and Southwest China.

190x142mm (300 x 300 DPI)

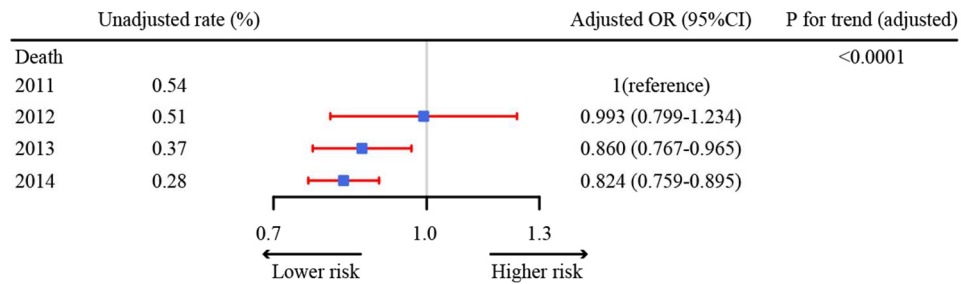

Figure 2. Adjusted in-hospital mortality for ACS patients undergoing PCI./Adjusted odds ratio of 1 shows no difference from year 2011. We included 143063 patients (30202 in 2011, 34304 in 2012, 39206 in 2013, and 39351 in 2014).

105x30mm (300 x 300 DPI)

peer review only



**Table S1. Distribution of ACS patients undergoing PCI in participated hospitals during 2011-2014**

| Hospital                                            | Region      | 2011 | 2012 | 2013 | 2014 |
|-----------------------------------------------------|-------------|------|------|------|------|
| General Hospital of Shenyang Military Region        | Northeast   | 3118 | 4198 | 5597 | 6103 |
| The 463 Hospital                                    | Northeast   | 224  | 332  | 250  | 374  |
| The 210 Hospital                                    | Northeast   | 190  | 197  | 211  | 207  |
| The 313 Hospital                                    | Northeast   | 130  | 237  | 305  | 277  |
| The 202 Hospital                                    | Northeast   | 115  | 139  | 111  | 154  |
| The 208 Hospital                                    | Northeast   | 80   | 113  | 77   | 48   |
| The 211 Hospital                                    | Northeast   | 59   | 73   | 71   | 50   |
| The 201 Hospital                                    | Northeast   | 7    | 33   | 20   | 10   |
| The 205 Hospital                                    | Northeast   | 1    | 25   | 47   | 61   |
| General Hospital of Jilin PAP Corps                 | Northeast   | 0    | 0    | 2    | 0    |
| General Hospital of PLA                             | North China | 2094 | 1993 | 1782 | 2562 |
| The Affiliated Hospital of PAP College of Logistics | North China | 1602 | 1324 | 1355 | 1391 |
| Bethune International Peace Hospital                | North China | 927  | 855  | 1009 | 950  |
| General Hospital of PAP                             | North China | 859  | 753  | 757  | 974  |
| The 252 Hospital                                    | North China | 675  | 749  | 848  | 933  |
| General Hospital of Navy                            | North China | 482  | 667  | 623  | 791  |
| The 304 Hospital                                    | North China | 398  | 502  | 263  | 254  |
| The 254 Hospital                                    | North China | 391  | 166  | 158  | 258  |
| The 309 Hospital                                    | North China | 312  | 376  | 435  | 295  |
| The General Hospital of Beijing Military Region     | North China | 240  | 372  | 408  | 488  |
| The Second Artillery General Hospital               | North China | 236  | 188  | 215  | 181  |
| General Hospital of Air Force                       | North China | 218  | 221  | 293  | 407  |
| The 305 Hospital                                    | North China | 213  | 257  | 429  | 492  |
| The 306 Hospital                                    | North China | 192  | 367  | 386  | 368  |
| The 307 Hospital                                    | North China | 125  | 137  | 126  | 102  |
| The 264 Hospital                                    | North China | 75   | 101  | 142  | 177  |
| The 261 Hospital                                    | North China | 68   | 59   | 43   | 48   |
| The 251 Hospital                                    | North China | 49   | 5    | 97   | 0    |
| The 263 Hospital                                    | North China | 0    | 0    | 21   | 48   |
| The 285 Hospital                                    | North China | 0    | 59   | 100  | 67   |
| The 464 Hospital                                    | North China | 0    | 86   | 139  | 70   |
| The Second Hospital of Beijing PAP Corps            | North China | 0    | 34   | 13   | 30   |
| General Hospital of Beijing PAP Corps               | North China | 0    | 35   | 37   | 33   |
| General Hospital of Hebei PAP Corps                 | North China | 0    | 89   | 56   | 5    |
| General Hospital of Shanxi PAP Corps                | North China | 0    | 236  | 179  | 162  |
| Changhai Hospital of SMMU                           | East China  | 750  | 1206 | 1320 | 1828 |
| General Hospital of Nanjing Military Region         | East China  | 581  | 621  | 470  | 486  |
| General Hospital of Jinan Military Region           | East China  | 472  | 393  | 267  | 335  |
| Changzheng Hospital of SMMU                         | East China  | 337  | 362  | 499  | 375  |
| The 88 Hospital                                     | East China  | 209  | 193  | 168  | 135  |
| The 148 Hospital                                    | East China  | 186  | 203  | 166  | 165  |

1  
2  
3  
4  
5  
6  
7  
8  
9  
10  
11  
12  
13  
14  
15  
16  
17  
18  
19  
20  
21  
22  
23  
24  
25  
26  
27  
28  
29  
30  
31  
32  
33  
34  
35  
36  
37  
38  
39  
40  
41  
42  
43  
44  
45  
46  
47  
48  
49  
50  
51  
52  
53  
54  
55  
56  
57  
58  
59  
60

|                                               |               |     |     |     |     |
|-----------------------------------------------|---------------|-----|-----|-----|-----|
| The 105 Hospital                              | East China    | 164 | 70  | 64  | 152 |
| The 401 Hospital                              | East China    | 162 | 144 | 92  | 33  |
| The 97 Hospital                               | East China    | 162 | 197 | 260 | 194 |
| Fuzhou General Hospital of PLA                | East China    | 158 | 196 | 344 | 272 |
| Anqing Hospital of Navy                       | East China    | 91  | 62  | 59  | 74  |
| The 101 Hospital                              | East China    | 71  | 96  | 107 | 114 |
| The 89 Hospital                               | East China    | 67  | 46  | 68  | 62  |
| The 107 Hospital                              | East China    | 65  | 113 | 181 | 40  |
| The 171 Hospital                              | East China    | 59  | 70  | 105 | 72  |
| The 404 Hospital                              | East China    | 50  | 98  | 73  | 78  |
| The 94 Hospital                               | East China    | 41  | 68  | 84  | 116 |
| The 411 Hospital                              | East China    | 37  | 38  | 53  | 64  |
| The 174 Hospital                              | East China    | 24  | 120 | 91  | 88  |
| The 180 Hospital                              | East China    | 19  | 65  | 122 | 136 |
| The 85 Hospital                               | East China    | 11  | 45  | 52  | 24  |
| The 98 Hospital                               | East China    | 10  | 9   | 10  | 42  |
| The 117 Hospital                              | East China    | 9   | 18  | 16  | 20  |
| General Hospital of Zhejiang PAP Corps        | East China    | 7   | 71  | 70  | 47  |
| The 123 Hospital                              | East China    | 0   | 42  | 70  | 54  |
| The 175 Hospital                              | East China    | 0   | 18  | 117 | 91  |
| The 456 Hospital                              | East China    | 0   | 6   | 6   | 10  |
| The 92 Hospital                               | East China    | 0   | 49  | 102 | 112 |
| General Hospital of Fujian PAP Corps          | East China    | 0   | 11  | 17  | 22  |
| General Hospital of Guangzhou Military Region | South China   | 685 | 830 | 830 | 713 |
| The 181 Hospital                              | South China   | 54  | 55  | 56  | 44  |
| The 303 Hospital                              | South China   | 49  | 7   | 48  | 62  |
| The 458 Hospital                              | South China   | 32  | 32  | 97  | 78  |
| The 163 Hospital                              | South China   | 17  | 57  | 42  | 13  |
| The 169 Hospital                              | South China   | 0   | 7   | 5   | 3   |
| General Hospital of Guangdong PAP Corps       | South China   | 0   | 112 | 211 | 195 |
| General Hospital of Hunan PAP Corps           | South China   | 0   | 49  | 44  | 22  |
| The 425 Hospital                              | South China   | 0   | 0   | 18  | 0   |
| The 187 Hospital                              | South China   | 0   | 0   | 0   | 40  |
| The 422 Hospital                              | South China   | 0   | 0   | 0   | 104 |
| The 425 Hospital                              | South China   | 0   | 0   | 0   | 16  |
| Hainan Hospital of General Hospital of PLA    | South China   | 0   | 0   | 0   | 146 |
| Wuhan General Hospital of PLA                 | Central China | 482 | 394 | 482 | 462 |
| The 150 Hospital                              | Central China | 460 | 244 | 124 | 484 |
| The 91 Hospital                               | Central China | 371 | 479 | 465 | 270 |
| The 153 Hospital                              | Central China | 183 | 180 | 76  | 93  |
| The 371 Hospital                              | Central China | 153 | 170 | 216 | 48  |
| General Hospital of Henan PAP Corps           | Central China | 145 | 91  | 142 | 52  |
| The 152 Hospital                              | Central China | 70  | 62  | 39  | 89  |
| The 155 Hospital                              | Central China | 47  | 132 | 132 | 147 |

|                                                 |               |      |      |      |      |
|-------------------------------------------------|---------------|------|------|------|------|
| The 161 Hospital                                | Central China | 47   | 77   | 66   | 76   |
| The 159 Hospital                                | Central China | 19   | 38   | 67   | 23   |
| General Hospital of Hubei PAP Corps             | Central China | 0    | 61   | 101  | 75   |
| The 477 Hospital                                | Central China | 0    | 0    | 0    | 125  |
| Xijing Hospital of FMMU                         | Northwest     | 4438 | 4514 | 5456 | 5326 |
| Tangdu Hospital of FMMU                         | Northwest     | 998  | 1287 | 1749 | 325  |
| General Hospital of Lanzhou Military Region     | Northwest     | 762  | 685  | 784  | 749  |
| Urumchi General Hospital of PLA                 | Northwest     | 469  | 489  | 623  | 617  |
| General Hospital of Shannxi PAP Corps           | Northwest     | 452  | 362  | 415  | 166  |
| The 451 Hospital                                | Northwest     | 182  | 157  | 181  | 125  |
| The 3 Hospital                                  | Northwest     | 105  | 86   | 84   | 47   |
| The 474 Hospital                                | Northwest     | 94   | 113  | 157  | 175  |
| The 323 Hospital                                | Northwest     | 74   | 105  | 109  | 97   |
| The 273 Hospital                                | Northwest     | 58   | 57   | 95   | 113  |
| The 18 Hospital                                 | Northwest     | 0    | 4    | 9    | 20   |
| General Hospital of Ningxia PAP Corps           | Northwest     | 0    | 48   | 38   | 9    |
| General Hospital of Xinjiang PAP Corps          | Northwest     | 0    | 32   | 28   | 33   |
| The 1 Hospital                                  | Northwest     | 0    | 0    | 0    | 19   |
| Kunming General Hospital of PLA                 | Southwest     | 926  | 878  | 1102 | 993  |
| Xinqiao Hospital of TMMU                        | Southwest     | 816  | 1130 | 1125 | 1393 |
| Southwest Hospital of TMMU                      | Southwest     | 790  | 903  | 863  | 364  |
| Daping Hospital of TMMU                         | Southwest     | 602  | 742  | 846  | 820  |
| The General Hospital of Chengdu Military Region | Southwest     | 237  | 543  | 748  | 733  |
| The 452 Hospital                                | Southwest     | 79   | 53   | 42   | 81   |
| The 59 Hospital                                 | Southwest     | 42   | 47   | 44   | 34   |
| Tibet General Hospital of PLA                   | Southwest     | 23   | 0    | 0    | 0    |
| The 324 Hospital                                | Southwest     | 0    | 0    | 21   | 29   |
| The 37 Hospital                                 | Southwest     | 0    | 15   | 4    | 19   |
| The 44 Hospital                                 | Southwest     | 0    | 4    | 21   | 15   |
| Chengdu Hospital of Sichuan PAP Corps           | Southwest     | 0    | 0    | 4    | 0    |
| General Hospital of Sichuan PAP Corps           | Southwest     | 0    | 27   | 57   | 68   |
| Leshan Hospital of Sichuan PAP Corps            | Southwest     | 0    | 4    | 0    | 0    |

ACS, acute coronary syndrome; PAP, people's armed police; PCI, percutaneous coronary intervention; PLA, people's liberty army; FMMU, fourth military medical university; SMMU, second military medical university; TMMU, third military medical university.

**Table S2. Medical coverage of ACS patients undergoing PCI during 2013-2014**

|                          | 2013* |      | 2014  |      | <i>P</i> |
|--------------------------|-------|------|-------|------|----------|
|                          | n     | %    | n     | %    |          |
| Medical coverage         | 18217 |      | 39361 |      |          |
| Urban resident MS        | 9728  | 53.4 | 21083 | 53.6 | .72      |
| New rural cooperative MS | 3665  | 20.1 | 8714  | 22.1 | < .0001  |
| Self-paid                | 3136  | 17.2 | 6401  | 16.3 | < .01    |
| Free MS                  | 572   | 3.1  | 915   | 2.3  | < .0001  |

|                      |     |     |      |     |         |
|----------------------|-----|-----|------|-----|---------|
| Commercial insurance | 518 | 2.8 | 911  | 2.3 | .0001   |
| Others               | 793 | 4.4 | 2043 | 5.2 | < .0001 |

ACS, acute coronary syndrome; MS, medical service; PCI, percutaneous coronary intervention;

\*Data were from part of 2013, not from the calendar year due to a systematic revision of the registry form since 2013.

**Table S3. Distribution of location of prior MI and Killip classification of ACS patients undergoing PCI during 2011-2013**

|                       | 2011 |      | 2012 |      | 2013* |      | P value for trend |
|-----------------------|------|------|------|------|-------|------|-------------------|
|                       | n    | %    | n    | %    | n     | %    |                   |
| Prior MI              |      |      |      |      |       |      |                   |
| Location              | 5306 |      | 5355 |      | 3255  |      |                   |
| Inferior              | 2449 | 46.2 | 2520 | 47.1 | 1458  | 44.8 | .33               |
| Anterior              | 2189 | 41.3 | 2261 | 42.2 | 1450  | 44.5 | < .01             |
| Anteroseptal          | 424  | 8.0  | 361  | 6.7  | 176   | 5.4  | < .0001           |
| Posterior             | 114  | 2.1  | 99   | 1.8  | 85    | 2.6  | .26               |
| Anterolateral         | 103  | 1.9  | 85   | 1.6  | 47    | 1.4  | .07               |
| Right ventricular     | 27   | 0.5  | 29   | 0.5  | 39    | 1.2  | < .001            |
| Killip classification | 5497 |      | 5897 |      | 4035  |      |                   |
| I                     | 2034 | 37.0 | 2382 | 40.4 | 1499  | 37.1 | .59               |
| II                    | 2405 | 43.8 | 2454 | 41.6 | 1986  | 49.2 | < .0001           |
| III                   | 768  | 14.0 | 792  | 13.4 | 437   | 10.8 | < .0001           |
| IV                    | 290  | 5.3  | 269  | 4.6  | 113   | 2.8  | < .0001           |

ACS, acute coronary syndrome; MI, myocardial infarction; PCI, percutaneous coronary intervention; \*Data

were from part of 2013, not from the calendar year due to a systematic revision of the registry form since 2013.

**Table S4. Time delay of STEMI patients undergoing primary PCI during 2013-2014**

|                   | 2013*        |           | 2014          | P     |
|-------------------|--------------|-----------|---------------|-------|
|                   | Median (IQR) |           | Median (IQR)  |       |
|                   | (n = 1495)   |           | (n = 3484)    |       |
| Time delay, mins  |              |           |               |       |
| Angina to Balloon | 270          | (190-415) | 270 (190-421) | .65   |
| Angina to FMC     | 225          | (130-350) | 220 (121-360) | .53   |
| FMC to Balloon    | 40           | (30-70)   | 50 (30-75)    | < .01 |

FMC, first medical contact; IQR, interquartile range; MS, medical service; PCI, percutaneous coronary intervention;

STEMI, ST elevation myocardial infarction; \*Data were from part of 2013, not from the calendar

year due to a systematic revision of the registry form since 2013.

**Table S5. Assisted device applied perioperatively in ACS patients undergoing PCI during 2011-2013**

|                     | 2011  |     | 2012  |     | 2013* |     | P value for trend |
|---------------------|-------|-----|-------|-----|-------|-----|-------------------|
|                     | n     | %   | n     | %   | n     | %   |                   |
| Assisted device     | 30800 |     | 34974 |     | 21307 |     |                   |
| Temporary pacemaker | 730   | 2.4 | 797   | 2.3 | 395   | 1.9 | < .001            |
| OCT                 | 19    | 0.1 | 43    | 0.1 | 30    | 0.1 | < .01             |

ACS, acute coronary syndrome; OCT, optical coherence tomography; PCI, percutaneous coronary intervention;

\*Data were from part of 2013, not from the calendar year due to a systematic revision of the registry form since 2013.

**Table S6. Thrombolysis of STEMI patients during 2013-2014**

|                               | 2013*        |      | 2014          |      | <i>P</i> |
|-------------------------------|--------------|------|---------------|------|----------|
|                               | n            | %    | n             | %    |          |
| Thrombolysis                  | 3564         |      | 7856          |      |          |
| Yes                           | 52           | 1.5  | 118           | 1.5  | .86      |
| No                            | 3512         | 98.5 | 7738          | 98.5 |          |
| Thrombolytic                  | 52           |      | 118           |      |          |
| Urokinase                     | 33           | 63.5 | 67            | 56.8 | .41      |
| Reteplase                     | 8            | 15.4 | 17            | 14.4 | .87      |
| Alteplase                     | 4            | 7.7  | 17            | 14.4 | .31      |
| Prourokinase                  | 3            | 5.8  | 12            | 10.2 | .56      |
| Others                        | 4            | 7.7  | 5             | 4.2  | .46      |
| Time delay, mins <sup>#</sup> |              |      |               |      |          |
| Angina to thrombolysis        | 150 (89-223) |      | 190 (130-301) |      | < .05    |
| Angina to FMC                 | 120 (60-210) |      | 160 (80-270)  |      | .08      |
| FMC to thrombolysis           | 30 (20-33)   |      | 30 (20-40)    |      | .64      |
| Thrombolysis success          | 52           |      | 118           |      |          |
| Yes                           | 44           | 84.6 | 73            | 61.9 | < .01    |
| No                            | 8            | 15.4 | 45            | 38.1 |          |

FMC, first medical contact; STEMI, ST elevation myocardial infarction; \*Data were from part of 2013, not from all of the calendar year due to a systematic revision of the registry form since 2013;

<sup>#</sup> data in the subitems were shown as median (interquartile).

**Table S7. PCI outcomes of ACS patients during 2013-2014**

|                               | 2013* |      | 2014  |      | <i>P</i> |
|-------------------------------|-------|------|-------|------|----------|
|                               | n     | %    | n     | %    |          |
| TIMI flow pre-PCI             | 21710 |      | 46928 |      |          |
| 0                             | 4254  | 19.6 | 10840 | 23.1 | < .0001  |
| 1                             | 2139  | 9.9  | 6763  | 14.4 | < .0001  |
| 2                             | 2850  | 13.1 | 4909  | 10.5 | < .0001  |
| 3                             | 12467 | 57.4 | 24416 | 52.0 | < .0001  |
| TIMI flow post-PCI            | 21705 |      | 46922 |      |          |
| 0                             | 347   | 1.6  | 645   | 1.4  | < .05    |
| 1                             | 82    | 0.4  | 183   | 0.4  | .81      |
| 2                             | 283   | 1.3  | 374   | 0.8  | < .0001  |
| 3                             | 20993 | 96.7 | 45720 | 97.4 | < .0001  |
| Guiding wire through lesion   | 21670 |      | 46890 |      |          |
| Yes                           | 21322 | 98.4 | 46184 | 98.5 | .32      |
| No                            | 348   | 1.6  | 706   | 1.5  |          |
| Stent restenosis <sup>#</sup> | 21734 |      | 46930 |      |          |
| Yes                           | 354   | 1.6  | 857   | 1.8  | .07      |
| No                            | 21380 | 98.4 | 46073 | 98.2 |          |
| Residual stenosis of lesion   | 21660 |      | 46892 |      |          |

|                                       |                  |      |                  |      |         |
|---------------------------------------|------------------|------|------------------|------|---------|
| < 10%                                 | 19912            | 91.9 | 45367            | 96.7 | < .0001 |
| 10-50%                                | 763              | 3.5  | 537              | 1.1  | < .0001 |
| > 50%                                 | 985              | 4.5  | 988              | 2.1  | < .0001 |
| FFR applied                           | 21756            |      | 46938            |      |         |
| Yes                                   | 107              | 0.5  | 189              | 0.4  | .10     |
| No                                    | 21649            | 99.5 | 46749            | 99.6 |         |
| Luminal stenosis by IVUS              | 178              |      | 439              |      |         |
| Percentage, %                         | 76 (70-85)       |      | 77 (71-83)       |      | .52     |
| Minimal luminal area, mm <sup>2</sup> | 3.04 (2.68-4.00) |      | 3.25 (2.60-4.00) |      | .59     |
| Implanted stent per patient**         | 1.5 ±0.7         |      | 1.4 ±0.7         |      | < .01   |

ACS, acute coronary syndrome; IVUS, intravascular ultrasound; FFR, fractional flow reserve; PCI, percutaneous coronary intervention; TIMI, thrombolysis in myocardial infarction; \* Data were from part of 2013, not from the calendar year due to a systematic revision of the registry form since 2013; # within lesion categories; \*\* Mean ±SD, n = 19363, 42299 in 2013-2014, respectively.

**Table S8. Stent manufacturer of ACS patients undergoing PCI during 2013-2014**

|                    | 2013* |      | 2014  |      | P       |
|--------------------|-------|------|-------|------|---------|
|                    | n     | %    | n     | %    |         |
| Stent manufacturer | 28181 |      | 60847 |      |         |
| Domestic           | 18345 | 65.1 | 37591 | 61.8 | < .0001 |
| MicroPort          | 6855  | 24.3 | 13862 | 22.8 | < .0001 |
| JW Medical         | 6678  | 23.7 | 13214 | 21.7 | < .0001 |
| Lepu Medical       | 4503  | 16.0 | 9868  | 16.2 | .37     |
| Yinyi Biotech      | 309   | 1.1  | 647   | 1.1  | .66     |
| Foreign            | 6550  | 23.2 | 14931 | 24.5 | < .0001 |
| Abbott             | 3164  | 11.2 | 6943  | 11.4 | .42     |
| Medtronic          | 2464  | 8.7  | 5514  | 9.1  | .12     |
| Boston scientific  | 922   | 3.3  | 2474  | 4.1  | < .0001 |
| Others             | 3286  | 11.7 | 8325  | 13.7 | < .0001 |

ACS, acute coronary syndrome; PCI, percutaneous coronary intervention; \* Data were from part of 2013, not from the calendar year due to a systematic revision of the registry form since 2013.

**STROBE 2007 (v4) Statement—Checklist of items that should be included in reports of *cross-sectional studies***

| Section/Topic                | Item # | Recommendation                                                                                                                                                                       | Reported on page # |
|------------------------------|--------|--------------------------------------------------------------------------------------------------------------------------------------------------------------------------------------|--------------------|
| Title and abstract           | 1      | (a) Indicate the study's design with a commonly used term in the title or the abstract                                                                                               | 2                  |
|                              |        | (b) Provide in the abstract an informative and balanced summary of what was done and what was found                                                                                  | 2                  |
| <b>Introduction</b>          |        |                                                                                                                                                                                      |                    |
| Background/rationale         | 2      | Explain the scientific background and rationale for the investigation being reported                                                                                                 | 3                  |
| Objectives                   | 3      | State specific objectives, including any prespecified hypotheses                                                                                                                     | 3                  |
| <b>Methods</b>               |        |                                                                                                                                                                                      |                    |
| Study design                 | 4      | Present key elements of study design early in the paper                                                                                                                              | 4                  |
| Setting                      | 5      | Describe the setting, locations, and relevant dates, including periods of recruitment, exposure, follow-up, and data collection                                                      | 4                  |
| Participants                 | 6      | (a) Give the eligibility criteria, and the sources and methods of selection of participants                                                                                          | 4                  |
| Variables                    | 7      | Clearly define all outcomes, exposures, predictors, potential confounders, and effect modifiers. Give diagnostic criteria, if applicable                                             | 4,5                |
| Data sources/<br>measurement | 8*     | For each variable of interest, give sources of data and details of methods of assessment (measurement). Describe comparability of assessment methods if there is more than one group | 5                  |
| Bias                         | 9      | Describe any efforts to address potential sources of bias                                                                                                                            | 5                  |
| Study size                   | 10     | Explain how the study size was arrived at                                                                                                                                            | 4                  |
| Quantitative variables       | 11     | Explain how quantitative variables were handled in the analyses. If applicable, describe which groupings were chosen and why                                                         | 5                  |
| Statistical methods          | 12     | (a) Describe all statistical methods, including those used to control for confounding                                                                                                | 5                  |
|                              |        | (b) Describe any methods used to examine subgroups and interactions                                                                                                                  | 5                  |
|                              |        | (c) Explain how missing data were addressed                                                                                                                                          | 5                  |
|                              |        | (d) If applicable, describe analytical methods taking account of sampling strategy                                                                                                   |                    |
|                              |        | (e) Describe any sensitivity analyses                                                                                                                                                |                    |
| <b>Results</b>               |        |                                                                                                                                                                                      |                    |

|                          |     |                                                                                                                                                                                                                                                                                                                                                                                                               |                                |
|--------------------------|-----|---------------------------------------------------------------------------------------------------------------------------------------------------------------------------------------------------------------------------------------------------------------------------------------------------------------------------------------------------------------------------------------------------------------|--------------------------------|
| Participants             | 13* | (a) Report numbers of individuals at each stage of study—eg numbers potentially eligible, examined for eligibility, confirmed eligible, included in the study, completing follow-up, and analysed<br>(b) Give reasons for non-participation at each stage<br>(c) Consider use of a flow diagram                                                                                                               | 6                              |
| Descriptive data         | 14* | (a) Give characteristics of study participants (eg demographic, clinical, social) and information on exposures and potential confounders<br>(b) Indicate number of participants with missing data for each variable of interest                                                                                                                                                                               | 6,7,8,9,10,11                  |
| Outcome data             | 15* | Report numbers of outcome events or summary measures                                                                                                                                                                                                                                                                                                                                                          | 11,12                          |
| Main results             | 16  | (a) Give unadjusted estimates and, if applicable, confounder-adjusted estimates and their precision (eg, 95% confidence interval). Make clear which confounders were adjusted for and why they were included<br>(b) Report category boundaries when continuous variables were categorized<br>(c) If relevant, consider translating estimates of relative risk into absolute risk for a meaningful time period | In Supplementary tables.<br>11 |
| Other analyses           | 17  | Report other analyses done—eg analyses of subgroups and interactions, and sensitivity analyses                                                                                                                                                                                                                                                                                                                |                                |
| <b>Discussion</b>        |     |                                                                                                                                                                                                                                                                                                                                                                                                               |                                |
| Key results              | 18  | Summarise key results with reference to study objectives                                                                                                                                                                                                                                                                                                                                                      | 12,13                          |
| Limitations              | 19  | Discuss limitations of the study, taking into account sources of potential bias or imprecision. Discuss both direction and magnitude of any potential bias                                                                                                                                                                                                                                                    | 17                             |
| Interpretation           | 20  | Give a cautious overall interpretation of results considering objectives, limitations, multiplicity of analyses, results from similar studies, and other relevant evidence                                                                                                                                                                                                                                    | 17                             |
| Generalisability         | 21  | Discuss the generalisability (external validity) of the study results                                                                                                                                                                                                                                                                                                                                         | 17                             |
| <b>Other information</b> |     |                                                                                                                                                                                                                                                                                                                                                                                                               |                                |
| Funding                  | 22  | Give the source of funding and the role of the funders for the present study and, if applicable, for the original study on which the present article is based                                                                                                                                                                                                                                                 | 18                             |

\*Give information separately for cases and controls in case-control studies and, if applicable, for exposed and unexposed groups in cohort and cross-sectional studies.

**Note:** An Explanation and Elaboration article discusses each checklist item and gives methodological background and published examples of transparent reporting. The STROBE checklist is best used in conjunction with this article (freely available on the Web sites of PLoS Medicine at <http://www.plosmedicine.org/>, Annals of Internal Medicine at <http://www.annals.org/>, and Epidemiology at <http://www.epidem.com/>). Information on the STROBE Initiative is available at [www.strobe-statement.org](http://www.strobe-statement.org).
