# Supplementary material for: Percutaneous coronary intervention in patients with acute coronary syndrome in Chinese Military Hospitals, 2011–2014: a retrospective observational study of a national registry
Source: PubMed Central journal article supplement — BMJ Open. 2018 Oct 24;8(10):e023133. doi: 10.1136/bmjopen-2018-023133 (PMC6224757; doi:10.1136/bmjopen-2018-023133), 2018-10-24
Supplement: bmjopen-2018-023133supp001.pdf [file bmjopen-2018-023133supp001.pdf]

**Table S1. Distribution of ACS patients undergoing PCI in participated hospitals during 2011-2014**

| Hospital                                            | Region      | 2011 | 2012 | 2013 | 2014 |
|-----------------------------------------------------|-------------|------|------|------|------|
| General Hospital of Shenyang Military Region        | Northeast   | 3118 | 4198 | 5597 | 6103 |
| The 463 Hospital                                    | Northeast   | 224  | 332  | 250  | 374  |
| The 210 Hospital                                    | Northeast   | 190  | 197  | 211  | 207  |
| The 313 Hospital                                    | Northeast   | 130  | 237  | 305  | 277  |
| The 202 Hospital                                    | Northeast   | 115  | 139  | 111  | 154  |
| The 208 Hospital                                    | Northeast   | 80   | 113  | 77   | 48   |
| The 211 Hospital                                    | Northeast   | 59   | 73   | 71   | 50   |
| The 201 Hospital                                    | Northeast   | 7    | 33   | 20   | 10   |
| The 205 Hospital                                    | Northeast   | 1    | 25   | 47   | 61   |
| General Hospital of Jilin PAP Corps                 | Northeast   | 0    | 0    | 2    | 0    |
| General Hospital of PLA                             | North China | 2094 | 1993 | 1782 | 2562 |
| The Affiliated Hospital of PAP College of Logistics | North China | 1602 | 1324 | 1355 | 1391 |
| Bethune International Peace Hospital                | North China | 927  | 855  | 1009 | 950  |
| General Hospital of PAP                             | North China | 859  | 753  | 757  | 974  |
| The 252 Hospital                                    | North China | 675  | 749  | 848  | 933  |
| General Hospital of Navy                            | North China | 482  | 667  | 623  | 791  |
| The 304 Hospital                                    | North China | 398  | 502  | 263  | 254  |
| The 254 Hospital                                    | North China | 391  | 166  | 158  | 258  |
| The 309 Hospital                                    | North China | 312  | 376  | 435  | 295  |
| The General Hospital of Beijing Military Region     | North China | 240  | 372  | 408  | 488  |
| The Second Artillery General Hospital               | North China | 236  | 188  | 215  | 181  |
| General Hospital of Air Force                       | North China | 218  | 221  | 293  | 407  |
| The 305 Hospital                                    | North China | 213  | 257  | 429  | 492  |
| The 306 Hospital                                    | North China | 192  | 367  | 386  | 368  |
| The 307 Hospital                                    | North China | 125  | 137  | 126  | 102  |
| The 264 Hospital                                    | North China | 75   | 101  | 142  | 177  |
| The 261 Hospital                                    | North China | 68   | 59   | 43   | 48   |
| The 251 Hospital                                    | North China | 49   | 5    | 97   | 0    |
| The 263 Hospital                                    | North China | 0    | 0    | 21   | 48   |
| The 285 Hospital                                    | North China | 0    | 59   | 100  | 67   |
| The 464 Hospital                                    | North China | 0    | 86   | 139  | 70   |
| The Second Hospital of Beijing PAP Corps            | North China | 0    | 34   | 13   | 30   |
| General Hospital of Beijing PAP Corps               | North China | 0    | 35   | 37   | 33   |
| General Hospital of Hebei PAP Corps                 | North China | 0    | 89   | 56   | 5    |
| General Hospital of Shanxi PAP Corps                | North China | 0    | 236  | 179  | 162  |
| Changhai Hospital of SMMU                           | East China  | 750  | 1206 | 1320 | 1828 |
| General Hospital of Nanjing Military Region         | East China  | 581  | 621  | 470  | 486  |
| General Hospital of Jinan Military Region           | East China  | 472  | 393  | 267  | 335  |
| Changzheng Hospital of SMMU                         | East China  | 337  | 362  | 499  | 375  |
| The 88 Hospital                                     | East China  | 209  | 193  | 168  | 135  |
| The 148 Hospital                                    | East China  | 186  | 203  | 166  | 165  |

|                                               |               |     |     |     |     |
|-----------------------------------------------|---------------|-----|-----|-----|-----|
| The 105 Hospital                              | East China    | 164 | 70  | 64  | 152 |
| The 401 Hospital                              | East China    | 162 | 144 | 92  | 33  |
| The 97 Hospital                               | East China    | 162 | 197 | 260 | 194 |
| Fuzhou General Hospital of PLA                | East China    | 158 | 196 | 344 | 272 |
| Anqing Hospital of Navy                       | East China    | 91  | 62  | 59  | 74  |
| The 101 Hospital                              | East China    | 71  | 96  | 107 | 114 |
| The 89 Hospital                               | East China    | 67  | 46  | 68  | 62  |
| The 107 Hospital                              | East China    | 65  | 113 | 181 | 40  |
| The 171 Hospital                              | East China    | 59  | 70  | 105 | 72  |
| The 404 Hospital                              | East China    | 50  | 98  | 73  | 78  |
| The 94 Hospital                               | East China    | 41  | 68  | 84  | 116 |
| The 411 Hospital                              | East China    | 37  | 38  | 53  | 64  |
| The 174 Hospital                              | East China    | 24  | 120 | 91  | 88  |
| The 180 Hospital                              | East China    | 19  | 65  | 122 | 136 |
| The 85 Hospital                               | East China    | 11  | 45  | 52  | 24  |
| The 98 Hospital                               | East China    | 10  | 9   | 10  | 42  |
| The 117 Hospital                              | East China    | 9   | 18  | 16  | 20  |
| General Hospital of Zhejiang PAP Corps        | East China    | 7   | 71  | 70  | 47  |
| The 123 Hospital                              | East China    | 0   | 42  | 70  | 54  |
| The 175 Hospital                              | East China    | 0   | 18  | 117 | 91  |
| The 456 Hospital                              | East China    | 0   | 6   | 6   | 10  |
| The 92 Hospital                               | East China    | 0   | 49  | 102 | 112 |
| General Hospital of Fujian PAP Corps          | East China    | 0   | 11  | 17  | 22  |
| General Hospital of Guangzhou Military Region | South China   | 685 | 830 | 830 | 713 |
| The 181 Hospital                              | South China   | 54  | 55  | 56  | 44  |
| The 303 Hospital                              | South China   | 49  | 7   | 48  | 62  |
| The 458 Hospital                              | South China   | 32  | 32  | 97  | 78  |
| The 163 Hospital                              | South China   | 17  | 57  | 42  | 13  |
| The 169 Hospital                              | South China   | 0   | 7   | 5   | 3   |
| General Hospital of Guangdong PAP Corps       | South China   | 0   | 112 | 211 | 195 |
| General Hospital of Hunan PAP Corps           | South China   | 0   | 49  | 44  | 22  |
| The 425 Hospital                              | South China   | 0   | 0   | 18  | 0   |
| The 187 Hospital                              | South China   | 0   | 0   | 0   | 40  |
| The 422 Hospital                              | South China   | 0   | 0   | 0   | 104 |
| The 425 Hospital                              | South China   | 0   | 0   | 0   | 16  |
| Hainan Hospital of General Hospital of PLA    | South China   | 0   | 0   | 0   | 146 |
| Wuhan General Hospital of PLA                 | Central China | 482 | 394 | 482 | 462 |
| The 150 Hospital                              | Central China | 460 | 244 | 124 | 484 |
| The 91 Hospital                               | Central China | 371 | 479 | 465 | 270 |
| The 153 Hospital                              | Central China | 183 | 180 | 76  | 93  |
| The 371 Hospital                              | Central China | 153 | 170 | 216 | 48  |
| General Hospital of Henan PAP Corps           | Central China | 145 | 91  | 142 | 52  |
| The 152 Hospital                              | Central China | 70  | 62  | 39  | 89  |
| The 155 Hospital                              | Central China | 47  | 132 | 132 | 147 |

|                                                 |               |      |      |      |      |
|-------------------------------------------------|---------------|------|------|------|------|
| The 161 Hospital                                | Central China | 47   | 77   | 66   | 76   |
| The 159 Hospital                                | Central China | 19   | 38   | 67   | 23   |
| General Hospital of Hubei PAP Corps             | Central China | 0    | 61   | 101  | 75   |
| The 477 Hospital                                | Central China | 0    | 0    | 0    | 125  |
| Xijing Hospital of FMMU                         | Northwest     | 4438 | 4514 | 5456 | 5326 |
| Tangdu Hospital of FMMU                         | Northwest     | 998  | 1287 | 1749 | 325  |
| General Hospital of Lanzhou Military Region     | Northwest     | 762  | 685  | 784  | 749  |
| Urumchi General Hospital of PLA                 | Northwest     | 469  | 489  | 623  | 617  |
| General Hospital of Shannxi PAP Corps           | Northwest     | 452  | 362  | 415  | 166  |
| The 451 Hospital                                | Northwest     | 182  | 157  | 181  | 125  |
| The 3 Hospital                                  | Northwest     | 105  | 86   | 84   | 47   |
| The 474 Hospital                                | Northwest     | 94   | 113  | 157  | 175  |
| The 323 Hospital                                | Northwest     | 74   | 105  | 109  | 97   |
| The 273 Hospital                                | Northwest     | 58   | 57   | 95   | 113  |
| The 18 Hospital                                 | Northwest     | 0    | 4    | 9    | 20   |
| General Hospital of Ningxia PAP Corps           | Northwest     | 0    | 48   | 38   | 9    |
| General Hospital of Xinjiang PAP Corps          | Northwest     | 0    | 32   | 28   | 33   |
| The 1 Hospital                                  | Northwest     | 0    | 0    | 0    | 19   |
| Kunming General Hospital of PLA                 | Southwest     | 926  | 878  | 1102 | 993  |
| Xinqiao Hospital of TMMU                        | Southwest     | 816  | 1130 | 1125 | 1393 |
| Southwest Hospital of TMMU                      | Southwest     | 790  | 903  | 863  | 364  |
| Daping Hospital of TMMU                         | Southwest     | 602  | 742  | 846  | 820  |
| The General Hospital of Chengdu Military Region | Southwest     | 237  | 543  | 748  | 733  |
| The 452 Hospital                                | Southwest     | 79   | 53   | 42   | 81   |
| The 59 Hospital                                 | Southwest     | 42   | 47   | 44   | 34   |
| Tibet General Hospital of PLA                   | Southwest     | 23   | 0    | 0    | 0    |
| The 324 Hospital                                | Southwest     | 0    | 0    | 21   | 29   |
| The 37 Hospital                                 | Southwest     | 0    | 15   | 4    | 19   |
| The 44 Hospital                                 | Southwest     | 0    | 4    | 21   | 15   |
| Chengdu Hospital of Sichuan PAP Corps           | Southwest     | 0    | 0    | 4    | 0    |
| General Hospital of Sichuan PAP Corps           | Southwest     | 0    | 27   | 57   | 68   |
| Leshan Hospital of Sichuan PAP Corps            | Southwest     | 0    | 4    | 0    | 0    |

ACS, acute coronary syndrome; PAP, people's armed police; PCI, percutaneous coronary intervention; PLA, people's liberty army; FMMU, fourth military medical university; SMMU, second military medical university; TMMU, third military medical university.

**Table S2. Medical coverage of ACS patients undergoing PCI during 2013-2014**

|                          | 2013* |      | 2014  |      | <i>P</i> |
|--------------------------|-------|------|-------|------|----------|
|                          | n     | %    | n     | %    |          |
| Medical coverage         | 18217 |      | 39361 |      |          |
| Urban resident MS        | 9728  | 53.4 | 21083 | 53.6 | .72      |
| New rural cooperative MS | 3665  | 20.1 | 8714  | 22.1 | < .0001  |
| Self-paid                | 3136  | 17.2 | 6401  | 16.3 | < .01    |
| Free MS                  | 572   | 3.1  | 915   | 2.3  | < .0001  |

|                      |     |     |      |     |         |
|----------------------|-----|-----|------|-----|---------|
| Commercial insurance | 518 | 2.8 | 911  | 2.3 | .0001   |
| Others               | 793 | 4.4 | 2043 | 5.2 | < .0001 |

ACS, acute coronary syndrome; MS, medical service; PCI, percutaneous coronary intervention;

\* Data were from part of 2013, not from the calendar year due to a systematic revision of the registry form since 2013.

**Table S3. Distribution of location of prior MI and Killip classification of ACS patients undergoing PCI during 2011-2013**

|                       | 2011 |      | 2012 |      | 2013* |      | P value for trend |
|-----------------------|------|------|------|------|-------|------|-------------------|
|                       | n    | %    | n    | %    | n     | %    |                   |
| Prior MI              |      |      |      |      |       |      |                   |
| Location              | 5306 |      | 5355 |      | 3255  |      |                   |
| Inferior              | 2449 | 46.2 | 2520 | 47.1 | 1458  | 44.8 | .33               |
| Anterior              | 2189 | 41.3 | 2261 | 42.2 | 1450  | 44.5 | < .01             |
| Anteroseptal          | 424  | 8.0  | 361  | 6.7  | 176   | 5.4  | < .0001           |
| Posterior             | 114  | 2.1  | 99   | 1.8  | 85    | 2.6  | .26               |
| Anterolateral         | 103  | 1.9  | 85   | 1.6  | 47    | 1.4  | .07               |
| Right ventricular     | 27   | 0.5  | 29   | 0.5  | 39    | 1.2  | < .001            |
| Killip classification | 5497 |      | 5897 |      | 4035  |      |                   |
| I                     | 2034 | 37.0 | 2382 | 40.4 | 1499  | 37.1 | .59               |
| II                    | 2405 | 43.8 | 2454 | 41.6 | 1986  | 49.2 | < .0001           |
| III                   | 768  | 14.0 | 792  | 13.4 | 437   | 10.8 | < .0001           |
| IV                    | 290  | 5.3  | 269  | 4.6  | 113   | 2.8  | < .0001           |

ACS, acute coronary syndrome; MI, myocardial infarction; PCI, percutaneous coronary intervention; \* Data

were from part of 2013, not from the calendar year due to a systematic revision of the registry form since 2013.

**Table S4. Time delay of STEMI patients undergoing primary PCI during 2013-2014**

|                   | 2013*                      | 2014                       | P     |
|-------------------|----------------------------|----------------------------|-------|
|                   | Median (IQR)<br>(n = 1495) | Median (IQR)<br>(n = 3484) |       |
| Time delay, mins  |                            |                            |       |
| Angina to Balloon | 270 (190-415)              | 270 (190-421)              | .65   |
| Angina to FMC     | 225 (130-350)              | 220 (121-360)              | .53   |
| FMC to Balloon    | 40 (30-70)                 | 50 (30-75)                 | < .01 |

FMC, first medical contact; IQR, interquartile range; MS, medical service; PCI, percutaneous coronary intervention;

STEMI, ST elevation myocardial infarction; \* Data were from part of 2013, not from the calendar year due to a systematic revision of the registry form since 2013.

**Table S5. Assisted device applied perioperatively in ACS patients undergoing PCI during 2011-2013**

|                     | 2011  |     | 2012  |     | 2013* |     | P value for trend |
|---------------------|-------|-----|-------|-----|-------|-----|-------------------|
|                     | n     | %   | n     | %   | n     | %   |                   |
| Assisted device     | 30800 |     | 34974 |     | 21307 |     |                   |
| Temporary pacemaker | 730   | 2.4 | 797   | 2.3 | 395   | 1.9 | < .001            |
| OCT                 | 19    | 0.1 | 43    | 0.1 | 30    | 0.1 | < .01             |

ACS, acute coronary syndrome; OCT, optical coherence tomography; PCI, percutaneous coronary intervention;

\* Data were from part of 2013, not from the calendar year due to a systematic revision of the registry form since 2013.

**Table S6. Thrombolysis of STEMI patients during 2013-2014**

|                               | 2013*        |      | 2014          |      | <i>P</i> |
|-------------------------------|--------------|------|---------------|------|----------|
|                               | n            | %    | n             | %    |          |
| Thrombolysis                  | 3564         |      | 7856          |      |          |
| Yes                           | 52           | 1.5  | 118           | 1.5  | .86      |
| No                            | 3512         | 98.5 | 7738          | 98.5 |          |
| Thrombolytic                  | 52           |      | 118           |      |          |
| Urokinase                     | 33           | 63.5 | 67            | 56.8 | .41      |
| Reteplase                     | 8            | 15.4 | 17            | 14.4 | .87      |
| Alteplase                     | 4            | 7.7  | 17            | 14.4 | .31      |
| Prourokinase                  | 3            | 5.8  | 12            | 10.2 | .56      |
| Others                        | 4            | 7.7  | 5             | 4.2  | .46      |
| Time delay, mins <sup>#</sup> |              |      |               |      |          |
| Angina to thrombolysis        | 150 (89-223) |      | 190 (130-301) |      | < .05    |
| Angina to FMC                 | 120 (60-210) |      | 160 (80-270)  |      | .08      |
| FMC to thrombolysis           | 30 (20-33)   |      | 30 (20-40)    |      | .64      |
| Thrombolysis success          | 52           |      | 118           |      |          |
| Yes                           | 44           | 84.6 | 73            | 61.9 | < .01    |
| No                            | 8            | 15.4 | 45            | 38.1 |          |

FMC, first medical contact; STEMI, ST elevation myocardial infarction; \* Data were from part of 2013, not from all of the calendar year due to a systematic revision of the registry form since 2013;

<sup>#</sup> data in the subitems were shown as median (interquartile).

**Table S7. PCI outcomes of ACS patients during 2013-2014**

|                               | 2013* |      | 2014  |      | <i>P</i> |
|-------------------------------|-------|------|-------|------|----------|
|                               | n     | %    | n     | %    |          |
| TIMI flow pre-PCI             | 21710 |      | 46928 |      |          |
| 0                             | 4254  | 19.6 | 10840 | 23.1 | < .0001  |
| 1                             | 2139  | 9.9  | 6763  | 14.4 | < .0001  |
| 2                             | 2850  | 13.1 | 4909  | 10.5 | < .0001  |
| 3                             | 12467 | 57.4 | 24416 | 52.0 | < .0001  |
| TIMI flow post-PCI            | 21705 |      | 46922 |      |          |
| 0                             | 347   | 1.6  | 645   | 1.4  | < .05    |
| 1                             | 82    | 0.4  | 183   | 0.4  | .81      |
| 2                             | 283   | 1.3  | 374   | 0.8  | < .0001  |
| 3                             | 20993 | 96.7 | 45720 | 97.4 | < .0001  |
| Guiding wire through lesion   | 21670 |      | 46890 |      |          |
| Yes                           | 21322 | 98.4 | 46184 | 98.5 | .32      |
| No                            | 348   | 1.6  | 706   | 1.5  |          |
| Stent restenosis <sup>#</sup> | 21734 |      | 46930 |      |          |
| Yes                           | 354   | 1.6  | 857   | 1.8  | .07      |
| No                            | 21380 | 98.4 | 46073 | 98.2 |          |
| Residual stenosis of lesion   | 21660 |      | 46892 |      |          |

|                                           |                  |      |                  |      |         |
|-------------------------------------------|------------------|------|------------------|------|---------|
| < 10%                                     | 19912            | 91.9 | 45367            | 96.7 | < .0001 |
| 10-50%                                    | 763              | 3.5  | 537              | 1.1  | < .0001 |
| > 50%                                     | 985              | 4.5  | 988              | 2.1  | < .0001 |
| FFR applied                               | 21756            |      | 46938            |      |         |
| Yes                                       | 107              | 0.5  | 189              | 0.4  | .10     |
| No                                        | 21649            | 99.5 | 46749            | 99.6 |         |
| Luminal stenosis by IVUS                  | 178              |      | 439              |      |         |
| Percentage, %                             | 76 (70-85)       |      | 77 (71-83)       |      | .52     |
| Minimal luminal area, mm <sup>2</sup>     | 3.04 (2.68-4.00) |      | 3.25 (2.60-4.00) |      | .59     |
| Implanted stent per patient <sup>**</sup> | 1.5 ± 0.7        |      | 1.4 ± 0.7        |      | < .01   |

ACS, acute coronary syndrome; IVUS, intravascular ultrasound; FFR, fractional flow reserve; PCI, percutaneous coronary intervention; TIMI, thrombolysis in myocardial infarction; \* Data were from part of 2013, not from the calendar year due to a systematic revision of the registry form since 2013; # within lesion categories; \*\* Mean ±SD, n = 19363, 42299 in 2013-2014, respectively.

**Table S8. Stent manufacturer of ACS patients undergoing PCI during 2013-2014**

|                    | 2013* |      | 2014  |      | P       |
|--------------------|-------|------|-------|------|---------|
|                    | n     | %    | n     | %    |         |
| Stent manufacturer | 28181 |      | 60847 |      |         |
| Domestic           | 18345 | 65.1 | 37591 | 61.8 | < .0001 |
| MicroPort          | 6855  | 24.3 | 13862 | 22.8 | < .0001 |
| JW Medical         | 6678  | 23.7 | 13214 | 21.7 | < .0001 |
| Lepu Medical       | 4503  | 16.0 | 9868  | 16.2 | .37     |
| Yinyi Biotech      | 309   | 1.1  | 647   | 1.1  | .66     |
| Foreign            | 6550  | 23.2 | 14931 | 24.5 | < .0001 |
| Abbott             | 3164  | 11.2 | 6943  | 11.4 | .42     |
| Medtronic          | 2464  | 8.7  | 5514  | 9.1  | .12     |
| Boston scientific  | 922   | 3.3  | 2474  | 4.1  | < .0001 |
| Others             | 3286  | 11.7 | 8325  | 13.7 | < .0001 |

ACS, acute coronary syndrome; PCI, percutaneous coronary intervention; \* Data were from part of 2013, not from the calendar year due to a systematic revision of the registry form since 2013.
